# Supplementary material for: A Setmelanotide-like Effect at MC4R Is Achieved by MC4R Dimer Separation
Source: Biomolecules. 2022 Aug 15;12(8):1119. doi: 10.3390/biom12081119 (PMC9405727; doi:10.3390/biom12081119)
Supplement: Supplementary file 1 [file biomolecules-12-01119-s001.zip]

Archive with 4 entries (4 files):
- S1_Sourcedata_Manuscript_MC4R_Chim_final.xlsx
- __MACOSX/._S1_Sourcedata_Manuscript_MC4R_Chim_final.xlsx
- Supplements_final.pdf
- __MACOSX/._Supplements_final.pdf
