# Supplementary material for: A Setmelanotide-like Effect at MC4R Is Achieved by MC4R Dimer Separation
Source: Biomolecules. 2022 Aug 15;12(8):1119. doi: 10.3390/biom12081119 (PMC9405727; doi:10.3390/biom12081119)
Supplement: Supplementary file 1 [file biomolecules-12-01119-s001.zip › S1_Sourcedata_Manuscript_MC4R_Chim_final.xlsx]

## Sheet: GloSensor
given are all raw data obtained from Glo Sensor Assays measured in Mithras 940
			0	2	4	6	8	10				12	14	16	18	20	22	24	26	28	30	32	34	36	38	40	42	44	46	48	50	52
		Time/Pos	00:00:000	0.105093	0.199421	0.304282	0.39838	0.493056			Time/Pos	00:00:000	0.10463	0.198958	0.303935	0.398264	11:48:020	0.596875	0.690741	0.796065	0.889815	0.984491	25:57:720	28:19:280	30:40:930	33:02:610	35:24:240	37:45:920	40:07:570	42:29:210	44:50:890	47:12:520
Assay 1	MC4R-WT basal	A01	650	660	680	590	660	670				610	640	660	960	1810	2580	3340	3930	4650	5340	5810	6470	7230	7680	8150	8710	9360	9590	9970	10380	10670
		A02	1240	1190	1210	1220	1120	1160				1190	1100	1100	1120	1000	980	970	920	920	820	830	780	780	770	790	680	700	720	680	690	650
		A03	1130	1170	1170	1100	1120	1140				1120	1120	1070	1060	980	980	950	920	840	840	810	760	820	770	770	720	690	760	730	740	670
	Chim5 basal	A04	2460	2360	2320	2220	2240	2190				2240	2170	2140	2130	1970	1830	1770	1810	1720	1680	1550	1600	1440	1400	1440	1410	1370	1400	1310	1330	1200
		A05	3460	3310	3170	3260	3180	3110				3290	3150	3050	2870	2760	2770	2580	2680	2470	2390	2320	2270	2280	2170	2120	2040	2040	2070	1880	1770	1750
		A06	1370	1400	1340	1350	1230	1350				1340	1330	1280	1180	1160	1150	1130	1120	970	1010	900	910	930	850	860	870	850	840	750	790	790
	Chim6 basal	A07	1510	1470	1410	1500	1420	1450				1420	1470	1430	1340	1220	1210	1120	1140	1030	1020	1050	1050	990	1030	910	910	880	880	820	780	790
		A08	1960	1920	1770	1810	1690	1770				1800	1740	1780	1650	1670	1540	1530	1330	1400	1350	1350	1270	1190	1170	1200	1060	1160	1070	1090	1030	1000
		A09	950	890	900	910	840	830				870	880	900	830	830	800	830	740	680	650	680	720	600	620	570	600	620	580	490	530	560
	Chim7 basal	A10	1530	1500	1390	1410	1430	1410				1440	1430	1400	1340	1280	1210	1270	1190	1190	1130	1140	1120	1030	1030	1010	950	970	900	880	940	820
		A11	1730	1680	1730	1720	1600	1560				1580	1730	1610	1530	1410	1390	1390	1360	1330	1260	1170	1240	1150	1100	1120	1080	1090	1070	1040	940	960
		A12	1580	1600	1460	1500	1450	1440				1450	1390	1430	1250	1170	1200	1150	1160	1070	1050	1030	970	930	940	880	850	910	810	810	790	750
	MC4R-WT isop 10-6M	B01	1040	1050	1060	970	1010	1020				20850	36450	34280	28200	24070	20670	17990	15890	13910	12550	11330	10430	9630	8790	8340	7760	7240	6780	6650	6200	5850
		B02	810	790	780	840	830	770				14800	29710	29900	25870	22120	19100	17070	15160	13670	12500	11420	10610	9660	9150	8210	7860	7440	7040	6890	6440	6190
		B03	930	900	900	860	890	880				14360	32960	34160	30740	28020	26290	25390	24900	24900	25150	26130	26680	27940	28950	30320	31530	32380	33380	34200	34870	35700
	Chim5 isop 10-6M	B04	1960	1860	1770	1760	1740	1750				46610	78220	74910	64140	54770	47800	42100	37670	33780	30750	28390	25640	23220	21650	19820	18540	17260	16000	15230	14110	13280
		B05	2680	2570	2420	2420	2390	2380				68880	108540	101030	85280	73260	63430	56670	50510	45580	41040	37690	34180	31600	29170	27310	25360	23950	22080	21130	19940	19010
		B06	1380	1330	1290	1410	1380	1330				26650	46210	45710	40600	35380	31190	27880	25330	22950	20860	19040	17700	16460	15200	14390	13360	12130	11610	10860	10340	9600
	Chim6 isop 10-6M	B07	1150	1140	1040	1030	1090	1060				15800	37920	39140	34490	30350	26210	23820	21120	18940	16860	15580	14240	12950	11850	11140	10160	9450	8640	8270	7810	7250
		B08	3220	3090	3020	3050	3090	3010				74520	134870	130440	112450	96580	83560	73410	65180	58020	52870	47800	43620	39680	36590	33480	31220	29500	27150	25500	24450	22780
		B09	970	960	980	910	900	850				10830	34020	36470	32160	28150	24690	22040	19850	18090	16190	14900	13620	12730	11570	10760	9830	9460	8680	8080	7550	7190
	Chim7 isop 10-6M	B10	1320	1210	1230	1280	1240	1260				19700	43000	42240	37150	32150	28080	24600	22410	20210	18150	16520	15480	13880	13030	12120	11200	10280	9590	9280	8580	8220
		B11	1240	1240	1190	1210	1220	1160				21780	39910	38860	33970	29560	26140	23150	20770	18590	17180	15650	14010	13060	12100	11000	10510	9660	9020	8530	7750	7470
		B12	1480	1440	1420	1310	1370	1320				21170	42800	40860	34500	28710	24680	21380	18830	16830	14780	13320	11960	11050	10240	9440	8770	8090	7800	7130	6950	6550
	MC4R-WT alpha 10-6M	C01	1210	1170	1110	1140	1120	1160				14300	62660	101570	126230	138970	147080	151910	153810	154180	153910	151300	149720	146730	144560	142080	138400	135940	133090	128990	126760	124540
		C02	770	770	760	770	810	740				12960	42690	67280	83190	93240	99160	102780	104740	106460	107330	106000	104530	103990	102880	101000	99100	97480	96130	94220	91800	89820
		C03	1130	1130	1050	1090	1110	1020				18730	59900	94280	116760	131110	139500	145850	148860	150530	150340	150330	148700	146920	145720	142310	141320	138750	136010	134230	130880	128680
	Chim5 alpha 10-6M	C04	2450	2300	2280	2250	2230	2130				25850	91780	149440	190100	218000	237020	252650	260210	267420	273920	275090	276110	276910	276280	273680	272090	269150	265860	261220	258010	254140
		C05	2710	2700	2530	2560	2480	2570				31290	111700	181490	229730	263240	286960	304250	315320	323450	329510	332110	333370	332540	331380	328930	326470	323170	320370	315470	311250	306010
		C06	1420	1420	1380	1360	1440	1370				12420	48020	82140	105180	121790	133620	142610	149110	153960	156320	158740	159810	160490	160410	159160	158330	157270	155630	154650	152120	150150
	Chim6 alpha 10-6M	C07	1300	1320	1270	1270	1300	1290				12780	49510	85620	111870	131120	146580	156570	164890	170760	174720	176030	179890	180560	180470	179830	178570	177980	175670	174340	172610	169880
		C08	2350	2320	2180	2250	2240	2240				44340	132340	205370	257010	293700	318990	336530	349480	356110	363890	366790	366680	367690	367570	362660	360330	358500	353000	347520	343120	339050
		C09	1050	1110	1130	1020	1080	1070				10710	43170	74160	96130	111850	124500	132520	139300	144070	147280	149200	151180	151260	151500	151200	150580	149200	147260	145820	143580	142540
	Chim7 alpha 10-6M	C10	1300	1240	1230	1200	1180	1260				20720	75350	120590	151780	172460	186370	194990	200630	204610	206260	207590	206380	204920	203540	201050	197610	196140	193010	189410	186420	183600
		C11	1580	1540	1500	1450	1460	1370				29070	95330	148900	185980	210550	227130	237290	245660	249200	251960	253190	251590	250570	249690	246130	243630	241440	236300	233070	229900	225510
		C12	1460	1430	1390	1300	1320	1340				23030	82260	130460	161890	181850	196740	204420	210380	213840	215180	214210	214160	212070	209740	206580	203520	200350	197450	193830	191760	188130
	MC4R-WT RM-493 10-6M	D01	1260	1250	1250	1180	1190	1300				29070	98420	139780	161720	172140	178050	179130	179510	176600	173940	171340	167550	163860	160550	156390	152060	148750	145220	141400	138130	134510
		D02	770	760	770	750	690	800				22990	65140	92080	106780	114480	118580	119300	118870	118150	118090	115510	113990	111260	109480	106840	104460	101950	99760	98150	96010	93460
		D03	930	990	1000	1000	980	960				26480	78740	113760	132230	142810	148350	150000	150680	149030	148810	145730	143440	140690	138860	135470	133310	129550	125940	124120	121260	118190
	Chim5 RM-493 10-6M	D04	2740	2630	2670	2670	2580	2550				60710	185130	267910	314340	339940	355890	364800	368210	369660	369740	368330	364280	361260	356930	351460	347260	342940	336520	331090	325250	320690
		D05	3360	3100	2920	2870	2930	3040				77720	192990	263570	302380	323880	337360	343300	346520	348330	348110	345540	341310	336540	332790	328230	322130	317590	311960	307170	301650	294720
		D06	1650	1630	1560	1530	1450	1560				32470	97670	139110	162110	175030	182500	188340	189370	191360	190390	189640	187510	185320	182770	180260	177200	175060	171320	168750	165480	163810
	Chim6 RM-493 10-6M	D07	1520	1430	1440	1440	1420	1440				34410	103680	151840	181540	197840	208320	214120	219110	220400	219860	218550	217490	215120	212800	208810	206090	203030	199660	196510	192830	188640
		D08	3040	2940	2880	2870	2860	2840				87220	241580	342660	400370	435160	457400	467300	474850	477290	478150	478050	472170	467700	462110	455230	448390	441920	434470	427570	420260	412060
		D09	1700	1750	1670	1650	1600	1680				57590	152050	215260	254190	277990	289630	299960	303140	306440	306270	305210	302220	300460	296890	293260	289090	285550	280720	276790	272320	268310
	Chim7 RM-493 10-6M	D10	1490	1390	1370	1440	1370	1320				41000	126000	185180	220010	239780	250820	256940	261220	261930	259130	259060	256980	253090	249810	245520	242290	238450	234770	230790	225260	222950
		D11	1920	1800	1780	1850	1790	1800				63840	163590	229310	266200	286860	298290	304500	307920	307590	305740	302410	298770	295420	289750	285880	280330	273450	270140	264510	259060	254570
		D12	1620	1600	1530	1420	1440	1480				50520	141580	200000	233370	252760	264600	268980	271360	273510	271140	269700	266040	263020	258280	253210	249130	244940	238570	235680	230460	225460
		Time/Pos	00:00:000	0.105093	0.199421	0.304282	0.39838	0.493056			Time/Pos	00:00:000	0.10463	0.198958	0.303935	0.398264	11:48:020	0.596875	0.690741	0.796065	0.889815	0.984491	25:57:720	28:19:280	30:40:930	33:02:610	35:24:240	37:45:920	40:07:570	42:29:210	44:50:890	47:12:520
Assay 2	MC4R-WT basal	A01	820	780	660	570	570	510				510	600	490	470	480	450	460	450	390	420	400	440	370	400	380	400	410	390	420	390	360
		A02	1120	1040	930	820	760	680				760	750	660	670	600	530	550	580	520	510	560	480	480	490	490	480	500	430	480	440	440
		A03	790	720	650	620	560	510				610	710	740	620	570	650	660	680	670	780	700	720	750	800	800	800	850	800	860	940	850
	Chim5 basal	A04	1150	1090	1010	790	800	770				810	800	740	680	710	650	690	620	600	550	600	520	540	500	570	560	600	520	490	550	500
		A05	780	750	620	560	530	500				570	610	550	500	500	460	410	400	390	400	420	380	380	460	390	340	390	360	350	370	360
		A06	1040	970	870	720	670	630				750	710	670	590	600	560	550	530	520	490	500	470	520	450	520	450	470	440	450	410	500
	Chim6 basal	A07	1140	1090	1000	890	770	710				800	800	740	750	680	680	610	580	590	570	560	590	540	560	510	570	590	510	500	530	490
		A08	600	590	550	460	430	410				480	470	450	380	390	350	370	350	330	310	300	310	310	280	290	280	290	290	270	310	280
		A09	1550	1400	1230	1140	990	940				1030	1030	960	880	820	850	760	710	710	720	690	680	710	700	630	650	630	640	630	640	590
	Chim7 basal	A10	1620	1480	1290	1160	1050	990				1080	1050	990	920	870	850	770	740	720	730	690	660	740	620	650	580	660	720	650	660	640
		A11	1170	1110	1050	890	800	800				850	890	810	720	690	640	640	610	580	570	530	560	520	540	530	540	530	530	490	490	540
		A12	1910	1780	1430	1310	1110	1040				1250	1190	1130	1010	930	980	910	860	830	850	820	810	830	730	730	700	690	740	710	660	720
	MC4R-WT isop 10-6M	B01	1310	1170	1010	960	820	860				19240	40660	38170	31340	25900	21620	18650	16310	14730	12930	11710	10750	10110	9560	8830	8330	7780	7510	7180	6830	6600
		B02	910	840	770	650	610	570				16220	27210	24440	19670	16510	13990	12120	10460	9410	8340	7700	7020	6630	5880	5690	5350	5220	4880	4620	4540	4220
		B03	620	550	510	490	490	490				9460	18720	17730	15450	13780	12600	12200	11690	12040	12580	13200	14010	14930	15800	16930	18050	19140	20070	20930	21870	22400
	Chim5 isop 10-6M	B04	1110	1080	970	910	840	810				16620	30290	26230	20430	16120	13400	11340	9780	8730	7680	7090	6520	5930	5700	5450	5120	4840	4610	4610	4410	4160
		B05	610	590	530	490	410	420				10730	18110	16570	13150	10670	8810	7310	6370	5410	4880	4340	3950	3770	3560	3380	3250	3060	2910	2790	2690	2680
		B06	1360	1350	1170	1090	980	880				22630	41140	35260	27520	21270	16890	14100	12000	10590	9280	8290	7630	7150	6690	6350	6140	5640	5590	5320	5120	5120
	Chim6 isop 10-6M	B07	820	780	740	680	630	580				12820	22800	21030	17380	14620	12490	10950	9720	8530	7810	7130	6540	6080	5620	5420	5100	4800	4610	4450	4300	4220
		B08	1050	970	890	790	750	690				17940	30600	26920	21660	17070	14330	12210	10620	9110	8310	7360	6770	6250	5810	5480	5260	4950	4640	4690	4470	4290
		B09	590	580	490	480	520	410				10430	18410	16580	13480	10830	8740	7450	6360	5500	4920	4490	4110	3650	3360	3290	3100	2970	2810	2780	2640	2430
	Chim7 isop 10-6M	B10	1630	1610	1450	1290	1240	1140				24530	40270	35620	28420	23130	19290	16860	14610	12900	11450	10520	9490	8830	8160	7790	7270	6930	6490	6460	6130	5950
		B11	930	940	810	790	690	690				11480	22900	21060	16910	14050	11730	9970	8700	7630	6770	6190	5690	5160	4900	4490	4360	3980	3840	3730	3740	3390
		B12	1240	1110	940	890	810	720				14780	28020	24620	19880	15890	13000	11260	9670	8530	7270	6810	5940	5650	5230	5010	4730	4570	4380	4300	4050	4200
	MC4R-WT alpha 10-6M	C01	1250	1100	920	830	750	720				17630	64820	102450	124410	138580	145930	149920	153050	151880	150920	149670	146940	143390	142230	138390	135090	133530	129500	127940	124760	121520
		C02	960	870	780	740	680	710				14300	51200	81580	100100	111120	118040	121830	123490	124380	123710	122800	121490	119250	117640	115290	113490	111910	109930	107840	105160	104140
		C03	670	610	570	530	450	440				11940	37490	56120	67500	74110	77630	79400	80180	80350	79850	79200	78280	76450	75780	74580	73420	71880	71080	69250	68170	66770
	Chim5 alpha 10-6M	C04	880	830	770	750	660	630				11480	35530	54410	65570	74080	79000	83050	85510	Assay 2+T79:U81	87820	88460	88190	87250	86770	86790	86280	85720	84930	84120	82960	82340
		C05	860	800	690	670	710	590				7630	31810	51190	63830	72530	78150	81900	84240	86010	87140	87320	87430	87330	86790	86000	86080	84480	84180	83220	82480	81680
		C06	610	560	540	500	460	430				9060	25320	37450	44970	50090	52870	55710	56880	57650	57800	58280	57700	57500	57390	56560	55840	55580	54670	53870	53720	53250
	Chim6 alpha 10-6M	C07	1130	1120	1010	870	880	770				14300	51260	80490	100640	114140	123280	129180	134100	136570	138120	138560	139230	137650	137020	135590	134730	133220	131700	130050	128890	127130
		C08	620	520	540	510	440	400				7190	24660	39020	48150	54060	58750	61200	63690	65080	65680	65960	66360	66430	65740	65080	64960	64560	63710	63450	62900	62430
		C09	1250	1150	1080	1010	910	830				17040	57520	90580	113050	127650	137780	145600	149890	153980	155900	156640	156800	157100	155530	154870	154510	153340	151320	150490	149200	148330
	Chim7 alpha 10-6M	C10	1380	1300	1170	1130	1020	1050				32070	85560	122870	145900	160390	168520	174290	177910	179520	180590	178970	177600	175970	173660	170790	168260	165140	162080	160750	157650	155090
		C11	1150	1160	1110	930	850	800				18280	59620	90850	110550	122550	130510	135400	138150	140400	140640	140800	139780	138660	136900	135570	133110	131280	129130	127380	125400	123620
		C12	1340	1240	1050	970	840	820				26160	79950	118750	141620	155000	164090	169660	172350	174170	173160	172940	171310	168940	166810	163760	162260	159420	156770	155210	152460	150150
	MC4R-WT RM-493 10-6M	D01	1440	1250	1120	960	930	870				40970	125780	172310	194970	205240	208640	209190	207780	204030	200110	196600	191230	186040	181540	176880	172790	168950	165350	161860	158670	155330
		D02	710	640	620	550	550	520				18970	62460	88320	101250	107430	110100	110230	109900	110060	107890	104970	103170	101030	98100	95970	94470	92470	90710	87830	86020	84650
		D03	690	720	650	620	570	510				24880	68120	92940	104530	109940	112560	113420	113050	111430	110740	107730	105530	103670	100980	99700	96450	95470	93450	91770	90440	87800
	Chim5 RM-493 10-6M	D04	860	870	780	680	670	640				20560	55450	76260	87350	92660	96560	98510	99160	99260	97950	97700	96980	96040	94460	93600	92590	91730	90280	89170	88930	87920
		D05	1020	910	870	850	780	710				22710	62030	85160	97380	104280	107330	109860	110970	110560	110810	109270	108820	107050	105760	103580	103120	101780	100310	99150	97730	97070
		D06	1510	1370	1290	1260	1040	1020				31540	79970	106490	120190	127000	131270	133660	134380	133440	133030	132230	130750	128730	127040	125830	124230	123900	121030	119550	118630	117290
	Chim6 RM-493 10-6M	D07	2240	1970	1840	1680	1520	1480				65880	149910	197410	222790	236650	246340	249840	252140	251460	249560	247760	246010	241640	238190	234920	229740	227260	223840	220300	217760	214920
		D08	680	620	640	590	580	500				18250	50370	70550	81850	87160	90160	92500	93410	93910	93610	93490	92020	91050	90340	88630	87700	86310	84860	84460	83030	82270
		D09	1030	910	900	840	700	690				27040	80230	113710	130630	140230	146100	148950	150400	151170	149610	149130	147630	146490	144350	142730	140300	139580	137120	135980	135050	132730
	Chim7 RM-493 10-6M	D10	940	880	790	780	700	690				26720	68850	94390	107650	114620	118290	120160	120610	120110	118870	118260	116820	115010	112120	110920	108670	107470	105030	104040	101230	100680
		D11	1010	990	850	830	800	690				36890	90000	120680	137050	145080	149970	151650	151890	151300	151050	149320	147550	144740	142090	140030	137780	134370	133330	129970	128820	125930
		D12	1220	1150	980	870	830	760				42390	100030	132660	149640	158160	162940	165130	164930	164680	163420	162160	159090	157460	153520	151890	149390	146830	143900	142330	140460	137520
		Time/Pos	00:00:000	0.105093	0.199421	0.304282	0.39838	0.493056			Time/Pos	00:00:000	0.10463	0.198958	0.303935	0.398264	11:48:020	0.596875	0.690741	0.796065	0.889815	0.984491	25:57:720	28:19:280	30:40:930	33:02:610	35:24:240	37:45:920	40:07:570	42:29:210	44:50:890	47:12:520
Assay 3	MC4R-WT basal	A01	370	340	280	210	180	170				180	220	220	160	210	160	160	150	130	160	140	200	160	140	180	170	130	160	130	150	140
		A02	670	580	510	430	320	330				390	330	310	330	280	300	260	250	230	250	230	240	300	240	220	230	240	220	240	280	230
		A03	520	400	380	320	270	240				300	310	270	300	260	250	230	250	260	230	250	250	250	280	260	270	270	280	270	290	290
	Chim5 basal	A04	720	690	500	460	410	350				420	400	370	380	340	350	320	310	300	300	320	280	310	300	340	300	290	270	310	280	290
		A05	990	860	730	660	740	1000				2450	3150	3600	4060	4640	5530	6330	7530	8620	9560	10580	12020	13110	14220	15230	16080	17350	17900	19120	20370	20900
		A06	1220	1090	880	770	690	590				720	750	670	600	560	490	520	500	480	580	470	470	450	460	440	450	440	460	490	450	480
	Chim6 basal	A07	640	560	480	400	300	320				380	400	330	310	300	270	260	240	290	240	240	260	250	230	220	230	260	240	220	230	270
		A08	840	790	640	530	460	420				530	530	410	420	380	360	370	360	330	340	310	300	320	350	340	330	340	320	320	290	350
		A09	610	510	450	390	310	310				360	310	310	290	290	270	260	260	220	210	270	220	240	220	220	230	220	200	210	220	190
	Chim7 basal	A10	760	680	560	510	400	380				420	430	330	380	340	310	300	300	300	280	280	280	270	270	280	270	280	330	250	300	270
		A11	960	880	690	600	560	510				530	560	510	450	420	410	400	380	380	370	380	410	400	320	350	380	350	320	360	340	340
		A12	1040	840	640	520	510	430				540	530	440	390	450	380	360	310	350	320	360	330	340	360	340	310	330	320	310	340	350
	MC4R-WT isop 10-6M	B01	940	870	660	520	510	420				19660	32110	25110	18200	13910	10980	8870	7830	6760	6170	5470	5100	4790	4460	4320	4020	3910	3810	3670	3610	3590
		B02	620	580	450	400	360	310				8190	20120	17520	13560	10600	8760	7300	6270	5490	4890	4430	4040	3730	3430	3300	3060	3010	2800	2800	2740	2560
		B03	600	520	460	500	610	740				10790	20160	17940	14360	12170	10810	9970	9590	9280	9180	9230	9360	9630	9660	9920	10190	10520	10590	10580	10950	11360
	Chim5 isop 10-6M	B04	700	600	580	490	400	340				9390	18510	16370	12870	10190	8610	7050	5930	5360	4710	4110	3820	3510	3230	3070	2860	2700	2620	2480	2370	2350
		B05	770	670	660	480	470	430				12460	22370	18440	13490	10160	8020	6520	5650	4860	4580	4060	3800	3530	3460	3290	3020	2990	2930	2900	2840	2820
		B06	1150	1030	890	800	630	660				24180	35930	27160	18640	13470	10490	8960	7400	6680	5740	5370	5230	4740	4620	4440	4250	4020	4030	3940	3880	3820
	Chim6 isop 10-6M	B07	480	460	450	350	310	300				7950	14640	12770	9900	8010	6520	5670	4900	4370	3930	3540	3240	2980	2820	2650	2480	2260	2260	2190	2110	2080
		B08	660	620	490	430	390	360				10900	17310	14750	11530	9300	7690	6310	5430	4740	4230	3810	3420	3360	3010	2900	2640	2530	2500	2410	2360	2270
		B09	650	540	460	410	320	340				10370	17140	14170	10670	8320	6610	5700	4620	4080	3540	3280	3000	2670	2580	2330	2340	2200	2100	2080	1970	1920
	Chim7 isop 10-6M	B10	590	610	450	480	370	300				7920	13130	11320	8870	7160	5920	5010	4160	3610	3270	2920	2640	2400	2250	2190	2000	1940	1880	1820	1810	1700
		B11	1290	1130	970	830	760	660				17900	27720	22130	16720	13100	10370	8600	7310	6520	5750	5390	4780	4690	4380	4260	4000	3950	3820	3790	3590	3660
		B12	580	430	400	320	310	260				5930	10540	8630	6600	5260	4240	3620	3060	2680	2440	2160	1960	1870	1800	1690	1620	1560	1520	1440	1520	1480
	MC4R-WT alpha 10-6M	C01	1130	920	750	600	570	500				21300	74940	111520	131490	142360	147610	151160	151190	150510	148560	145830	142940	140520	137100	133610	130910	128380	125630	123260	122290	120250
		C02	770	710	630	550	460	450				12540	46390	71840	86580	94470	99530	102180	102990	103310	102480	101020	100220	98400	97770	95530	94730	93310	91850	90970	88790	89030
		C03	490	440	380	320	290	250				12520	35770	51430	60980	65460	68940	70370	70680	70970	69850	69230	67870	66990	65940	64370	63220	62310	61420	60110	59460	58600
	Chim5 alpha 10-6M	C04	990	840	760	660	590	550				11500	39330	61640	76240	85140	91620	95340	99000	100370	101840	102100	101180	102320	100990	99800	99090	98740	98150	98220	97190	96850
		C05	920	770	730	630	560	490				14300	41260	61080	72580	79800	84540	87980	89870	90540	91300	91930	91260	90670	90290	89820	88990	88480	88230	87930	87880	86220
		C06	1130	900	770	710	630	580				15880	45840	66290	79240	86880	91810	95690	97640	98190	98990	98790	98280	97640	98120	96770	96150	96420	95060	94780	94930	93580
	Chim6 alpha 10-6M	C07	500	440	410	300	310	270				5960	22620	35790	43600	48880	52930	55650	57100	57890	58550	59090	58690	59100	58010	57740	57290	57040	56280	55700	55930	55120
		C08	860	770	660	540	440	490				14070	42960	64430	78040	86920	93090	97050	100460	103250	103710	103870	103460	104420	103700	103140	101900	101160	100310	99300	98870	98430
		C09	530	480	450	380	380	320				8810	29180	44670	54870	61850	66940	69090	72040	73410	73810	73500	74230	73810	73780	72810	72330	71930	70250	69930	69610	69700
	Chim7 alpha 10-6M	C10	820	770	630	560	540	470				17310	51130	74790	87870	96310	101410	104270	105080	106180	105680	105480	104380	102960	101430	100220	98310	97410	95460	95120	93270	92730
		C11	740	650	540	500	430	350				11400	36450	54780	65050	70570	75280	77930	78800	79330	78770	78660	78130	77410	76030	75540	74680	73760	72930	72030	71780	70510
		C12	1270	1080	900	790	670	660				24560	75870	109900	127270	137820	143300	146570	147680	148430	148460	147410	146270	145340	142640	141590	139200	137830	136940	135380	133770	132740
	MC4R-WT RM-493 10-6M	D01	1010	920	630	610	590	460				41410	110000	143150	156570	161000	161950	161330	158040	154570	150250	145840	142410	137600	134360	130880	127440	123320	121810	119010	116540	114370
		D02	670	610	440	420	370	340				21240	63370	86480	96750	101190	102530	101970	101840	100570	97970	96370	94200	92770	90390	89300	86580	85050	84000	82670	81300	80600
		D03	680	570	520	420	410	380				19790	60930	84160	93890	99070	100870	100890	100220	98260	97430	94750	92880	91450	88860	86530	85220	84230	81430	80690	79140	78130
	Chim5 RM-493 10-6M	D04	610	570	520	490	370	380				16410	40690	54410	60380	64150	66610	67220	67920	67260	66530	66260	65870	65170	64530	63500	62420	61550	60770	60550	59590	58830
		D05	750	670	570	460	410	420				17950	45750	61290	68900	72940	74380	75970	75960	76420	76090	75400	74770	74380	72660	72200	71580	70650	70310	69640	69230	68370
		D06	900	780	680	570	590	510				22540	54260	70540	78010	81770	83600	84040	85340	84600	84410	83500	82720	81970	80980	79990	78540	78560	78280	77210	76730	76650
	Chim6 RM-493 10-6M	D07	750	670	590	490	440	440				17170	50000	68560	78240	83170	86620	87630	88570	88600	88040	87670	86980	85740	84970	83580	82620	80950	80220	79520	78360	78390
		D08	950	900	750	670	580	490				27760	76030	104140	118700	126860	130150	132400	132980	132420	131390	130700	129120	127160	125610	123990	122220	120600	119860	118160	116960	115800
		D09	490	410	370	320	270	250				14990	39100	52350	59310	62330	64180	64580	65080	64520	63460	62480	61710	60880	59570	57910	57530	56650	56100	54790	54270	53440
	Chim7 RM-493 10-6M	D10	840	770	650	580	570	470				30000	74690	99970	112960	119150	121890	123250	122320	122840	121170	119360	117890	115340	113790	112710	110610	109120	107450	105720	104900	103880
		D11	880	820	720	600	540	510				31840	77570	103460	115280	121630	123780	125310	124550	124230	122580	120670	118550	116950	115130	113290	111670	110310	108510	106660	106000	104340
		D12	560	510	460	380	340	310				15420	40810	54180	60480	63240	65020	66140	66030	66090	65260	64150	63330	62750	61290	60210	60190	59370	59040	57910	57030	56370
		Time/Pos	00:00:000	0.105093	0.199421	0.304282	0.39838	0.493056			Time/Pos	00:00:000	0.10463	0.198958	0.303935	0.398264	11:48:020	0.596875	0.690741	0.796065	0.889815	0.984491	25:57:720	28:19:280	30:40:930	33:02:610	35:24:240	37:45:920	40:07:570	42:29:210	44:50:890	47:12:520
Assay 4	MC4R-WT basal	A01	280	230	160	140	120	120				140	150	150	150	120	130	140	110	140	120	120	110	70	120	110	110	100	100	110	110	110
		A02	710	600	480	410	320	300				390	390	320	320	290	280	280	260	260	290	270	270	260	240	240	250	220	240	290	230	250
		A03	580	520	400	300	300	260				310	320	290	260	250	240	250	220	200	200	220	220	220	210	210	240	220	230	240	220	240
	Chim5 basal	A04	780	780	670	550	430	430				460	490	440	410	380	360	370	330	370	330	360	320	350	350	350	390	370	410	430	440	450
		A05	940	790	670	640	570	630				1130	1260	1420	1510	1690	1900	2180	2460	2720	3060	3500	3690	4130	4460	4830	5160	5680	6010	6400	6770	7260
		A06	890	830	640	520	490	420				480	470	460	400	370	360	360	370	340	340	280	320	340	330	300	320	320	290	330	350	330
	Chim6 basal	A07	1290	1090	830	770	600	550				660	680	570	530	520	490	460	470	450	420	430	450	420	400	400	430	430	400	390	400	380
		A08	1950	730	530	490	380	360				420	420	400	380	300	340	310	290	320	290	290	270	240	260	260	230	290	310	290	280	250
		A09	880	860	630	540	470	390				490	510	450	400	360	370	360	340	340	340	380	290	300	340	350	320	280	330	300	280	320
	Chim7 basal	A10	820	730	570	510	420	380				470	530	440	440	370	360	330	330	340	310	350	320	330	320	310	310	330	340	310	280	300
		A11	930	750	660	550	490	440				490	510	440	400	350	410	340	330	360	320	310	370	310	300	340	310	280	290	290	320	320
		A12	940	760	600	480	380	380				480	490	460	350	400	330	360	330	300	320	280	340	320	270	290	280	270	290	360	310	240
	MC4R-WT isop 10-6M	B01	980	830	660	590	450	420				18170	31630	23130	15380	10660	7960	6520	5550	4730	4430	4160	3930	3680	3520	3470	3330	3230	3070	3170	3190	3000
		B02	750	630	560	440	360	340				12630	21100	16560	11920	9100	7000	5740	5030	4200	3820	3620	3350	2990	2900	2810	2850	2650	2680	2570	2450	2490
		B03	680	680	490	510	560	780				12820	26100	22260	17630	14200	12360	11150	10650	10290	10330	10060	10240	10290	10470	10870	10930	11160	11330	11590	12100	12230
	Chim5 isop 10-6M	B04	720	650	550	440	400	360				9560	18890	15700	11800	9020	7230	5900	4910	4130	3730	3430	3200	2990	2670	2660	2640	2400	2300	2330	2310	2180
		B05	740	550	530	460	370	340				9360	19120	15690	11650	9160	7390	6180	5220	4810	4310	3840	3520	3260	2940	2860	2710	2570	2560	2390	2420	2350
		B06	790	770	610	530	430	480				13950	21810	17280	12490	9690	7520	6100	5320	4490	4190	3770	3490	3090	3090	2980	2930	2600	2620	2550	2510	2380
	Chim6 isop 10-6M	B07	1440	1270	1080	890	780	650				21130	34180	27980	20880	16470	12940	11040	9570	8690	7460	6800	6270	5770	5460	5170	4870	4800	4590	4470	4340	4170
		B08	590	540	480	380	370	320				8240	14770	12010	9060	6810	5410	4580	3830	3400	3080	2850	2540	2330	2360	2120	2070	1920	1880	1820	1710	1680
		B09	910	830	730	570	590	480				14350	23590	18080	12950	9690	7470	6080	5020	4310	3860	3530	3400	3200	3010	2890	2830	2740	2620	2610	2550	2570
	Chim7 isop 10-6M	B10	610	530	500	450	420	330				7000	13750	11190	8270	6480	5220	4350	3850	3340	3070	2780	2610	2370	2260	2190	2110	1980	1880	1800	1790	1690
		B11	720	690	560	510	440	410				10460	15510	12340	9080	6830	5570	4580	3860	3400	2950	2730	2470	2320	2270	2170	2100	2140	1940	2020	1900	1890
		B12	1020	830	720	590	490	480				11740	16580	12040	8220	5820	4570	3650	3180	2810	2580	2470	2350	2300	2120	1980	2000	2020	2010	1860	1990	1980
	MC4R-WT alpha 10-6M	C01	970	780	610	510	490	420				19990	64740	91730	104360	110390	112060	112240	110580	108800	106200	104350	101370	99380	97620	95580	93570	92240	90620	88890	88610	87980
		C02	610	570	500	420	370	330				13320	44560	65000	75510	80560	82960	84140	84050	83110	82150	80520	79030	77800	76040	74350	72690	71510	71200	69190	68340	68320
		C03	530	440	350	330	300	280				8960	33950	51610	60340	65000	66940	67680	67600	67690	66110	65320	63780	62580	61400	59700	58830	57900	57280	56290	55340	55080
	Chim5 alpha 10-6M	C04	880	820	650	580	480	450				14230	42030	60690	71930	79100	83060	85770	87460	88610	88880	89160	88510	87750	87920	87160	86300	85660	85010	84600	84700	83900
		C05	840	750	650	550	540	440				13830	40470	57470	67050	72690	76380	78360	80230	80870	81680	80930	80660	80020	79420	79120	78540	77530	77080	76620	76800	75900
		C06	730	620	590	450	470	410				10220	33390	49460	58420	64440	68040	69650	70860	71630	71920	71240	71440	71080	70440	70490	69640	69140	69070	68610	68210	68110
	Chim6 alpha 10-6M	C07	1050	940	830	740	600	530				15640	51970	79590	96490	107690	114480	120210	123930	126020	126540	126630	126760	125850	125440	124940	123710	122910	121970	120840	119860	119220
		C08	880	720	640	560	530	490				17670	54360	79910	96230	106110	112820	117280	119870	121650	122690	122110	122300	122080	121580	121550	119520	119140	118740	117880	117190	117330
		C09	550	480	430	400	350	310				10250	33070	49370	58880	65360	69460	72380	73930	75130	75580	75900	76140	76240	75580	75120	74450	74410	73980	73170	73700	72970
	Chim7 alpha 10-6M	C10	1190	1020	940	780	700	620				25900	80010	116290	138120	150740	157280	160130	162070	164090	163170	162360	160310	159060	156920	154900	153610	152740	150690	149720	147810	146510
		C11	480	410	400	310	280	250				8080	28410	41930	48980	53080	55410	56260	57540	57840	58410	57030	57210	56880	55830	55580	55300	54820	54400	54330	53500	53340
		C12	1510	1330	1090	850	790	720				32660	94060	131640	151270	161450	167100	170320	171700	172980	172690	173140	171230	171610	169940	169460	167770	167300	168020	166580	166480	164750
	MC4R-WT RM-493 10-6M	D01	1440	1150	960	830	710	680				47110	122510	154410	165040	167460	164700	161710	157480	153720	149940	145100	141420	139250	136270	133280	130950	129760	127330	125600	124620	124250
		D02	440	340	310	300	240	240				13620	41720	56070	63400	66130	66890	66840	66330	64820	63850	62380	60860	60140	57950	57540	55920	55440	54410	53410	52560	51520
		D03	500	460	410	350	300	270				17800	53060	70940	79520	81880	82940	82940	81530	80230	78490	76810	74800	73310	71500	70240	68640	67240	66190	64570	64790	63660
	Chim5 RM-493 10-6M	D04	830	740	640	540	500	470				23650	58110	74970	83770	87960	90770	91180	90770	91990	90550	90120	88490	88670	87230	86380	85420	84840	84230	83010	83270	83210
		D05	820	700	600	550	500	460				19910	54190	72100	80270	83350	85810	86160	86170	85860	85250	84820	83870	82630	82010	81310	80150	80290	79490	78780	78350	78090
		D06	1140	910	760	660	650	570				25800	65270	84790	94020	98220	100490	102280	102150	102840	102080	101550	101070	100160	99620	98140	97810	96930	96990	96510	95820	95750
	Chim6 RM-493 10-6M	D07	1700	1530	1340	1110	1030	870				47480	126840	170270	193770	205590	212840	217120	218600	219180	219170	217320	215020	212590	211810	209340	206660	205280	203160	199490	197950	196790
		D08	630	530	480	430	380	310				19710	50630	68940	77660	82460	83620	85370	85860	85340	85820	84890	84150	82920	82500	81280	80490	80440	79330	78510	78800	77450
		D09	710	640	540	550	410	360				28210	66880	88290	98480	103750	105980	107390	106860	105970	105790	104580	104800	103200	102120	101650	100010	99100	98450	97950	98000	96310
	Chim7 RM-493 10-6M	D10	1280	1200	1010	870	780	660				55050	122340	157870	175740	184230	188790	189180	190660	189260	187610	186130	183770	180700	178660	176670	174350	172060	170380	168130	166800	165170
		D11	1060	910	850	700	600	600				35670	90360	120760	134670	140120	142850	143220	143670	141660	140650	139290	138510	136690	134650	133930	132210	131260	130100	129490	128220	127470
		D12	940	810	670	600	490	470				32490	70240	89870	98930	102740	104790	105850	106050	106510	106190	105750	106030	104780	104950	103810	102600	102400	102280	101360	101050	100620
		rlu at 28 min	MC4R-WT alpha 10-6M			Chim5 alpha 10-6M			Chim6 alpha 10-6M			Chim7 alpha 10-6M			MC4R-WT RM-493 10-6M			Chim5 RM-493 10-6M			Chim6 RM-493 10-6M			Chim7 RM-493 10-6M
		Assay 1	154180	106460	150530	267420	323450	153960	170760	356110	144070	204610	249200	213840	176600	118150	149030	369660	348330	191360	220400	477290	306440	261930	307590	273510
		Assay 2	151880	124380	80350		86010	57650	136570	65080	153980	179520	140400	174170	204030	110060	111430	99260	110560	133440	251460	93910	151170	120110	151300	164680
		Assay 3	103310	70970	100370	90540	98190	57890	103250	73410	106180	79330	148430	154570	100570	98260	67260	76420	84600	88600	132420	64520	122840	124230	66090
		Assay 4	108800	83110	67690	88610	80870	71630	126020	121650	75130	164090	57840	172980	153720	64820	80230	91990	85860	102840	219180	85340	105970	189260	141660	106510

## Sheet: GloSensor_AUC
	calculation was performed as area under the curve from raw data evaluation in Graph Pad Prism 8.4.3
		alpha-MSH AUC				Setmelanotide AUC				Isop AUC
		WT	Chim5	Chim6	Chim7	WT	Chim5	Chim6	Chim7	WT	Chim5	Chim6	Chim7
	Assay 1	4785470	8916007	8065090	7880753	5236113	10914370	12016290	10003883	803127	1461897	1327867	786920
	Assay2	4151063	2768413	4251083	5853363	5022313	4174883	5994590	5260433	589360	430167	379487	473207
	Assay 3	3797903	3507957	2809340	3999037	4213420	2804597	3452507	3781803	380950	324823	230900	236040
	Assay 4	3064730	2930200	3899200	4799013	3635877	3465240	5048643	5423013	376050	256187	310727	192750

## Sheet: nanoBRET
Dimerisierung MC4R nanoBRET
Assay 1/2/3
Assay 1
NanoLuc
		w/o HT Ligand			w/ Ligand
	WT+WT	27439910	33996980	33821250	23791400	27550080	28423350
	Chim1+Chim1	31429360	31802280	35958870	27997050	28299890	28650070
	Chim7+Chim7	36396540	36211660	37669290	31538690	35970270	36641680
	H158R+H158R	27399650	29682500	29359940	24328970	25366260	27111280
	MC4R+CB1R	26274270	31986550	30973500	27240990	28859270	30279040
	CB1R+MC4R	32914060	33841960	35227710	32327070	33143040	33917020
HaloTag
		w/o HT Ligand			w/ Ligand
	WT+WT	210380	301550	288710	3291930	4091610	4459710
	Chim1+Chim1	268870	276270	348150	3650560	3690190	3904000
	Chim7+Chim7	349930	349580	385490	3026200	3819280	4115550
	H158R+H158R	216660	247060	241230	2545030	2690730	3034610
	MC4R+CB1R	209910	288290	274380	1472170	1589000	1733480
	CB1R+MC4R	295360	313710	335340	1871320	1943100	2064290
Assay 2
NanoLuc
		w/o HT Ligand			w/ Ligand
	WT+WT	17102570	19315350	16137100	11347390	13461100	14299040
	Chim1+Chim1	18484710	21105400	22402490	16326640	17141070	19618150
	Chim7+Chim7	21580330	25547300	25420210	19185190	24726410	21337550
	H158R+H158R	16077020	19756980	19066820	15475380	16985300	18875130
	MC4R+CB1R	20702510	20761260	21792560	20013610	21249020	18789850
	CB1R+MC4R	24945740	27736820	28737810	24919210	29227580	28976290
HaloTag
		w/o HT Ligand			w/ Ligand
	WT+WT	108420	127330	99980	1148880	1400070	1587280
	Chim1+Chim1	123360	147360	159590	1641810	1743470	2126680
	Chim7+Chim7	148130	189180	186080	1260520	1792010	1488530
	H158R+H158R	101900	132990	126060	1345700	1515800	1772800
	MC4R+CB1R	141580	143380	149430	886060	959130	832350
	CB1R+MC4R	181230	212860	222430	1115850	1448960	1468700
Assay 3
NanoLuc
		w/o HT Ligand			w/ Ligand
	WT+WT	24381620	28814880	25284600	19697210	22273290	24433610
	Chim1+Chim1	26494110	32021390	30312170	24117810	28701820	25385910
	Chim7+Chim7	29709550	33270190	31404140	27547820	30176450	30970840
	H158R+H158R	18007340	20934120	18584450	15747020	16443810	18156550
	MC4R+CB1R	28010010	31916600	27367310	26918030	27738210	29919750
	CB1R+MC4R	32300150	35639360	33120730	30190560	31813640	34827890
HaloTag
		w/o HT Ligand			w/ Ligand
	WT+WT	180440	234580	192310	2426010	2833740	3369860
	Chim1+Chim1	207200	283570	256760	2738760	3535130	3098840
	Chim7+Chim7	243590	299950	270170	2204190	2496820	2666770
	H158R+H158R	122950	150230	128130	1540500	1572760	1846050
	MC4R+CB1R	223360	278530	213340	1330720	1370020	1587310
	CB1R+MC4R	277070	334980	289900	1488730	1595010	1919390
Assay 4/5/6	CAVE:fehlerhafte Chim 4, daher Chim 4 nicht mit in Daten werten
Assay 4
NanoLuc
		w/o HT Ligand			w/ Ligand			w/o HT Ligand			w/ Ligand
	WT+WT	20351920	23741020	26458510	16825720	18286290	19297230	31899900	38574260	26733300	36732770	27512480	23887220	CB1R+MC4R
	Chim2+Chim2	27542210	30423920	30653300	20471080	23474010	26508020
	Chim3+Chim3	28241720	28097650	29988390	17485370	23293470	25164260
	Chim4+Chim4	7549310	8417160	8426040	5778910	7764820	6967240
	Chim5+Chim5	38577450	40374200	39235490	31025720	35130040	37697200
	Chim6+Chim6	33575010	36149650	33827070	27295070	29909300	31151520
	CB1R+CB1R	29737350	31493180	30286810	23561190	27535440	30145450
	MC4R+CB1R	23707790	26013770	25208550	19321540	23189830	25652620
HaloTag
		w/o HT Ligand			w/ Ligand			w/o HT Ligand			w/ Ligand
	WT+WT	133680	168430	201220	2020940	2179650	2352050	270750	395290	202570	2290110	1391560	1140370	CB1R+MC4R
	Chim2+Chim2	211530	250770	251130	2566220	2933380	3446580
	Chim3+Chim3	221700	221240	244290	2312400	3212260	3574190
	Chim4+Chim4	44150	50840	50200	42890	61970	54140
	Chim5+Chim5	400780	444290	413430	2656850	3225740	3733650
	Chim6+Chim6	300180	342880	302860	3226630	3573400	3814280
	CB1R+CB1R	238540	260890	242870	741390	942560	1120110
	MC4R+CB1R	170070	193730	183340	733350	964780	1196070
Assay 5
NanoLuc
		w/o HT Ligand			w/ Ligand			w/o HT Ligand			w/ Ligand
	WT+WT	26830840	27836870	30048420	20425880	21589170	24125330	36441440	31744540	27100850	32044020	29820750	22384870	CB1R+MC4R
	Chim2+Chim2	30563960	33203250	32445990	26533560	26951270	29371720
	Chim3+Chim3	30324270	32639630	29528960	23267210	25936780	28337110
	Chim4+Chim4	4573670	3821480	3671930	2937510	3913810	4183490
	Chim5+Chim5	32255110	34242080	33227950	27830980	30542340	33310720
	Chim6+Chim6	24580270	24782010	24767750	20300020	21845810	23292610
	CB1R+CB1R	27323630	28538710	29028130	23252730	25234180	26459110
	MC4R+CB1R	27892550	28035880	28057670	25559960	25631770	25745310
HaloTag
		w/o HT Ligand			w/ Ligand			w/o HT Ligand			w/ Ligand
	WT+WT	206320	221050	249710	2572160	2721450	3144810	358040	275730	212170	1793340	1596960	1040020	CB1R+MC4R
	Chim2+Chim2	258000	298660	287030	3568400	3540060	4050100
	Chim3+Chim3	258140	296590	247570	3309270	3758080	4271430
	Chim4+Chim4	26590	22370	21570	23660	31750	34800
	Chim5+Chim5	283980	317700	296830	1963700	2215770	2559050
	Chim6+Chim6	184090	188240	186010	1870900	1993610	2172490
	CB1R+CB1R	211890	227890	232790	695770	793160	858190
	MC4R+CB1R	220660	223270	221700	1065820	1071640	1105470
Assay 6 (ohne Chim4)
NanoLuc
		w/o HT Ligand			w/ Ligand
	WT+WT	19081520	23838310	26066520	14112380	15962480	15796570
	Chim2+Chim2	28887640	27413620	32294270	17553440	22536070	24257200
	Chim3+Chim3	27040770	27042840	27637060	17946910	21422450	22614350
	Chim5+Chim5	29902640	30987890	35613120	26467600	28707740	25892090
	Chim6+Chim6	27302550	29480820	31081070	21590270	25894860	26290100
	CB1R+CB1R	31463350	29119260	32926000	27924970	28459440	28563530
	MC4R+CB1R	26375190	27109740	31867100	21914850	24722130	25977100
	CB1R+MC4R	31877270	30826410	31152700	26751440	29046300	29534520
HaloTag
		w/o HT Ligand			w/ Ligand
	WT+WT	125460	168100	192920	1577240	1853610	1873970
	Chim2+Chim2	226910	210180	276720	2058880	2764220	3045910
	Chim3+Chim3	203430	206270	212780	2229100	2764170	2984380
	Chim5+Chim5	240120	251390	329540	1893360	2147140	1834470
	Chim6+Chim6	207890	235880	257460	2184560	2772770	2844640
	CB1R+CB1R	258480	228850	278190	1036910	1061580	1068760
	MC4R+CB1R	196280	208310	269210	970320	1131950	1238110
	CB1R+MC4R	259980	247180	254350	1296380	1485860	1527110
Assay 7A+B
Assay 8A+B
						B
	A
Assay 7A
NanoLuc
		w/o HT Ligand			w/ Ligand
	WT+WT	18396530	21307840	22944520	15893930	18153470	18702060
	Chim4+Chim4	20439180	23662530	25297190	18828210	21761330	21945000
	CB1R+CB1R	14017040	15885820	18328050	12836380	14499550	15971980
	MC4R+CB1R	9539460	11369060	11672090	9591230	10856440	10475240
	CB1R+MC4R	13020800	15591410	15529510	13420390	14838020	13067780
HaloTag
		w/o HT Ligand			w/ Ligand
	WT+WT	120430	150790	167130	1428340	1715450	1807190
	Chim4+Chim4	140190	171010	188610	1099230	1328870	1329800
	CB1R+CB1R	87360	101960	121770	347800	408250	462370
	MC4R+CB1R	56350	69890	72090	242370	281160	266370
	CB1R+MC4R	78770	98510	96890	525690	596980	498470
Assay 7B
NanoLuc
		w/o HT Ligand			w/ Ligand
	WT+WT	13732950	15118900	16584250	11450770	12921350	13467370
	Chim4+Chim4	17304660	19249860	22582620	17419560	19084260	21033030
	CB1R+CB1R	8111130	8807650	10199020	8616780	9710390	10363080
	MC4R+CB1R	9499680	14571640	12522550	10117490	10835530	10399550
	CB1R+MC4R	13112880	15262550	13801260	12332060	15065440	13507890
HaloTag
		w/o HT Ligand			w/ Ligand
	WT+WT	84630	95890	106840	1002260	1135690	1191520
	Chim4+Chim4	110990	129240	161260	941200	1047890	1201420
	CB1R+CB1R	46050	51050	59730	202060	238660	263670
	MC4R+CB1R	58220	93700	76990	276030	321880	307620
	CB1R+MC4R	81080	97580	86070	493260	624410	538700
8A
NanoLuc
		w/o HT Ligand			w/ Ligand
	WT+WT	17464840	20568260	20263400	13435910	13358730	15008690
	Chim4+Chim4	27382310	29936490	30717650	22873310	23957740	26713850
	CB1R+CB1R	18266010	21353420	23468700	19490900	20660020	21552590
	MC4R+CB1R	16064910	19492810	19495600	17912460	18944410	19424170
	CB1R+MC4R	18766960	21472640	22607060	20587140	20010030	20271300
HaloTag
		w/o HT Ligand			w/ Ligand
	WT+WT	112950	142880	140440	1321040	1294240	1472010
	Chim4+Chim4	214000	245740	255380	1723960	1775080	2105000
	CB1R+CB1R	120460	149030	171010	626890	673260	702200
	MC4R+CB1R	106840	135180	135390	555480	590770	624330
	CB1R+MC4R	125620	151220	160730	970820	917960	941880
8B
NanoLuc
		w/o HT Ligand			w/ Ligand
	WT+WT	16130190	22413990	24658800	14778860	17742390	18734200
	Chim4+Chim4	23602650	26907070	29812880	21663360	24089340	25352180
	CB1R+CB1R	19344360	22727500	23291390	17944840	20130910	20333350
	MC4R+CB1R	21751720	23309420	24585130	19852380	21384450	20753190
	CB1R+MC4R	21906280	26921080	27516250	18955820	21276670	24119530
HaloTag
		w/o HT Ligand			w/ Ligand
	WT+WT	104230	160220	183560	1537180	1871410	1975430
	Chim4+Chim4	171030	208130	243890	1317040	1507870	1641890
	CB1R+CB1R	127620	159990	166510	514090	597730	630600
	MC4R+CB1R	156340	171110	184460	714300	807120	810650
	CB1R+MC4R	154790	208330	214170	909070	1059970	1229330

## Sheet: BRET_Ratio
BRET Ratio
		Assay 1					Assay 2					Assay 3
		background		corrected BRET Ratio [mBU]			background		corrected BRET Ratio [mBU]			background		corrected BRET Ratio [mBU]
	WT+WT	0.00835773		130.009	140.158	148.545	0.00637574		94.8704	97.6328	104.63	0.0077158		115.449	119.51	130.203
	Chim1+Chim1	0.00897458		122.033	122.038	127.907	0.00692649		94.1844	95.3373	102.028	0.00838226		105.842	115.452	114.353
	Chim2+Chim2
	Chim3+Chim3
	Chim4+Chim4
	Chim5+Chim5
	Chim6+Chim6
	Chim7+Chim7	0.0098339		87.5943	97.8211	103.961	0.00719646		59.327	66.0978	63.3853	0.00860588		72.2974	75.0249	78.39
	H158R+H158R	0.00814904		96.2513	97.7174	103.574	0.00656034		80.5817	82.8661	87.5468	0.00696619		90.1122	87.9287	93.9582
	CB1R+CB1R
	MC4R+CB1R	0.00862019		45.6847	46.7026	48.8924	0.00686728		37.8971	38.7619	37.9221	0.00816551		41.7202	41.6753	45.3364
	CB1R+MC4R	0.00925425		49.5294	50.27	52.5052	0.00755974		38.403	43.1994	44.3105	0.00890999		41.5953	42.4202	47.3949
		Assay 4					Assay 5					Assay 6
		background		corrected BRET Ratio [mBU]			background		corrected BRET Ratio [mBU]			background		corrected BRET Ratio [mBU]
	WT+WT	0.00708934		113.021	112.107	114.796	0.00798027		117.946	118.076	122.373	0.00700923		104.754	109.114	111.622
	Chim1+Chim1
	Chim2+Chim2	0.00803844		118.269	117.874	122.931	0.00876087		126.506	123.37	129.911	0.0080302		110.283	115.648	118.558
	Chim3+Chim3	0.00795674		125.158	130.815	134.945	0.00866114		134.249	136.914	142.756	0.00761656		117.196	122.022	124.959
	Chim4+Chim4	0.00594866		0.332479	0.891531	0.681316	0.00584725		0.0741674	0.132027	0.33814
	Chim5+Chim5	0.0106435		78.5445	84.7335	91.9538	0.00900513		62.5778	64.5672	68.8433	0.00796631		64.5258	67.7838	63.8414
	Chim6+Chim6	0.00912626		111.124	112.385	115.353	0.00753178		84.1822	83.278	85.2892			94.1734	100.069	101.193
	Chim7+Chim7
	H158R+H158R
	CB1R+CB1R	0.00810819		24.3772	27.1415	30.0675	0.00791986		21.9418	23.4517	24.4543	0.00817443		30.1228	30.2923	30.4077
	MC4R+CB1R	0.00729791		30.8657	34.5142	39.5363	0.00792546		33.7185	33.8288	34.9584	0.0078579		37.2676	38.7777	40.6524
	CB1R+MC4R	0.00877081		53.5743	41.8084	38.9689	0.00877996		47.1849	44.772	37.6809	0.00811291		41.451	44.1457	44.6967
		Assay 7A					Assay 7B					Assay 8A					Assay 8B
		background		corrected BRET Ratio [mBU]			background		corrected BRET Ratio [mBU]			background		corrected BRET Ratio [mBU]			background		corrected BRET Ratio [mBU]
	WT+WT	0.00696906		82.898	87.528	89.6615	0.00631573		81.212	81.5768	82.1589	0.00678154		91.54	90.1019	91.2956	0.007018		96.9941	98.4588	98.4271
	Chim1+Chim1
	Chim2+Chim2
	Chim3+Chim3
	Chim4+Chim4	0.00718056		51.413	54.0966	53.6279	0.00675619		47.7155	48.5929	50.8049	0.00811259		68.5884	67.3106	72.0165	0.00772068		53.7777	55.5769	57.7453
	Chim5+Chim5
	Chim6+Chim6
	Chim7+Chim7
	H158R+H158R
	CB1R+CB1R	0.00643154		20.1258	21.187	21.9798	0.00577664		17.1339	18.2621	19.1275	0.00695357		25.3817	25.806	25.7992	0.00692859		21.6303	22.6741	23.9951
	MC4R+CB1R	0.0060769		18.3009	18.9289	18.4595	0.00623568		20.9667	23.3902	23.2644	0.00684334		24.2293	24.4029	25.3604	0.00734373		28.9626	30.7253	32.0435
	CB1R+MC4R	0.00620229		32.2019	33.2641	31.1759	0.00627102		33.6825	35.1308	33.5647	0.00694862		40.3751	39.0935	39.6822	0.00752932		40.9393	42.8004	43.9502
	nanoBRET rations
	MC4R-WT+MC4R-WT	Chim1+Chim1	Chim2+Chim2	Chim3+Chim3	Chim4+Chim4	Chim5+Chim5	Chim6+Chim6	Chim7+Chim7	H158R+H158R
	-9.56	-17.54	4.96	11.85	-35.28	-34.76	-2.18	-51.98	-43.32
	0.59	-17.53	4.57	17.51	-32.6	-28.57	-0.92	-41.75	-41.85
	8.97	-11.66	9.62	21.64	-33.07	-21.35	2.05	-35.61	-36
	-4.17	-4.86	7.04	14.78	-33.93	-56.89	-35.28	-39.72	-18.46
	-1.41	-3.71	3.91	17.45	-33.06	-54.9	-36.19	-32.95	-16.18
	5.59	2.98	10.45	23.29	-30.84	-50.62	-34.18	-35.66	-11.5
	-6.27	-15.88	1.79	8.7	-22.39	-43.97	-14.32	-49.42	-31.61
	-2.21	-6.27	7.15	13.53	-23.67	-40.71	-8.43	-46.7	-33.79
	8.48	-7.37	10.06	16.46	-18.96	-44.66	-7.3	-43.33	-27.76
	-0.29				-44.18
	-1.2				-42.38
	1.49				-40.21
	-1.52
	-1.39
	2.91
	-3.74
	0.62
	3.13
	-3.8
	0.83
	2.97
	-0.44
	-0.07
	0.51
	0.56
	-0.88
	0.32
	-0.97
	0.5
	0.47
mean	0.000666667	-9.09333	6.61667	16.1344	-32.5475	-41.8256	-15.1944	-41.9022	-28.9411

## Sheet: DSA
DSA nanoBRET
Assay 1/2/3
Assay 1
		NanoLuc
		w/o HT Ligand			w/ Ligand			w/o HT Ligand			w/ Ligand
		MC4R WT NL /MC4R WT HT						MC4R WT NL/ CB1R HT
	Ratio 100	3973390	4567380	5417880	2061950	2965940	4089530	3736230	5375160	4167510	3489600	3513140	3610730
	Ratio 80	7459570	7711350	7461620	4136600	5119320	4806550	5213430	5821130	6046230	4165690	5344320	5480710
	Ratio 60	5741650	5675940	5932630	2852640	4291300	5493790	7491500	8489520	7729860	5075360	6008410	6818380
	Ratio 50	6174650	6927740	8983030	3474610	5059770	5951600	7839020	7910570	9386000	4770390	6153510	7285980
	Ratio 25	7643760	8004500	6122830	5399080	6489800	6357590	8485660	9881990	10047210	7407480	8899260	9303070
	Ratio 10	8336520	10601840	10603020	7424710	8600880	9391160	9259480	9242010	9384600	8032700	8518680	9530730
	Ratio 5	13546910	14073170	16832210	10893590	14770250	14215540	13082630	14964530	14294750	12289730	12801010	12901220
	Nur Carrier DN A	9448820	12615300	12188830	9310460	11186300	11455070
		HaloTag
		w/o HT Ligand			w/ Ligand			w/o HT Ligand			w/ Ligand
		MC4R WT NL /MC4R WT HT						MC4R WT NL/ CB1R HT
	Ratio 100	21700	26080	31810	271260	377800	532910	21970	32030	24640	154360	169820	182020
	Ratio 80	43970	46190	44560	552220	659060	636470	30570	34100	36030	193610	263220	287990
	Ratio 60	33280	32840	34500	345030	514520	664580	45520	51630	46920	226650	281130	335950
	Ratio 50	35160	41110	54880	440810	630510	761590	47830	47830	57380	200470	267440	342230
	Ratio 25	45000	47720	34570	591690	697950	686170	51200	59930	61020	274630	336260	375850
	Ratio 10	48210	64210	64080	670570	778580	851470	55630	55550	55830	256160	285390	315830
	Ratio 5	81000	86510	109240	791970	1108550	1048550	80160	94240	88810	239420	260020	258810
	Nur Carrier DN A	53990	75900	72780	60250	85670	90070
		NanoLuc
		w/o HT Ligand			w/ Ligand
		CB1R NL /MC4R WT HT
	Ratio 100	6730570	7665770	8386970	5254390	5516040	8214620
	Ratio 80	8079000	9225770	10813140	5783340	7742150	9119510
	Ratio 60	7656600	9984470	9321570	5484420	7216410	9372500
	Ratio 50	11020170	13025030	11285050	8565570	10044740	12248680
	Ratio 25	12293630	15944890	16590340	11202690	13392690	13727580
	Ratio 10	19625920	21715650	20659560	14648510	18412310	22642590
	Ratio 5	15050780	17065640	17101370	14040490	14404210	14221510
	Nur Carrier DN A
		HaloTag
		w/o HT Ligand			w/ Ligand
		CB1R NL /MC4R WT HT
	Ratio 100	38020	46040	50710	309600	324560	506500
	Ratio 80	47430	55590	66380	337800	463850	564760
	Ratio 60	44110	59510	55000	304530	405090	547990
	Ratio 50	66090	80660	66670	478390	565810	719260
	Ratio 25	73310	101430	106250	583150	716020	735890
	Ratio 10	127750	145670	135600	606020	804900	1076040
	Ratio 5	93230	106170	105960	355470	367760	371110
	Nur Carrier DN A
Assay 2
		NanoLuc
		w/o HT Ligand			w/ Ligand			w/o HT Ligand			w/ Ligand
		MC4R WT NL /MC4R WT HT						MC4R WT NL/ CB1R HT
	Ratio 100	1723930	1946260	1336920	877820	1070040	1162340	1227430	1523530	1833010	527320	528260	574240
	Ratio 80	2310760	2703140	3992680	1606080	1804400	3027880	934860	1157750	1388760	948050	781870	871420
	Ratio 60	1880790	2007570	3357840	1010250	1671640	2568320	1125650	1609100	1703410	1280950	1353990	1626660
	Ratio 50	1181320	1260790	1322150	872440	918720	1227730	1654850	1987000	1828080	1480270	1359300	1533090
	Ratio 25	1792450	2328460	3062960	928820	1254710	2056080	1822220	2139230	2460960	1563790	1899420	2192250
	Ratio 10	4813080	5933960	6530560	3618530	4563160	5949820	2244610	2613170	2835230	2081400	2150550	2439170
	Ratio 5	4192040	4489050	5141390	2621980	3092960	5579450	1615210	1843960	1689510	1498290	1730110	1718710
	Nur Carrier DN A	3828200	4101300	6200240	3600410	4582450	6395470
		HaloTag
		w/o HT Ligand			w/ Ligand			w/o HT Ligand			w/ Ligand
		MC4R WT NL /MC4R WT HT						MC4R WT NL/ CB1R HT
	Ratio 100	9130	10910	7270	105220	132380	142910	7130	8940	11010	20680	21170	24630
	Ratio 80	12920	15450	23310	195470	216130	368270	5250	6550	7920	35580	31180	35750
	Ratio 60	10570	11050	19380	118500	198060	308190	6360	9020	9690	49700	53660	69560
	Ratio 50	6520	7270	7550	96930	99560	133700	9450	11530	10570	54540	51050	59250
	Ratio 25	10030	13100	17500	99550	130310	217620	10280	12220	14020	48720	62030	73780
	Ratio 10	27480	34560	38470	363290	442320	584490	12460	14810	15990	50620	57810	63170
	Ratio 5	23040	25270	29450	191060	220290	398250	8930	10000	9320	18010	23520	22490
	Nur Carrier DN A	21310	22730	35400	21040	33450	55070
		NanoLuc
		w/o HT Ligand			w/ Ligand
		CB1R NL /MC4R WT HT
	Ratio 100	2750510	3056050	2971710	2008900	2802510	2949560
	Ratio 80	3093350	3902930	4357790	2388230	2870540	3275870
	Ratio 60	5133910	4742600	5253530	2638830	3266260	3386490
	Ratio 50	2955240	3588490	4651740	2833210	3335740	4111860
	Ratio 25	7151210	7358840	7767590	5507570	7124550	7509860
	Ratio 10	5177660	6304960	6458420	4131630	5051710	6719920
	Ratio 5	4386630	4984220	4909990	3979160	4665560	5070710
	Nur Carrier DN A
		HaloTag
		w/o HT Ligand			w/ Ligand
		CB1R NL /MC4R WT HT
	Ratio 100	14990	17920	17490	109320	156360	166310
	Ratio 80	17560	22800	25310	125710	154880	180120
	Ratio 60	30400	27900	31290	138170	171470	180710
	Ratio 50	16840	20320	26740	144420	170990	214710
	Ratio 25	41540	43340	45610	257060	341550	363460
	Ratio 10	28610	36250	36780	142890	173420	243480
	Ratio 5	24140	27950	27480	87060	102120	109850
Assay 3
		NanoLuc
		w/o HT Ligand			w/ Ligand			w/o HT Ligand			w/ Ligand
		MC4R WT NL /MC4R WT HT						MC4R WT NL/ CB1R HT
	Ratio 100	2648700	2963340	4089070	2141580	2278890	2446300	678460	720410	1299990	845230	765010	788180
	Ratio 80	1858560	2514560	3249550	1322500	1478180	2163820	5727120	7422200	8366270	4379860	5742600	7190660
	Ratio 60	3997380	5209370	7168590	2269610	3025940	5236330	2781570	3964990	4932610	3666640	3722230	4073930
	Ratio 50	3823960	4435390	5091070	2584410	3486310	3666590	2636090	3340500	3725770	2895080	2998090	3078380
	Ratio 25	7859540	9576070	11589240	5102590	6493780	8718670	3801480	5186440	6304510	3538920	4307600	5032480
	Ratio 10	14700150	15014340	17188650	10411810	11845900	13314820	12378820	14330830	14891440	11945300	12484880	12840830
	Ratio 5	13527270	10984440	11271720	9900300	9738180	10293540	1471860	1778430	1659630	1056920	1451880	1276460
	Nur Carrier DN A	9409990	10600780	12550060	11150120	9831670	9216640
		HaloTag
		w/o HT Ligand			w/ Ligand			w/o HT Ligand			w/ Ligand
		MC4R WT NL /MC4R WT HT						MC4R WT NL/ CB1R HT
	Ratio 100	14890	17690	24470	279900	291840	312700	3940	4300	7470	36740	34950	35730
	Ratio 80	10870	14980	19320	162650	177040	262000	35240	46890	53440	204920	277310	373990
	Ratio 60	24170	31680	45000	286500	384100	676170	16970	24420	30870	168690	175620	189730
	Ratio 50	22880	26520	31230	297290	397880	418160	15840	20210	22720	131080	139450	142600
	Ratio 25	49180	61230	75840	605910	781740	1071680	23400	31690	38840	147310	180490	226040
	Ratio 10	97530	100990	118620	1149450	1301570	1458340	81180	95950	99670	444430	483680	485500
	Ratio 5	87200	68940	70270	873350	830820	879530	9160	10420	9780	25740	34750	36080
	Nur Carrier DN A	57030	65480	79700	88260	83340	78660
		NanoLuc
		w/o HT Ligand			w/ Ligand
		CB1R NL /MC4R WT HT
	Ratio 100	3105190	4356560	5769550	3110800	3482360	3747850
	Ratio 80	2899070	4161510	5397640	2942170	3284130	3946250
	Ratio 60	2790570	3942710	4474250	2232700	2756800	3429680
	Ratio 50	6587000	9031370	9053410	5682330	6517640	7521360
	Ratio 25	4646970	6894150	8898610	4519080	6052900	7108260
	Ratio 10	7765330	10458590	13915730	7155340	10129760	12490310
	Ratio 5	12353570	16802170	20456380	17534520	18122180	18055010
	Nur Carrier DN A
		HaloTag
		w/o HT Ligand			w/ Ligand
		CB1R NL /MC4R WT HT
	Ratio 100	17610	25900	35560	195090	221150	239620
	Ratio 80	16980	24910	32630	176030	197730	242970
	Ratio 60	16410	23250	26840	131940	163720	206730
	Ratio 50	40040	57380	56920	347230	400570	469980
	Ratio 25	27450	41430	54970	225040	304300	363890
	Ratio 10	45870	64330	89680	302660	443860	567260
	Ratio 5	75990	112310	145290	686360	700690	696470
	Nur Carrier DN A
Assay 4/5/6
Assay 4
		NanoLuc
		w/o HT Ligand			w/ Ligand			w/o HT Ligand			w/ Ligand
		MC4R WT NL /MC4R WT HT						Chim 7 NL/ Chim 7 HT
	Ratio 100	6696470	5998550	5853860	2945860	3632020	5260770	10358660	11289540	14378640	8237080	10671040	10411790
	Ratio 80	7864230	6482460	10175910	4602510	6636720	7382260	2330	2310	2400	2650	2530	2560
	Ratio 60	6407100	8284880	7970480	4411330	5561260	6375510	8295810	9762010	12708230	6162110	9589970	13272140
	Ratio 50	1450110	2922980	5020140	2194940	2672910	3415340	12593000	15561960	19318450	13466870	14179300	14611390
	Ratio 25	5733160	6994690	7506570	5115220	5947740	6587430	18467230	23025090	28538000	18162130	20799490	22103030
	Ratio 10	10544860	12474050	12721170	7936270	10116660	10838140	12042120	13671810	18160880	10788590	11412520	11582100
	Ratio 5	10564890	11681520	13370590	7140820	10429530	13613920	14065010	14768690	16591050	10820290	12077160	10734480
	Nur Carrier DN A	7427750	7720820	9608030	8983240	9880380	10769100
		HaloTag
		w/o HT Ligand			w/ Ligand			w/o HT Ligand			w/ Ligand
		MC4R WT NL /MC4R WT HT						Chim 7 NL/ Chim 7 HT
	Ratio 100	37040	34660	33860	377610	459420	678650	62480	68920	92550	784520	1037960	1015900
	Ratio 80	46370	37740	62620	608430	869030	975910	260	100	190	280	350	340
	Ratio 60	36840	49460	47490	536600	673490	771750	48640	58940	79490	515400	822410	1169180
	Ratio 50	8100	16510	29170	229910	270360	348380	77390	101430	133420	1209570	1283360	1283140
	Ratio 25	33000	40980	44490	544980	607460	684410	122850	166340	228510	1512270	1763870	1867030
	Ratio 10	63160	76280	78330	735750	939100	1011310	72760	85670	120910	474910	504200	507290
	Ratio 5	61960	70900	82860	439890	661290	890050	88020	93040	109080	328520	384170	330540
	Nur Carrier DN A	41680	45010	56290	57640	75420	89860
		NanoLuc
		w/o HT Ligand			w/ Ligand
		CB1R NL /MC4R WT HT
	Ratio 100	13732890	13181260	14147330	9552990	11563130	12738880
	Ratio 80	10009210	12336540	15033820	8324190	10481960	14820670
	Ratio 60	14557890	15274490	14868170	13592040	14607020	15688960
	Ratio 50	10219680	10686520	11852550	9338330	10074970	10606670
	Ratio 25	12716770	13710880	12749060	11437990	11961050	12905720
	Ratio 10	11341910	11600450	12686750	9913910	10541890	12399240
	Ratio 5	21232040	21906470	25917240	20954560	22490330	21433780
	Nur Carrier DN A
		HaloTag
		w/o HT Ligand			w/ Ligand
		Chim 7 NL /CB1R HT
	Ratio 100	85550	85600	93170	439870	554160	661980
	Ratio 80	60420	78240	100780	370330	481910	739300
	Ratio 60	92470	99680	96360	566920	626420	688170
	Ratio 50	63020	65900	73850	329540	371450	389600
	Ratio 25	77940	85520	79790	344700	368230	416130
	Ratio 10	68760	69670	77970	200660	227040	274510
	Ratio 5	142710	151420	192370	350570	413420	390810
	Nur Carrier DN A
Assay 5
		NanoLuc
		w/o HT Ligand			w/ Ligand			w/o HT Ligand			w/ Ligand
		MC4R WT NL /MC4R WT HT						Chim 7 NL/ Chim 7 HT
	Ratio 100	3670650	3313810	3296250	2016770	2123010	2232720	5833200	7732830	9533610	5926900	6290710	6109140
	Ratio 80	3459820	3384040	3352210	2210570	2498470	2573370	8725510	11635370	15390050	7643640	10091890	11268620
	Ratio 60	5130090	4991780	4793550	2220150	2747930	4161360	10606880	13536470	15314350	10362080	11646020	11085420
	Ratio 50	3232580	3777040	4155220	1955730	2854250	3702680	9239640	11618390	11899460	6833080	8843950	11033050
	Ratio 25	3934350	4810070	4991490	2754320	3562810	3652950	11064840	13960860	14109610	8763140	10798860	11071030
	Ratio 10	3379320	4408410	5821890	3132000	3972170	3854480	9031490	12177150	15877630	10868640	10784930	10759140
	Ratio 5	3149690	4192500	5127040	3215410	3606720	3413350	8694620	11004820	10849600	8016090	8488430	8842160
	Nur Carrier DN A	7972740	7300750	7445160	5461180	6491400	7380700
		HaloTag
		w/o HT Ligand			w/ Ligand			w/o HT Ligand			w/ Ligand
		MC4R WT NL /MC4R WT HT						Chim 7 NL/ Chim 7 HAT
	Ratio 100	21560	19280	18920	271620	281780	293970	36090	48360	60990	577920	615610	600010
	Ratio 80	20630	20300	19970	285550	312000	322080	56310	77580	108780	748400	1017790	1147450
	Ratio 60	31340	30880	29260	276420	338000	522670	70880	93430	108450	1006080	1150890	1079860
	Ratio 50	20070	22780	24770	239940	341030	449140	59760	77540	79560	576410	758400	962750
	Ratio 25	23720	29380	30670	309940	393380	398010	71580	94370	94960	670530	852030	877980
	Ratio 10	19620	26450	35330	302410	378470	366730	56630	79920	109550	558090	540770	538570
	Ratio 5	18040	25090	31100	251040	278160	263170	53310	70700	69310	286760	309110	314160
	Nur Carrier DN A	49230	44370	45700	36190	49780	60770
		NanoLuc
		w/o HT Ligand			w/ Ligand
		CB1R NL /MC4R WT HT
	Ratio 100	9973180	10385440	10022840	7302410	8749160	8489310
	Ratio 80	6727660	8063720	8925550	5814730	7348550	7389780
	Ratio 60	9163180	10932550	10555670	7386690	9810250	9230250
	Ratio 50	10584390	11614360	12267210	7776190	9993850	11150600
	Ratio 25	12043210	14979270	15074020	10636310	13383030	13005630
	Ratio 10	12214130	15261630	15642750	12254750	13529850	14857870
	Ratio 5	20151510	20566800	19830060	14816240	16691480	15859250
	Nur Carrier DN A
		HaloTag
		w/o HT Ligand			w/ Ligand
		Chim 7 NL /CB1R HT
	Ratio 100	61970	67860	64850	325600	403500	387500
	Ratio 80	41300	50980	56500	236310	318310	319460
	Ratio 60	58480	71240	67730	278800	402780	373000
	Ratio 50	68160	75850	79830	282970	383320	451300
	Ratio 25	78680	101280	101900	351420	482310	460830
	Ratio 10	78230	101340	105980	302090	347520	400960
	Ratio 5	139030	143250	135820	255510	311430	284580
	Nur Carrier DN A
Assay 6
		NanoLuc
		w/o HT Ligand			w/ Ligand			w/o HT Ligand			w/ Ligand
		MC4R WT NL /MC4R WT HT						Chim 7 NL/ Chim 7 HT
	Ratio 100	6551810	7107990	7413270	3284660	4985840	4943660	22726540	22852590	22517160	19159680	17647680	16275130
	Ratio 80	5599750	8046680	8335560	5157180	5913130	6263160	22884380	23831870	22795990	19363990	17693040	16999780
	Ratio 60	4965830	6690680	6973470	4716580	5405570	5733600	26261720	27923550	28179210	23003920	20996850	19903490
	Ratio 50	8531920	11158740	11871500	6326450	7961490	7772780	30352080	29966550	30191910	24403660	24911900	22507450
	Ratio 25	12229440	15237180	16151400	9510180	11938760	11202030	30502080	30640810	30031140	28113390	25668230	23335990
	Ratio 10	11840130	18058110	22144080	13676250	15665060	15448880	36741060	37260370	35835950	32238000	33147360	29798660
	Ratio 5	14225610	19281940	21334770	14769050	18286950	19768920	35780290	35978590	36102120	32154520	32453670	30922460
	Nur Carrier DN A	16454260	21078180	23465300	17479580	19236830	18822060
		HaloTag
		w/o HT Ligand			w/ Ligand			w/o HT Ligand			w/ Ligand
		MC4R WT NL /MC4R WT HT						Chim 7 NL/ Chim 7 HT
	Ratio 100	39580	44500	46950	486110	750620	745380	177000	178690	175400	2401180	2121500	1941770
	Ratio 80	34170	50730	53590	747340	862330	906910	177140	188170	178240	2305120	2069620	1962220
	Ratio 60	30100	42690	44660	674790	776120	827820	219530	240550	245020	2769480	2464030	2293930
	Ratio 50	54670	74750	79850	896500	1149650	1109360	276830	273210	274490	2962020	3046550	2618830
	Ratio 25	82100	106420	114940	1256040	1596420	1498980	274850	275500	267120	2926840	2524380	2206300
	Ratio 10	77010	128660	169490	1609240	1854150	1830560	384080	395860	365060	2679310	2777320	2277190
	Ratio 5	94800	138350	159500	1484160	1921920	2117130	455050	468380	466900	387660	402040	361340
	Nur Carrier DN A	111060	155700	180270	148420	182490	171620
		NanoLuc
		w/o HT Ligand			w/ Ligand
		CB1R NL /MC4R WT HT
	Ratio 100	28889160	30524590	32028460	16000700	15781710	16198720
	Ratio 80	28889160	30524590	32028460	7594630	18335160	14812930
	Ratio 60	28889160	30524590	32028460	21360710	24208280	24716500
	Ratio 50	28889160	30524590	32028460	21348530	21589970	21610410
	Ratio 25	28889160	30524590	32028460	27864810	29345550	27428660
	Ratio 10	28889160	30524590	32028460	33779790	34958580	34574270
	Ratio 5	28889160	30524590	32028460	31093050	33808490	32894570
	Nur Carrier DN A
		HaloTag
		w/o HT Ligand			w/ Ligand
		Chim 7 NL /CB1R HT
	Ratio 100	243230	271190	295330	923090	927140	952680
	Ratio 80	243230	271190	295330	382800	1084950	820330
	Ratio 60	243230	271190	295330	1150690	1403600	1455090
	Ratio 50	243230	271190	295330	1146160	1173420	1181890
	Ratio 25	243230	271190	295330	1389810	1530610	1354990
	Ratio 10	243230	271190	295330	1407000	1571000	1540510
	Ratio 5	243230	271190	295330	837890	1062910	1002650
	Nur Carrier DN A
Assay 7/8/9
Assay 7
		NanoLuc
		w/o HT Ligand			w/ Ligand			w/o HT Ligand			w/ Ligand
		MC4R WT NL /MC4R WT HT						H158R NL/ H158R HT
	Ratio 100	1949400	2347850	2286890	1251810	1428400	1813680	5793850	7049180	6927140	4067880	4525990	4368950
	Ratio 80	3117670	3850650	3887860	2576710	2772870	2829250	1587010	2241560	2232090	1551590	1522160	1317820
	Ratio 60	2695550	3095770	3492820	2049220	2264700	2355330	3908530	4609640	5209240	3237730	3487360	3250840
	Ratio 50	2763690	3635130	4017990	1965950	2783860	3457050	6109390	8446610	9204760	5821030	6616840	6346190
	Ratio 25	3543900	4126720	5548470	3327600	3624780	4102070	3284550	3224300	3175280	2453540	2976020	2519110
	Ratio 10	6786860	7327510	7766950	5109670	5554120	6693630	8538930	10573370	10091320	7777990	8554290	8402830
	Ratio 5	7665420	9948270	10526600	7176860	8236510	8509060	7593910	7655120	7252470	6643240	7564750	7073710
	Nur Carrier DN A	6513310	8110180	8821460	6632270	7594560	8273520
		HaloTag
		w/o HT Ligand			w/ Ligand			w/o HT Ligand			w/ Ligand
		MC4R WT NL /MC4R WT HT						H158R NL/ H158R HT
	Ratio 100	10710	13310	13110	152950	170120	220840	35000	43100	42340	486170	535260	512130
	Ratio 80	17900	22420	23020	317520	333230	343360	9270	12970	13030	174330	165140	143950
	Ratio 60	15680	18060	20380	241920	261780	272440	23040	27170	31450	360620	380850	357750
	Ratio 50	16220	21040	23610	227610	321710	397960	36900	53520	58700	649940	739820	706320
	Ratio 25	20840	24150	33230	361810	380860	431100	19660	19490	18820	216800	275740	224980
	Ratio 10	40810	44380	47470	460780	492620	603230	52160	67320	63730	570690	632490	621860
	Ratio 5	45950	61390	65730	491590	568190	581450	46190	46710	43570	307720	360840	327580
	Nur Carrier DN A	38160	48840	53200	43960	57730	68090
		NanoLuc
		w/o HT Ligand			w/ Ligand
		H158R NL /CB1R HT
	Ratio 100	2771070	3109550	3544480	2360340	2856350	3093200
	Ratio 80	2102190	2363860	2729790	2423260	2617170	2671580
	Ratio 60	2395550	3051330	3356490	2261880	2756120	3102360
	Ratio 50	4070280	4835290	4789580	3876530	4251190	4421320
	Ratio 25	5926640	7856720	8282880	7287140	7521920	7749790
	Ratio 10	7829600	8960350	9601400	8660230	8563840	8227560
	Ratio 5	10517720	12844670	12980940	11056730	12460300	11840990
	Nur Carrier DN A
		HaloTag
		w/o HT Ligand			w/ Ligand
		H158R NL /CB1R HT
	Ratio 100	15790	18440	20990	91510	119240	131350
	Ratio 80	12090	13590	15990	98570	109100	113020
	Ratio 60	13560	17940	19690	85380	109640	123470
	Ratio 50	24210	29360	28630	149740	167430	174280
	Ratio 25	36270	48990	51590	261770	276360	283580
	Ratio 10	48280	55850	60250	261700	265420	255160
	Ratio 5	65480	82310	84690	229990	280110	259520
	Nur Carrier DN A
Assay 8
		NanoLuc
		w/o HT Ligand			w/ Ligand			w/o HT Ligand			w/ Ligand
		MC4R WT NL /MC4R WT HT						H158R NL/ H158R HT
	Ratio 100	3534200	4333350	4585960	2565730	3059210	3138820	9786560	11754740	11667730	7749950	8356820	5638510
	Ratio 80	5538470	6900090	8032680	4236310	5137060	6315020	6872130	7662180	7266290	6374590	4760600	4896810
	Ratio 60	4995060	6520180	7324740	5078110	5417350	5933580	12589170	14782370	14979040	9584690	10063680	9875940
	Ratio 50	1754140	1994590	1837020	1041140	1301330	1449920	10322720	12734460	12808380	10043530	10655530	10571980
	Ratio 25	8080900	10327960	12303300	6348050	8675580	10833160	17502610	18977500	19447300	14507010	14680670	13877710
	Ratio 10	9683540	12428120	13234220	8324380	9677220	9269800	9930820	13963510	15319700	8973670	11167540	12029390
	Ratio 5	6870560	7402930	8274000	5641560	6183570	6283580	22911910	23611810	22196130	15126340	18306230	18785610
	Nur Carrier DN A	10644930	12741770	14676820	16266240	16955700	16232500
		HaloTag
		w/o HT Ligand			w/ Ligand			w/o HT Ligand			w/ Ligand
		MC4R WT NL /MC4R WT HT						H158R NL/ H158R HT
	Ratio 100	19350	25520	26790	307920	375870	390980	60930	75840	74540	1007010	1116820	701490
	Ratio 80	32350	40900	48640	560730	659870	822150	41530	46430	43480	777850	586640	605520
	Ratio 60	29020	39310	44610	656430	698280	765050	82540	100020	101030	1271070	1324910	1293350
	Ratio 50	10150	11640	10740	137770	169770	192090	65980	82910	84230	1268210	1340490	1319000
	Ratio 25	49190	66150	80270	721370	990760	1249620	121730	135220	138540	1682690	1685710	1580070
	Ratio 10	59000	79630	85760	861510	990610	934900	62550	91220	102610	687180	883390	977690
	Ratio 5	39830	43440	49740	386990	426010	426520	170210	176800	162850	743570	949280	989640
	Nur Carrier DN A	64670	80250	96060	134060	157310	149700
		NanoLuc
		w/o HT Ligand			w/ Ligand
		H158R NL /CB1R HT
	Ratio 100	4458980	4518100	4928070	2983700	4050400	4054830
	Ratio 80	4467540	5421850	5803960	3636250	4761880	4461270
	Ratio 60	4559550	5420210	5654800	3837770	4234500	4129320
	Ratio 50	6524190	8538580	9220190	6888750	7360820	7583490
	Ratio 25	8832280	10513200	11141960	7968780	8827970	9263990
	Ratio 10	13481080	16565670	17553460	14364250	15601780	15442550
	Ratio 5	17285450	19675020	21793290	17941970	19470750	18879120
	Nur Carrier DN A
		HaloTag
		w/o HT Ligand			w/ Ligand
		H158R NL /CB1R HT
	Ratio 100	25560	26900	29800	123100	171810	180590
	Ratio 80	25920	32320	34340	145140	202790	191760
	Ratio 60	26510	31890	33500	157750	178460	174610
	Ratio 50	39280	52700	57230	271610	311260	322630
	Ratio 25	54020	66170	70530	306680	361030	373880
	Ratio 10	86900	110690	120280	458010	527460	507560
	Ratio 5	115550	136720	156950	391230	445720	430600
	Nur Carrier DN A
Assay 9
		NanoLuc
		w/o HT Ligand			w/ Ligand			w/o HT Ligand			w/ Ligand
		MC4R WT NL /MC4R WT HT						H158R NL/ H158R HAT
	Ratio 100	1327860	1494230	1516710	981290	1165700	1191170	2500870	2865510	2988380	1951790	2235170	2150190
	Ratio 80	1412330	1670910	1518930	841670	1136280	1284490	3079250	3385880	4021390	2215840	2839690	2780500
	Ratio 60	407640	435290	469370	274580	355380	425220	1909670	2601850	2883670	1844150	2152040	2200340
	Ratio 50	2046400	2226850	2220900	1022820	1411430	2014010	3250370	4147320	4694500	2711660	3192210	3500040
	Ratio 25	3193000	3399970	3618320	1997470	2611580	3136130	3512860	4019070	4247370	2835510	3189900	3296530
	Ratio 10	5333470	5586750	6024310	3389820	4191760	5694970	6086490	6690150	6871800	6610150	7013410	6656190
	Ratio 5	7046180	7286550	7602590	5691620	6445680	6841590	6254300	6699370	7207470	5774730	6164220	6047800
	Nur Carrier DN A	6319570	7302290	8631350	5064450	6348010	7880470
		HaloTag
		w/o HT Ligand			w/ Ligand			w/o HT Ligand			w/ Ligand
		MC4R WT NL /MC4R WT HT						H158R NL/ H158R HAT
	Ratio 100	7810	8800	9090	114580	132570	134400	14880	17060	17720	213480	237460	227080
	Ratio 80	8270	9980	8950	97030	127480	144650	18520	20210	24140	234530	296030	286850
	Ratio 60	2480	2770	3040	28940	37900	44840	12110	16250	17970	203100	230710	235130
	Ratio 50	12320	13600	13650	115960	157870	223980	20270	25510	29390	272570	318750	345080
	Ratio 25	19060	20500	22240	206960	266250	317260	21980	24750	26650	258280	281080	290740
	Ratio 10	31970	34090	36640	308610	375480	517980	38260	41780	43390	480900	505660	472670
	Ratio 5	42320	44120	46690	452690	512690	540560	38050	40920	44030	269150	287750	277360
	Nur Carrier DN A	36930	43200	51870	31650	43980	64120
		NanoLuc
		w/o HT Ligand			w/ Ligand
		H158R NL /CB1R HT
	Ratio 100	2995720	3079980	4254320	2470470	2923810	2924620
	Ratio 80	3122520	4699510	5426970	3357820	4036110	4222680
	Ratio 60	3674090	5350490	6454620	3952850	4671730	4927490
	Ratio 50	4642060	6282010	7937730	5654700	6129340	6017850
	Ratio 25	8688610	11515540	13575910	8722590	10378590	11365150
	Ratio 10	11847280	15042270	15467440	11003160	13633970	14678820
	Ratio 5	13276020	17535860	19498720	14031370	16568580	16256680
	Nur Carrier DN A
		HaloTag
		w/o HT Ligand			w/ Ligand
		H158R NL /CB1R HT
	Ratio 100	16390	18060	25380	100780	120090	125220
	Ratio 80	18130	27880	32770	138460	176310	185900
	Ratio 60	21040	31820	39020	161990	198780	219630
	Ratio 50	27260	37060	48640	233140	265610	259700
	Ratio 25	53260	72980	88480	354720	440620	512090
	Ratio 10	72930	99020	102400	358130	484130	545140
	Ratio 5	83430	117680	135260	304910	398190	398080
	Nur Carrier DN A

## Sheet: BRET_Ratio_DSA
BRET Ratio DSA
Assay1,2,3
		Assay 1
			background		corrected BRET Ratio [mBU]				background		corrected BRET Ratio [mBU]				background		corrected BRET Ratio [mBU]
		MC4RNL+MC4RHT						MC4R NL+CB1R HT						CB1R NL+MC4R HT
		Ratio 100	0.0056809		125.874	121.699	124.63	Ratio 100	0.00591718		38.3171	42.4213	44.4937	Ratio 100	0.00590035		53.0218	52.939	55.758
		Ratio 80	0.00595207		127.815	123.059	126.736	Ratio 80	0.00589359		40.5601	43.3351	46.6289	Ratio 80	0.00601171		52.5088	54.0119	56.0284
		Ratio 60	0.00579912		115.27	114.218	115.288	Ratio 60	0.00607593		38.7397	40.8722	43.354	Ratio 60	0.00587386		49.626	50.2342	52.5675
		Ratio 50	0.00591255		121.185	118.931	122.283	Ratio 50	0.00608708		36.1066	37.5442	41.0538	Ratio 50	0.00603256		49.95	50.4286	52.8211
		Ratio 25	0.00583163		103.91	101.865	102.248	Ratio 25			31.1575	31.868	34.4835	Ratio 25	0.00624296		46.1541	47.5631	47.7063
		Ratio 10	0.00596102		84.6351	84.8424	84.9863	Ratio 10			25.9725	27.5845	27.2209	Ratio 10	0.00659362		35.4704	37.815	41.6225
		Ratio 5	0.00620544		67.0197	69.372	68.0799	Ratio 5			13.5641	14.3953	14.1437	Ratio 5	0.00620388		19.4171	19.6311	20.1946
		Nur Carrier DN A	0.0059005		0.79032	1.97758	2.182
		Assay 2
			background		corrected BRET Ratio [mBU]				background		corrected BRET Ratio [mBU]				background		corrected BRET Ratio [mBU]
		MC4RNL+MC4RHT						MC4R NL+CB1R HT						CB1R NL+MC4R HT
		Ratio 100	0.00544651		114.419	118.268	117.504	Ratio 100	0.00589445		33.3227	34.1805	36.997	Ratio 100	0.00573306		48.6848	50.0598	50.6516
		Ratio 80	0.005715		116.26	114.333	116.18	Ratio 80	0.00565876		31.6352	33.9843	35.1305	Ratio 80	0.00577548		46.9042	48.2219	49.2508
		Ratio 60	0.0056319		111.851	113.036	114.55	Ratio 60	0.00564809		32.9049	33.7366	36.868	Ratio 60	0.00592009		46.6273	46.7643	47.629
		Ratio 50	0.00566529		105.656	102.922	103.454	Ratio 50	0.00576508		30.9502	31.6616	32.753	Ratio 50	0.0057031		45.2409	45.5269	46.4842
		Ratio 25	0.00564505		101.732	98.4102	100.396	Ratio 25	0.00568359		25.2606	26.7629	27.7605	Ratio 25	0.00585672		40.9409	42.2068	42.6646
		Ratio 10	0.0058081		94.9506	91.4863	92.7901	Ratio 10	0.00561943		18.4257	20.987	20.0037	Ratio 10	0.00565667		28.8514	28.5959	30.4995
		Ratio 5	0.0056178		67.4221	65.7765	65.9315	Ratio 5	0.0054894		6.12592	7.70006	7.19095	Ratio 5	0.00556918		16.1459	16.155	15.9306
		Nur Carrier DN A	0.00560606		0.397268	1.85308	3.16427
		Assay 3
			background		corrected BRET Ratio [mBU]				background		corrected BRET Ratio [mBU]				background		corrected BRET Ratio [mBU]
		MC4RNL+MC4RHT						MC4R NL+CB1R HT						CB1R NL+MC4R HT
		Ratio 100	0.0058585		124.839	122.204	121.967	Ratio 100	0.00584076		37.6267	39.8449	39.4915	Ratio 100	0.00592653		56.7872	57.5792	58.0088
		Ratio 80	0.00591712		117.128	113.91	115.224	Ratio 80	0.00628609		40.9461	42.4492	46.1698	Ratio 80	0.0059627		53.9035	54.2812	55.6433
		Ratio 60	0.00613507		120.375	121.077	123.272	Ratio 60	0.00617271		40.1659	41.3406	40.731	Ratio 60	0.00592542		53.1678	53.4612	54.3502
		Ratio 50	0.00603226		109.174	108.268	108.188	Ratio 50	0.00605232		39.4361	40.6722	40.4823	Ratio 50	0.00623973		55.1804	55.5328	56.5595
		Ratio 25	0.00639848		112.887	114.524	117.059	Ratio 25	0.00614211		35.7849	36.0596	39.0755	Ratio 25	0.0060313		43.8712	44.3469	45.266
		Ratio 10	0.00675398		104.54	104.017	103.669	Ratio 10	0.00664881		31.3647	32.9005	31.9683	Ratio 10	0.00616749		36.3719	37.8909	39.4895
		Ratio 5	0.00631886		82.356	79.4572	79.5864	Ratio 5	0.0059918		18.513	18.0937	22.4249	Ratio 5	0.00664598		33.2168	32.7382	32.6484
		Nur Carrier DN A	0.00619602		2.05711	2.61819	2.67607
Assay 4,5,6
		Assay 4
			background		corrected BRET Ratio [mBU]				background		corrected BRET Ratio [mBU]				background		corrected BRET Ratio [mBU]
		Chim7 NL+Chim7 HT						Chim7 NL+ Chim7 HT						Chim7 NL+CB1R HT
		Ratio 100	0.00569785		122.485	120.794	123.304	Ratio 100	0.00619102		89.0515	91.0778	91.3811	Ratio 100	0.00643644		39.6088	41.4883	45.5289
		Ratio 80	0.00595731		126.497	125.245	126.499	Ratio 80	0.0780149		99.4694	132.149	126.621	Ratio 80	0.00636071		38.052	39.5387	43.4466
		Ratio 60	0.00589267		115.943	115.406	115.351	Ratio 60	0.00605196		77.4492	79.5663	81.9018	Ratio 60	0.00645292		35.2733	36.4484	37.4269
		Ratio 50	0.00568157		99.0476	95.4503	96.3066	Ratio 50	0.00652322		83.6272	84.3184	81.6268	Ratio 50	0.00618797		28.8525	30.4322	30.2952
		Ratio 25	0.00584718		100.843	96.4351	98.1985	Ratio 25	0.00729461		77.074	78.6125	78.2784	Ratio 25	0.00620827		23.7	24.3493	25.8074
		Ratio 10	0.0060874		87.0094	87.1292	87.6124	Ratio 10	0.00632201		37.8286	37.9885	37.6085	Ratio 10	0.00607135		13.8038	15.1005	15.7028
		Ratio 5	0.00604377		55.9043	57.7077	59.6801	Ratio 5	0.00637751		24.1705	25.6186	24.6013	Ratio 5	0.00701868		10.2936	11.9457	11.7969
		Nur Carrier DN A	0.00576657		0.718542	1.93546	2.64639
		Assay 5
			background		corrected BRET Ratio [mBU]				background		corrected BRET Ratio [mBU]				background		corrected BRET Ratio [mBU]
		Chim7 NL+Chim7 HT						Chim7 NL+ Chim7 HT						Chim7 NL+CB1R HT
		Ratio 100	0.00581052		128.87	126.916	125.854	Ratio 100	0.00627941		91.2286	91.5808	91.9357	Ratio 100	0.00640601		38.182	39.7127	39.2396
		Ratio 80	0.00597292		123.364	119.066	119.348	Ratio 80	0.00672976		91.6321	94.5729	95.5476	Ratio 80	0.00626371		34.2339	36.91	36.824
		Ratio 60	0.00613309		118.695	117.191	119.79	Ratio 60	0.00688871		90.8131	92.5432	91.1332	Ratio 60	0.00643828		31.3376	34.651	34.0046
		Ratio 50	0.00606701		116.875	113.671	115.491	Ratio 50	0.00660923		78.0764	79.4741	80.9811	Ratio 50	0.00649266		29.9833	31.9496	34.0671
		Ratio 25	0.00609381		106.718	104.602	103.145	Ratio 25	0.00665297		70.2377	72.6206	73.0249	Ratio 25	0.00668482		26.6336	29.6329	29.0271
		Ratio 10	0.00595809		90.7444	89.4699	89.3333	Ratio 10	0.00657768		45.0692	43.8619	43.7776	Ratio 10	0.00660669		18.2448	19.2794	20.5804
		Ratio 5	0.00592597		72.2635	71.3122	71.2897	Ratio 5	0.0063147		29.4936	30.136	29.2504	Ratio 5	0.00690451		10.8393	12.252	11.5381
		Nur Carrier DN A	0.00613015		0.816256	1.85809	2.42312
		Assay 6
			background		corrected BRET Ratio [mBU]				background		corrected BRET Ratio [mBU]				background		corrected BRET Ratio [mBU]
		Chim7 NL+Chim7 HT						Chim7 NL+ Chim7 HT						Chim7 NL+CB1R HT
		Ratio 100	0.00621163		141.782	144.339	144.563	Ratio 100	0.00779904		117.526	112.415	111.51	Ratio 100	0.00884153		48.8491	49.9062	49.9705
		Ratio 80	0.00627853		138.701	139.621	138.589	Ratio 80	0.00781843		111.243	109.175	107.627	Ratio 80	0.00884153		41.5625	50.3317	46.5378
		Ratio 60	0.00628207		136.856	137.366	138.169	Ratio 60	0.00855632		112.593	109.553	107.454	Ratio 60	0.00884153		45.0279	49.1386	50.0297
		Ratio 50	0.00661089		135.495	138.19	136.512	Ratio 50	0.00910977		113.577	114.494	108.555	Ratio 50	0.00884153		44.8465	45.5087	45.8492
		Ratio 25	0.00693798		125.862	127.506	127.602	Ratio 25	0.00896563		96.3094	90.5474	86.7459	Ratio 25	0.00884153		41.0354	43.3166	40.559
		Ratio 10	0.0070943		111.455	112.151	112.28	Ratio 10	0.0104216		75.3113	75.988	68.6202	Ratio 10	0.00884153		32.8106	36.0974	35.715
		Ratio 5	0.00710507		94.2796	98.8863	100.882	Ratio 5	0.0128897		4.25712	4.58908	3.88632	Ratio 5	0.00884153		18.1063	22.5976	21.6392
		Nur Carrier DN A	0.00727294		2.27943	3.27486	2.9064
Assay 7,8,9
		Assay 7
			background		corrected BRET Ratio [mBU]				background		corrected BRET Ratio [mBU]				background		corrected BRET Ratio [mBU]
		MC4RNL+MC4RHT						H158R NL+ H158R HT						H158R NL+CB1R HT
		Ratio 100	0.0056319		116.551	113.466	116.132	Ratio 100	0.00608909		113.425	112.175	111.131	Ratio 100	0.00585005		32.9198	35.8955	36.6141
		Ratio 80	0.00582829		117.595	114.543	115.729	Ratio 80	0.00582163		106.267	102.401	103.144	Ratio 80	0.00578594		34.8266	35.8362	36.4545
		Ratio 60	0.00582853		112.423	109.96	110.038	Ratio 60	0.00594211		105.291	103.12	103.959	Ratio 60	0.00580205		31.8973	33.9305	33.9487
		Ratio 50	0.00584433		110.144	109.931	109.484	Ratio 50	0.0062511		105.565	105.72	105.209	Ratio 50	0.00599919		32.7773	33.5342	33.568
		Ratio 25	0.00590722		103.098	99.4393	99.4614	Ratio 25	0.00598579		82.273	86.5649	83.2202	Ratio 25	0.00619459		30.0721	30.8906	30.7419
		Ratio 10	0.0060605		84.5461	83.0626	84.4881	Ratio 10	0.00626359		67.2833	67.8493	67.9169	Ratio 10	0.00622483		24.3685	25.1431	25.1628
		Ratio 5	0.00613652		62.8646	63.3524	62.7012	Ratio 5	0.00606397		40.2317	41.6111	40.2204	Ratio 5	0.00638599		14.9509	16.6301	16.067
		Nur Carrier DN A	0.00597053		0.996301	1.9696	2.59797
		Assay 8
			background		corrected BRET Ratio [mBU]				background		corrected BRET Ratio [mBU]				background		corrected BRET Ratio [mBU]
		MC4RNL+MC4RHT						H158R NL+ H158R HT						H158R NL+CB1R HT
		Ratio 100	0.00573534		114.277	117.13	118.827	Ratio 100	0.00635544		123.582	127.286	118.055	Ratio 100	0.00591102		35.3465	36.507	38.626
		Ratio 80	0.00594123		126.627	122.718	124.454	Ratio 80	0.00602889		115.668	116.873	117.301	Ratio 80	0.00589319		34.0037	36.6751	37.0723
		Ratio 60	0.00597634		123.531	123.162	123.2	Ratio 60	0.00668912		126.259	125.297	124.604	Ratio 60	0.00587396		35.1936	36.2333	36.3744
		Ratio 50	0.00582284		126.591	124.723	126.748	Ratio 50	0.00649286		119.916	119.447	118.408	Ratio 50	0.00613323		33.517	36.375	36.6327
		Ratio 25	0.0063388		107.901	108.466	109.616	Ratio 25	0.00706804		109.636	108.47	107.501	Ratio 25	0.00624677		32.5742	34.9851	34.4474
		Ratio 10	0.00632674		97.7571	96.6298	95.119	Ratio 10	0.00650974		70.2219	72.7479	74.9197	Ratio 10	0.00666006		25.9744	27.8967	26.9566
		Ratio 5	0.00589225		62.8609	63.1585	62.1432	Ratio 5	0.00741784		42.8019	45.5001	46.3253	Ratio 5	0.00694516		15.8943	16.9807	16.8972
		Nur Carrier DN A	0.00630613		2.50627	3.54236	3.4869
		Assay 9
			background		corrected BRET Ratio [mBU]				background		corrected BRET Ratio [mBU]				background		corrected BRET Ratio [mBU]
		MC4RNL+MC4RHT						H158R NL+ H158R HT						H158R NL+CB1R HT
		Ratio 100	0.0058585		124.839	122.204	121.967	Ratio 100	0.00584076		37.6267	39.8449	39.4915	Ratio 100	0.00592653		56.7872	57.5792	58.0088
		Ratio 80	0.00591712		117.128	113.91	115.224	Ratio 80	0.00628609		40.9461	42.4492	46.1698	Ratio 80	0.0059627		53.9035	54.2812	55.6433
		Ratio 60	0.00613507		120.375	121.077	123.272	Ratio 60	0.00617271		40.1659	41.3406	40.731	Ratio 60	0.00592542		53.1678	53.4612	54.3502
		Ratio 50	0.00603226		109.174	108.268	108.188	Ratio 50	0.00605232		39.4361	40.6722	40.4823	Ratio 50	0.00623973		55.1804	55.5328	56.5595
		Ratio 25	0.00639848		112.887	114.524	117.059	Ratio 25	0.00614211		35.7849	36.0596	39.0755	Ratio 25	0.0060313		43.8712	44.3469	45.266
		Ratio 10	0.00675398		104.54	104.017	103.669	Ratio 10	0.00664881		31.3647	32.9005	31.9683	Ratio 10	0.00616749		36.3719	37.8909	39.4895
		Ratio 5	0.00631886		82.356	79.4572	79.5864	Ratio 5	0.0059918		18.513	18.0937	22.4249	Ratio 5	0.00664598		33.2168	32.7382	32.6484
		Nur Carrier DN A	0.00619602		2.05711	2.61819	2.67607

## Sheet: Bmax_Kd_DSA
Bmax und Kd DSA
Assay 1,2,3
Assay 4,5,6
Assay 7,8,9
		Bmax								Kd
		WT	WT+CB1R	CB1R+WT	Chim7	Chim7+CB1R	H158R	H158R+CB1R		WT	WT+CB1R	CB1R+WT	Chim7	Chim7+CB1R	H158R	H158R+CB1R
	20210820	129.2	46.81	58.49						4.967	9.531	7.08
	20210901	118.3	40.49	54.79						3.571	13.64	9.552
	20210903	124.8			104.6	51.65				5.483			14.07	3.784
	20210929	127.1			106.8	41.77				4.132			13.29	12.47
	20211101	143.5			136.2	51.77				2.532			14.75	6.137
	20211130	120.4					119.8	37.52		4.523					8.91	5.956
	20211202	130.7					137.4	39.39		4.541					8.767	5.523
	20211107	109					109.9	39.92		2.62					7.609	4.64
	20211217	122.3	43.94	58.23						2.301	4.92	4.715

## Sheet: NFAT_summary fold over basal
		WT fold over basal
		Emax at 1µM	SEM
	alpha-MSH	8.65914	0.688135
	RM-493	8.7859	0.782347
		fold over WT basal
		Assay 1			Assay 2			Assay 3			Assay 4			Assay 5			Assay 6			Assay 7			Assay 8			Assay 9			Assay 13A/B			Assay 14A/B			Asssay 15A/B			Assay 16A/B			Assay 17 A/B			Assay 18A/B			Assay 19A/B
	WT 10-6M alpha-MSH	18.9082	15.5898	16.3011	4.31234	1.3771	2.55955	16.4083	2.35141	2.88978	7.76626	4.59855	6.9243	12.5093	6.17442	9.06722													13.4326	10.4679	11.7408	6.01912	8.5759	2.9635							2.46798	6.51439	2.79514	4.75114	3.8292	3.0284	11.5462	8.17904	15.6518
	WT 10-6M alpha-MSH				17.4159	7.42573	4.57313	1.10791	11.2159	15.8303	10.3842	10.1016	7.77247	8.78722	5.2858	15.2675
	WT 10-6M alpha-MSH				8.64349	3.07899	13.2984	3.97777	12.1891	3.25929	6.48718	8.75976	5.00643	16.4788	18.2816	13.2645
		fold over WT basal
		Assay 1			Assay 2			Assay 3			Assay 4			Assay 5			Assay 6			Assay 7			Assay 8			Assay 9			Assay 10			Assay 11			Assay 12			Assay 13A/B			Assay 14A/B			Assay 15A/B			Assay 16A/B
	WT 10-6M RM-493	10.2842	14.5376	16.4357	4.9708	6.33131	6.32094	5.09143	3.68207	12.5795	6.02157	10.0996	6.59123																9.2684	10.6105	6.33096	8.27341	4.93361	2.13316	5.63141	3.80644	3.98707	15.4051	17.1206	15.2826	7.63205	4.91988	6.37721	8.18571	6.48861	5.33287	1.7091	2.17779	3.17947
	WT 10-6M RM-494				35.0935	30.0925	19.5799	11.7717	8.81848	2.5931	9.10902	11.1733	10.6819																13.6327	12.4759	12.3055	3.81965	2.99255	3.02651	4.44498	4.7374	3.12801
	WT 10-6M RM-495				9.15466	19.1198	22.5008	5.48181	1.95946	3.2694	13.4757	10.2336	11.9053
		WT fold over 1µM (%)
		Emax 1µM	SEM
	alpha-MSH	100	6.78377
	RM-493	100	4.61201
		fold over WT 1µM
		Assay 1			Assay 2			Assay 3			Assay 4			Assay 5			Assay 6			Assay 7			Assay 8			Assay 9			Assay 13A/B			Assay 14A/B			Asssay 15A/B			Assay 16A/B			Assay 17 A/B			Assay 18A/B			Assay 19A/B
	WT 10-6M alpha-MSH	111.665	92.0673	96.268	61.9148	19.7719	36.749	213.31	30.5687	37.5676	103.091	61.042	91.9145	107.104	52.865	77.633													113.065	88.1106	98.8244	102.841	146.525	50.6335							62.865	165.936	71.1987	122.782	98.9565	78.2617	97.9128	69.3589	132.728
	WT 10-6M alpha-MSH				250.05	106.616	65.6592	14.4031	145.809	205.797	137.841	134.091	103.173	75.2357	45.2567	130.719
	WT 10-6M alpha-MSH				124.1	44.2069	190.933	51.7118	158.461	42.3713	86.1121	116.279	66.4563	141.09	156.526	113.57
		fold over WT 1µM
		Assay 1			Assay 2			Assay 3			Assay 4			Assay 5			Assay 6			Assay 7			Assay 8			Assay 9			Assay 10			Assay 11			Assay 12			Assay 13A/B			Assay 14A/B			Assay 15A/B			Assay 16A/B
	WT 10-6M RM-493	74.7807	105.708	119.511	29.2087	37.2031	37.1421	82.9418	59.9827	204.926	60.6936	101.798	66.4355																86.0524	98.513	58.7798	197.151	117.565	50.8322	131.292	88.7445	92.9556	96.6679	107.433	95.8993	120.957	77.9731	101.07	122.742	97.2942	79.9642	72.5594	92.4572	134.983
	WT 10-6M RM-494				206.211	176.825	115.052	191.767	143.657	42.2428	91.8133	112.62	107.667																126.572	115.833	114.25	91.0204	71.3108	72.1201	103.631	110.449	72.9274
	WT 10-6M RM-495				53.7932	112.349	132.216	89.3014	31.9205	53.26	135.826	103.148	119.998
[truncated: 11 more columns]

## Sheet: raw data_basal-stim all ligands
	Assay 1 (alphaMSH A/B, Setmelanotide C/D)
								1A, 1C
								1B, 1D
	1A
	220260	158560	350370	115510	176080	125170	164390	256550	312470	101270	114450	144970
	5653250	3712430	5367610	311260	229360	136330	489200	399630	526650	2791750	3798550	4031190
	4595890	3789300	3962190	86060	110990	153340	456480	383730	691460	2671610	1732130	3420420
	1871880	1772020	2536790	136540	150680	90280	609590	275590	510650	1549550	1794300	3133880
	276280	516610	278340	186420	195110	147560	159400	190650	172370	153550	142320	283170
	469110	254770	361900	91910	128230	435710	139540	218940	309780	74010	85280	83720
	359650	366240	291900	102950	81520	208170	131850	200580	203490	62150	63840	129860
	46090	53280	41550	63970	57860	47610	607910	683660	528510	670	2960	1270
	1B
	206820	193250	170050	108400	129250	129420	227690	145680	107350	72460	15230	520
	510	540	580	510	510	630	590	640	920	1823050	4037790	3768780
	928310	1132520	1283240	2865610	3268570	2867010	1600290	2544710	4436320	2651420	3469110	3246660
	1402040	836920	733520	2083520	2817380	3581240	1782850	2493260	2891340	2020720	3231950	3009330
	388400	381320	333160	544300	825370	959190	1142470	1688730	2192650	1678900	1793790	1456390
	147640	176170	135710	188490	136310	264190	269700	280370	378020	266760	716440	449060
	288200	233440	141030	90920	84220	102100	88590	193340	93230	110440	124970	121440
	560	510	470	430	470	490	530	540	500	510	540	520
	1C
	437720	166780	341480	176450	199830	232370	212580	450210	226360	139170	131930	194580
	3945550	4702330	5343220	96150	144580	178540	399820	484810	647920	4254570	3339540	3683780
	3242890	4584080	5182630	152920	270080	187340	585580	441970	659990	3380880	3579040	5515050
	4628050	4976510	5751900	181580	167150	293280	1085840	967130	558910	3570200	3623640	3711500
	2642950	3261630	4002890	127910	123520	161930	574080	534470	659660	3092840	4414260	4576030
	1092720	1604510	1901280	116020	82860	233890	337070	197580	322360	2095910	2550960	2804300
	368850	344630	510240	208970	291810	239950	136090	164830	194770	142880	149910	151570
	26370	57140	22900	27720	36910	34910	775350	675890	780570	920	1330	1030
	1D
	194730	158920	145360	117350	106080	170930	612930	386920	518290	482310	468130	653480
	913390	1666490	1486310	2543470	2034400	2931400	1313400	2061730	1348490	1860150	1867140	1758860
	1488510	1382070	1443060	1731420	1798870	3372850	1760520	1977070	1943480	2056730	2445740	3128460
	1565490	1844520	1503840	2092990	2943280	2725640	2170500	1758060	1269070	3280910	2268820	3657610
	1966640	1149170	1509900	1171740	1820660	2953110	1995710	1498290	1367230	2545250	3956230	4246490
	859930	931720	426240	1475790	1422530	1709390	1161610	986100	1182150	2885940	2870480	2975640
	618990	379010	519370	495960	592720	370480	1017170	677180	452660	1263640	1793690	1368400
	570	660	690	660	670	580	650	650	690	800	860	650
	Assay 2,3								2A,2C		A,B alphaMSH
									3A,3C		C,D seltmelanotide
									4A,4C
									5A,5C
									2B,2D
									3B,3D
									4B,4D
									5B,5D
	2A
	78610	63870	44830	68570	42730	67470	72380	28280	35380	75470	42510	62650
	839220	299510	603380	383570	788010	539580	576870	494220	1705800	1993080	1445720	3285010
	240590	76830	142800	971650	414290	255140	482230	171780	741930	1515530	813740	2241240
	185050	81220	91080	256180	186750	120770	355170	334270	1259870	1844540	717040	1312290
	123690	23270	50050	43200	73740	79620	159290	234830	310690	427450	253880	356070
	22460	35680	26190	54540	72210	96260	69290	49780	150410	82350	62170	460290
	52330	57460	43740	42760	79750	40800	38560	43290	192860	53630	105260	81090
	23380	25790	32520	19250	20880	34090	486670	482430	388640	530	700	400
	2B
	170800	164310	149560	87960	58630	88470	42810	65980	73690	90060	53050	80450
	2221660	2098100	2219620	1945530	2889860	1236970	2293640	3210530	3576810	3559890	3847640	4469240
	1952640	1862600	2452580	1452430	741690	1420340	2928110	3814750	2650030	2048290	2571630	4375140
	1940840	1440470	1272960	1359560	1988580	1301740	3258140	3652750	2688350	2218770	3310720	3403530
	1471480	1184280	1369900	1036570	1159710	1463950	2984250	2133660	2322490	1536950	1654860	3037660
	367310	256750	292780	432700	251210	120910	880050	674290	514980	344460	1150660	1106930
	118670	97330	99940	83790	73570	68040	216010	112110	122300	71550	78230	246900
	490	520	500	500	450	540	470	500	500	510	500	480
	2C
	24590	57740	73670	89580	75970	75090	69190	107180	173580	86190	79500	119210
	323110	249970	304880	1799680	1255500	1560930	887050	1421590	678220	2356290	1472450	2653030
	412350	525210	524350	2911160	2496310	1624240	759420	1586070	1866540	2112370	2210950	2682950
	317970	680220	868690	1298940	1891050	1184440	863200	1340020	2223260	2188950	2004870	1763220
	261470	290440	709140	886420	772600	511510	1012440	901160	1865690	1417880	1748210	1599780
	86880	235280	216010	362900	267890	294160	187720	286450	401720	568660	501480	1167740
	64750	104080	74460	199570	200190	151060	85820	79500	124710	210070	168730	201960
	26230	45930	41380	42050	30070	29760	436590	376290	666060	760	590	520
	2D
	186810	73140	92500	65580	54960	71920	45440	67060	74400	83110	46330	47550
	1400910	1462150	1392030	2138310	2049660	1508800	2005690	2574910	3855840	2839810	1978670	963870
	1273230	924580	905330	1905430	896600	418220	1641190	2265630	2445910	2015450	2853720	2449510
	1158420	1701970	1224470	2380920	1086940	955900	1962900	1594930	3081670	3709390	2620680	2443160
	1382690	972800	551080	1486750	1121640	769030	1920480	2250280	2383830	2170220	1967440	3159440
	939660	934360	474110	687770	778570	398620	1683360	1530480	1329870	1588350	1873280	2143870
	294700	557920	224690	191030	198760	91000	781320	459590	1626570	807470	538670	532520
	530	780	620	510	580	490	550	650	720	700	550	560
	3A
	112710	24250	16880	21910	106510	81820	198500	73750	91200	28610	58040	88670
	1531930	295580	397220	180890	1412910	962400	936930	1229290	481600	314940	739420	1765610
	1326390	190080	233600	89560	906660	1279670	321550	985330	263470	539610	404110	1952060
	460850	97280	229550	70530	137260	327390	143170	242730	249550	449480	172330	2250500
	81690	35050	39480	77590	50890	36000	87770	42080	34930	33990	70960	169480
	99110	27690	24940	26280	65620	29310	130050	73450	82380	103210	40610	182110
	108500	42340	28690	34310	65630	88880	48050	34830	108190	34590	31840	107410
	26700	22700	22110	23440	11660	21280	61760	62890	73810	720	650	1510
	3B
	219990	129000	162760	83330	60910	89470	77020	110120	108170	72030	54120	92080
	2798670	1637730	2640940	2571750	2773020	3607210	850970	1874960	1621470	2561910	1876860	2629770
	1369680	1643070	1717350	3800890	3280900	2370290	1186350	2262930	1767270	4146020	2447100	1194030
	1864360	1293040	1745020	2987500	2987170	1927190	634870	1117500	1826890	3456940	4114780	4802080
	725470	483650	650530	621680	1050350	668860	478590	1782750	1765320	1359900	1682260	2630470
	686780	489840	776120	1282360	833250	785870	745970	1367030	1195090	2764420	2765580	3127960
	136000	94280	153350	72160	86040	91370	90440	38690	104240	100560	88830	99670
	470	500	500	470	420	460	430	460	470	540	410	460
	3C
	90670	106830	66280	198680	154720	153830	140330	147260	63910	91280	33150	88270
	1759270	1374260	1759770	1779950	1366520	735270	1987600	494830	313200	719180	488730	1674350
	635020	459240	1568960	1468210	1099870	323420	683710	244390	407770	421940	541050	1918450
	1289700	652850	601960	1514740	339540	327880	908660	295480	947220	790290	954560	3392720
	1337290	338600	724070	1592320	571080	163490	580990	224030	264980	681610	762570	1974280
	180850	96000	119270	255320	237740	94980	167130	85850	39680	173010	158600	428050
	77660	51200	47160	138190	82540	37190	26980	33600	34510	82180	32690	112480
	38150	73170	36490	21490	29090	14420	64350	67770	54370	460	440	680
	3D
	156830	140090	148110	46840	66510	38920	125220	67980	49150	88200	30370	110550
	1787640	1664930	1599940	730770	1873190	1078000	1286360	1779160	688620	1466300	1069640	2527240
	2244370	775010	1884490	647110	1078400	510040	1228330	988510	826550	2792190	1036690	2504410
	1998820	880130	1661730	1016690	2159370	1524390	1164580	835520	1271480	3440270	2410410	4313150
	2084690	800320	1154450	674450	1492850	624020	1410000	1173170	635430	3406180	3847410	3291490
	944200	580870	946010	408270	763180	265820	876000	2217020	785890	3042340	1859080	3392050
	241880	115620	165600	70120	205250	147290	275870	462120	177820	759620	625820	764570
	450	540	520	430	480	430	530	500	490	610	690	580
	4A
	119950	209420	119590	70120	137990	116750	205160	146170	149340	164560	79460	98360
	1900220	1145900	917020	1847260	1575370	771260	695140	1444170	1125100	1291060	1443080	1690140
	1099780	651200	980550	1470500	1430490	1100660	918650	1240470	708960	1115990	1191530	2164340
	990200	943230	804350	694210	736350	427120	450790	658030	720710	583680	1373870	1951700
	189070	69200	166270	164050	231910	108480	129080	92280	151890	272320	279720	391150
	132510	64830	60950	86720	80480	48360	65410	73800	76880	89870	83500	128440
	98480	94430	70250	135230	101960	43420	76530	84530	76500	79230	72810	93300
	30040	53230	66960	38050	61850	72620	523260	879470	715910	560	580	530
	4B
	255210	128760	347160	104250	114380	98810	115330	131690	160540	88200	112480	75350
	1388550	1241780	1284020	3044520	2754400	2553270	2128220	1997070	2192540	3047320	2936960	2916670
	1154830	1036410	1571040	2205330	1925230	2878040	2054370	1938610	2217480	2919870	3509210	3352310
	1099520	1161520	1060300	2057600	2200650	2412050	1463700	2126490	1668200	2208110	2553970	3044190
	691170	573040	640450	1332860	1049750	1166800	1076750	1379120	1110590	2099670	1530000	2049380
	159640	196320	116300	470170	430100	486650	448550	671990	385850	695190	1250840	982300
	93180	150680	163090	136620	116630	130470	132430	145440	126030	149130	165170	134480
	410	480	450	450	390	430	460	450	460	400	430	420
	4C
	102260	117180	204400	157100	169550	134030	165090	410840	186420	139280	213660	178010
	104590	983610	2392590	2126140	2794040	1825510	2186060	3086690	2150740	1509270	2297860	2536750
	1101860	1848080	1206100	1666820	2044560	1954640	2465850	1872600	2178500	2088590	2796100	3664320
	1542240	1663430	1626580	1394610	2215680	1704350	2169100	2707810	2206930	2175400	2164220	3957270
	1116300	1281420	1535900	1169470	1732630	1860530	1605970	1006470	1204600	2115730	2607130	3209670
	384480	263350	277290	217600	271770	351950	571270	819650	600090	725650	988140	1435510
	137660	154900	107810	202480	168110	156330	198150	178490	391040	123120	150360	238700
	61830	66010	51280	71400	47390	35780	967130	868330	677080	680	880	890
	4D
	119870	114440	224130	122920	129580	100300	91960	125310	294650	97590	107550	138040
	1376180	1568850	1621990	2006250	2260050	2105450	2591410	1707640	1560640	2178850	2997810	2553040
	1532720	662970	1141940	2268060	2255640	2164270	2258110	1853240	2035250	2427880	3091330	3117670
	1561790	919720	1376890	2358620	2184310	2808490	2364610	1924200	1828370	2642870	3163190	3479950
	1324550	1279730	1374690	2244790	2366040	1608020	1875030	2122680	1940110	2255640	3267750	3253340
	1090890	1025150	930330	1361370	1488710	997640	1172920	1529430	1130530	1950820	3610680	2068520
	342280	349770	415780	431670	343150	378120	814410	688900	721120	938140	924980	1297870
	530	550	620	620	570	510	720	630	610	690	690	590
	5A
	154650	62540	97400	57510	88100	57690	92950	63640	158350	114980	115390	117290
	834660	674580	534470	453960	402730	315330	1446760	1912000	2267850	2364270	1911400	3210280
	1157570	571360	839050	813140	489130	1412800	1524890	1691720	1227450	1580200	1453900	1869050
	140640	366860	473660	156450	93400	118130	787500	176150	496680	1238110	1058410	1024990
	78090	85740	61790	40010	30420	32110	368230	219460	142530	405760	317430	780120
	30130	58640	54900	29080	24420	70240	111360	187080	48820	143550	158290	161210
	39370	57360	88220	46690	21790	25740	89490	111610	55430	88590	172000	182650
	35860	39830	48760	23500	13830	24320	287080	368940	339410	540	420	410
	5B
	148390	170990	106050	146660	78390	124450	126760	330880	112290	91340	80460	110090
	2044040	1690180	1853810	2725680	1905860	3256080	2802300	3132870	2868570	1805790	3361170	2612550
	2300390	1816960	1580470	3220590	2149190	3172730	2904590	1768040	3058900	1434270	3628000	3582110
	1094870	2082810	2054570	2079970	2381890	2465330	2583500	2578770	2260560	1312500	3296160	2347670
	1006770	1128500	989370	1017420	1548590	1755760	2177710	2457820	1605290	648640	1996220	2506880
	350270	382850	335800	354760	389560	461510	687480	533050	715980	668040	915560	997360
	153380	160210	145430	116870	77520	128120	90880	188050	108710	103670	143060	160040
	500	500	420	500	450	540	480	520	490	440	450	470
	5C
	49970	61540	86540	143840	229740	211880	163090	122060	78490	126620	123780	88380
	1085490	1045820	1111170	1622530	1019530	1781930	802800	1146840	1802830	2299480	1751390	1186560
	320720	263700	634290	1596480	2039730	1708760	897590	1516770	1673700	2650640	2315050	1705200
	655470	692100	352250	1149560	658450	886390	646690	668070	395420	2103110	2585260	2817770
	414470	419920	490430	684840	1004540	1145190	518980	437860	926350	2347410	2043080	1302130
	71530	151640	129250	230520	218260	223910	236500	238040	396990	1105580	854010	870920
	44370	54740	69550	117980	115930	91460	155010	85480	380460	179510	208880	225650
	14740	16430	19810	13270	15850	11090	334020	419450	345470	630	620	530
	5D
	131800	104200	97700	68500	98020	110330	248090	97890	75320	66460	52310	83730
	1228450	1404580	1011050	1429090	1115360	2307770	1684410	1758080	1816260	1949980	1268330	1384150
	572250	795920	723040	2298630	1720950	2683310	1661090	3213240	1638030	2157910	1146410	1470330
	1129530	975260	1052530	2318040	2126110	2231820	2108160	2455880	2710760	1184800	2513930	1790280
	1770420	1110430	403530	1559380	1941070	3459720	2562680	2725480	1787150	2125750	2685830	2403510
	797690	976720	601620	1218260	1622780	2056490	1957120	1686790	1784330	2051150	2111950	1180560
	214250	214710	307990	214690	217280	224910	514230	667470	664450	756180	1069070	512990
	470	520	530	450	540	520	480	620	570	580	680	830
Assay 6,7
													6A/7A/8A/9A: alphaMSH
													6B/7B/8B/9B: Setmelanotide
	6A
	124010	163700	161220	162160	79950	72470	92340	105950	111880	89120	83370	57210
	1731900	1752830	1600520	94150	56870	72040	9280	6030	375360	82220	163130	7530
	1573180	1749410	1674330	39690	49260	70310	317730	493040	270540	84830	63890	96730
	1132820	1420710	1135130	42080	77040	64990	311520	413770	263220	95520	97500	93610
	219680	181900	285060	42470	73280	70000	111550	126130	212180	74140	124460	76660
	65030	56190	95500	52350	95380	80410	94030	101560	83760	94520	128360	63130
	101880	90350	124320	63300	58480	72740	56520	110870	99830	76680	86400	52700
	29860	34600	24170	510	620	610	375650	305130	248340	550	590	450
	6B
	50000	54220	91080	57520	115170	68620	91550	98410	129840	66840	81810	80770
	1029220	1489170	1449300	79760	56960	33970	217580	376650	286740	54310	56150	39310
	1420300	1475660	1733640	60470	101360	60290	309700	274080	330860	42210	133350	82640
	996140	1357930	1728830	51810	81120	66310	379820	280990	384670	77710	86680	65320
	976170	1337940	1169040	42260	54100	72430	307880	244880	237470	57380	85420	79400
	342100	253010	292610	50170	56390	63680	171130	163710	225660	120820	81540	64600
	95170	72940	70020	98800	62450	56210	146290	113680	156230	95480	77000	58260
	68930	84440	49610	55650	129080	137990	103250	154750	111130	79210	96280	77970
	7A
	67960	91760	45120	197410	108090	123630	299570	297830	157770	97910	147580	34870
	881480	793580	980290	72170	105350	220150	271900	373730	407630	35170	43160	107400
	602880	405700	970010	89600	83830	91790	366770	580770	713990	63170	67510	84400
	602720	536080	697420	97530	62520	98050	288770	355490	383690	139740	74940	70070
	101680	108140	81630	135810	51600	110750	280450	162650	105230	110760	76820	96380
	44550	75550	50340	80160	93480	109610	232940	164960	197390	116220	117800	79840
	54090	28010	58990	91010	121470	74130	87910	137720	170120	70280	54440	84870
	34940	32550	41150	33880	45510	1700	505430	526680	386360	10300	11970	11060
	7B
	103440	89440	88500	103850	196080	109790	384210	120690	158970	67330	130980	94390
	804770	1215200	840540	57150	92740	42490	338590	380820	351640	54940	41380	42330
	409980	1775360	1515130	66510	104490	61620	346680	341200	429940	78470	109680	95780
	1115130	1189610	1417040	140960	94840	121640	583410	250130	157790	79280	149610	146170
	995460	1039010	588770	147450	85100	94740	336550	364400	318640	124510	40940	113700
	310740	577060	176190	79630	76390	71320	194990	178010	351990	81940	69490	108520
	93020	97590	82740	84790	60280	90310	322840	186130	115590	61960	75160	121210
	110470	72660	171280	67020	95240	96680	120310	134380	62030	81210	71200	51280
	8A
	56100	127130	96450	70340	55850	140240	273740	115640	225000	67240	47530	188730
	1607170	2067000	1878330	126420	72510	72400	494810	665580	419500	63650	75770	47620
	1499230	1902590	1935740	99080	124760	79720	455890	637910	388680	78110	51780	78470
	830370	980980	1300720	57730	85170	47200	412950	440770	466840	47480	73850	76250
	175150	248720	207250	71390	55460	73650	168190	255730	163240	52700	45160	45870
	156830	100410	141120	51710	119960	64120	241500	112150	160230	52220	79100	70850
	56500	102510	105430	77700	74030	77350	94910	164210	140380	154040	70780	47330
	29250	23020	35060	36210	2300	940	831550	11570	8390	610	490	600
	8B
	120970	90330	200990	98950	113880	139510	77270	84110	221450	32510	51210	23680
	1319940	2212310	1870900	74390	43570	109200	432100	359670	425920	36060	52570	32070
	1212380	1249600	1559490	68880	68400	87660	411910	521870	572540	76900	52540	55910
	1247640	1768860	1517720	73030	135580	98200	382050	525590	535300	81310	44590	35360
	1325520	1166520	1002570	40460	44070	56010	388390	426720	497130	61780	32280	55490
	595640	649550	456660	54330	171440	95200	300550	265550	370190	50280	73250	45670
	135760	128720	118560	87020	39770	40830	93660	124360	119370	58030	91660	56330
	78100	178820	68750	41010	45330	59160	89970	91680	126630	46460	48620	89350
	9A
	187100	142600	147780	49350	73780	62770	151050	185270	146890	107010	139810	43800
	2752670	2440010	2852480	47560	42350	45260	784130	446780	484560	103710	90130	81330
	2191700	2427410	2253220	78360	52710	102830	605660	488990	562300	60510	75760	87850
	1691990	1783900	1773830	65590	74830	64130	444560	384610	269800	105430	216650	66130
	345750	387190	270690	55550	113970	67890	209390	104760	168760	98940	120390	48890
	119250	169230	140300	58100	50690	54490	198410	108440	148050	73950	80230	51340
	78920	167160	133330	169070	108540	105700	69180	178250	129430	84360	216110	37970
	27310	40390	37640	47060	43970	2750	732450	41340	49540	650	690	560
	9B
	132050	165090	124360	51260	65580	109650	115720	107560	138140	61730	71670	40500
	1939480	2199250	2209030	99920	61920	68800	335790	539860	400310	51160	64460	40760
	1788350	2595470	2314000	63500	41910	45020	457210	615070	597490	56530	57110	57970
	2669740	2017450	2704210	116590	47920	42450	459840	680730	550090	97350	85140	72480
	1768420	1632620	2779560	42980	78000	35050	716330	474690	448740	110420	107630	78780
	514030	903480	984790	64590	34410	37360	169360	494450	311680	86180	104850	92680
	145280	178380	169500	88550	41620	39920	123800	361530	137940	72520	118410	138390
	161420	187090	196200	41920	73340	89090	97200	288030	213720	62820	63930	44180
Assay 10,11,12
								10A/11A/12A: Setmelanotide
	10A
	112390	303060	398240	192670	274470	248890	199840	288830	316280	159180	234530	179500
	2100820	2405990	2672870	1946560	3832460	1787050	3061960	2742490	2973290	4846950	4359070	3238940
	2363010	2705180	1614100	3475690	3180780	3137320	3892280	3412280	2901350	6706750	6950110	5816470
	2877460	2652340	2976830	2561580	3255880	4326920	3896700	4833360	3734430	6598920	5620080	7289600
	1949740	2285390	2372840	2506020	3450250	2402410	4119870	3466620	4455890	6453640	5353860	6827010
	436410	450400	587250	626910	758480	568100	2644330	2442650	2361580	4664610	4117410	3983880
	173200	224980	330050	245560	348130	429410	649550	831850	602460	1402700	1074230	1057480
	144500	82650	91680	72880	85260	3300	272300	268310	309870	222040	256460	477990
	11A
	102440	63030	80860	73970	77160	65430	67530	89660	110840	59010	65220	118050
	424300	215840	170200	206490	238100	240380	321520	521520	556900	872680	644350	933090
	638280	380620	164570	294680	230870	233490	403740	410310	456780	880020	915830	1080960
	409480	176730	208360	260480	231860	166080	578520	368250	324090	1061400	997210	1762270
	270010	152810	196880	119560	174450	232770	294060	304780	577980	806400	1286770	971020
	116370	86100	126490	79290	115920	107810	229320	209180	310560	496710	763070	1035840
	61780	70010	76350	76280	117130	92880	118340	84580	91180	245070	390760	388710
	49640	45380	39970	35600	60160	1650	66350	77570	86250	112470	130500	136800
	12A
	77030	72560	110130	68550	124510	94660	92770	80220	90280	78450	87530	68820
	314440	391530	213880	462100	320170	353970	800650	810660	739230	864240	1024980	753360
	513810	347300	363780	405560	432240	285400	672000	623760	701870	704210	975180	1360760
	561560	397810	415440	357060	299180	353180	710170	613820	892910	831240	775310	1172840
	478470	245060	278850	237680	143250	205030	646820	713810	1021250	962860	882630	886680
	110950	97960	104680	73020	178240	125950	422850	521130	617930	853110	599880	770270
	71860	67150	67590	90800	89040	149790	136290	304300	107090	197050	309890	703020
	47240	58110	53550	66400	66120	2770	63910	122860	97290	85810	109020	89010
		ohne PTX
									13A/14A/15A/16A/17A/18A/19A/20A
												blau/rosa(alphaMSH)
												grün/gelb(Setmelanotide)
		mit PTX
									1B/2B/3B/4B/5B
		13A
			Firefly
			Trafo-MEM ohne PTX						Trafo-MEM ohne PTX							fold over WT basal	Trafo-MEM ohne PTX						Trafo-MEM ohne PTX							fold over WT 1 µM a-MSH [%]	Trafo-MEM ohne PTX						Trafo-MEM ohne PTX
			WT			Chim 7			WT			Chim 7					WT			Chim 7			WT			Chim 7					WT			Chim 7			WT			Chim 7
		basal	129320	91360	161660	47500	49400	59660	142280	107990	137660	72000	56840	40670		basal	1.0147	0.716849	1.26845	0.372705	0.387613	0.468117	1.1003	0.835125	1.06457	0.556801	0.439564	0.314516		basal	8.54093	6.03387	10.6768	3.13714	3.26262	3.94024	6.90447	5.24047	6.68028	3.49397	2.75829	1.97361
		-5	2495510	1903620	3001440	2677630	2423060	1951470	2236540	2357660	1433740	1727690	2069250	2056800		-5	19.5808	14.9366	23.5506	21.0098	19.0123	15.3121	17.296	18.2326	11.0876	13.3608	16.0022	15.906		-5	164.816	125.725	198.23	176.844	160.031	128.885	108.533	114.411	69.5756	83.8402	100.415	99.8111
		-6	1711940	1334100	1496320	2316580	2318700	2223130	1992030	2213860	1976190	1899660	2338300	2717690		-6	13.4326	10.4679	11.7408	18.1769	18.1935	17.4436	15.4051	17.1206	15.2826	14.6907	18.0829	21.0169		-6	113.065	88.1106	98.8244	152.998	153.138	146.827	96.6679	107.433	95.8993	92.1855	113.472	131.882
		-7	1354690	986060	1142590	2655820	2176120	1216570	1404700	1720450	1922900	2283330	3367620	3464910		-7	10.6295	7.73704	8.96524	20.8387	17.0748	9.54572	10.863	13.3048	14.8705	17.6578	26.043	26.7954		-7	89.4705	65.1243	75.4623	175.404	143.722	80.3483	68.1664	83.4889	93.3133	110.804	163.422	168.143
		-8	273410	215550	186100	1212380	1195460	936640	1334280	1197420	1150340	1787190	2542870	2469540		-8	2.14529	1.6913	1.46022	9.51284	9.38008	7.34927	10.3185	9.26007	8.89599	13.821	19.6649	19.0978		-8	18.0574	14.236	12.291	80.0716	78.9541	61.8604	64.7491	58.1076	55.823	86.7276	123.399	119.84
		-9	87240	78990	77060	354380	459930	493760	302330	265120	246580	1242860	1234480	1599380		-9	0.684522	0.619789	0.604645	2.78061	3.6088	3.87425	2.33802	2.05027	1.90689	9.61148	9.54667	12.3686		-9	5.76176	5.21689	5.08942	23.405	30.3761	32.6104	14.6713	12.8656	11.9659	60.3127	59.9061	77.6137
		-10	126020	82150	116810	63580	70440	61810	83150	58010	68090	312710	402450	407680		-10	0.988806	0.644583	0.91654	0.498875	0.552702	0.484987	0.643028	0.448612	0.526564	2.4183	3.11229	3.15273		-10	8.32299	5.42559	7.71471	4.19914	4.65221	4.08224	4.03505	2.81507	3.30423	15.175	19.5298	19.7836
			36650	54260	37150	36550	55630	2630	633760	794710	585390						0.287571	0.425747	0.291494	0.286787	0.436496	0.0206361	4.90109	6.14577	4.52703	0	0	0			2.42055	3.5836	2.45357	2.41394	3.67408	0.173698	30.7547	38.5652	28.4074	0	0	0
			pcDps basal			pcDps 10-5
		13B
			Trafo-MEM mit PTX						Trafo-MEM mit PTX							fold over WT basal	Trafo-MEM mit PTX						Trafo-MEM mit PTX							fold over WT 1 µM a-MSH [%]	Trafo-MEM mit PTX						Trafo-MEM mit PTX
			WT			Chim 7			WT			Chim 7					WT			Chim 7			WT			Chim 7					WT			Chim 7			WT			Chim 7
		basal	101910	128960	105070	43360	46540	67210	164360	115740	136910	47040	60960	49970		basal	1.64816	1.25725	1.9823	1.76844	1.60031	1.28885	1.08533	1.14411	0.695756	0.838402	1.00415	0.998111		basal	6.73064	8.51716	6.93934	2.86371	3.07373	4.43888	7.97596	5.61656	6.64388	2.28273	2.95823	2.42491
		-5	1115260	1016050	1228750	948730	957290	1046370	1220430	692130	1125760	729020	629770	810990		-5	1.13065	0.881106	0.988244	1.52998	1.53138	1.46827	0.966679	1.07433	0.958993	0.921855	1.13472	1.31882		-5	73.6573	67.105	81.1527	62.6588	63.2242	69.1075	59.2242	33.5872	54.6302	35.3774	30.5611	39.3552
		-6	998400	1252860	1001880	1023460	837460	1248560	1145400	745690	714170	925560	804530	1002220		-6	0.894705	0.651243	0.754623	1.75404	1.43722	0.803483	0.681664	0.834889	0.933133	1.10804	1.63422	1.68143		-6	65.9393	82.7451	66.1691	67.5944	55.31	82.4611	55.5832	36.1864	34.6568	44.915	39.0417	48.6351
		-7	686860	987820	609110	707140	743670	1009280	767160	867280	1248320	828310	953540	948620		-7	0.180574	0.14236	0.12291	0.800716	0.789541	0.618604	0.647491	0.581076	0.55823	0.867276	1.23399	1.1984		-7	45.3636	65.2405	40.2286	46.703	49.1157	66.6579	37.2282	42.0868	60.5777	40.1957	46.2728	46.034
		-8	233590	254480	179740	694170	599140	828670	746680	634630	1093200	798750	820530	1176850		-8	0.0576176	0.0521689	0.0508942	0.23405	0.303761	0.326104	0.146713	0.128656	0.119659	0.603127	0.599061	0.776137		-8	15.4274	16.8071	11.8709	45.8464	39.5702	54.7295	36.2344	30.7969	53.0501	38.7612	39.8182	57.1094
		-9	82090	91420	84260	195380	348650	496230	192130	185810	233640	798280	526970	557820		-9	0.0832299	0.0542559	0.0771471	0.0419914	0.0465221	0.0408224	0.0403505	0.0281507	0.0330423	0.15175	0.195298	0.197836		-9	5.42163	6.03783	5.56495	12.9039	23.0266	32.7735	9.32356	9.01687	11.3379	38.7384	25.5725	27.0695
		-10	95220	116560	119230	68510	59640	101280	111090	101190	108900	356600	225430	428070		-10	0.0242055	0.035836	0.0245357	0.0241394	0.0367408	0.00173698	0.307547	0.385652	0.284074	0	0	0		-10	6.2888	7.6982	7.87454	4.52474	3.93892	6.68903	5.3909	4.91048	5.28463	17.3049	10.9395	20.7731
		-11	610	470	1250	2920	5990	2540	132310	195740	116300	65900	70320	74270																	0.0402874	0.0310411	0.0825562	0.192851	0.395609	0.167754	6.42065	9.49874	5.64373	3.19795	3.41244	3.60413
		14A
			Trafo-MEM ohne PTX						Trafo-MEM ohne PTX							fold over WT basal	Trafo-MEM ohne PTX						Trafo-MEM ohne PTX							fold over WT 1 µM a-MSH [%]	Trafo-MEM ohne PTX						Trafo-MEM ohne PTX
			WT			Chim 7			WT			Chim 7					WT			Chim 7			WT			Chim 7					WT			Chim 7			WT			Chim 7
		basal	21930	31380	15730	13510	11010	20630	19480	18270	21660	18110	18130	16420		basal	0.952926	1.36356	0.683517	0.587051	0.478418	0.896437	0.983673	0.922572	1.09376	0.914493	0.915502	0.829153		basal	16.2814	23.2974	11.6784	10.0302	8.17412	15.3163	15.5898	14.6215	17.3345	14.4934	14.5094	13.1409
		-5	187520	133040	202150	261000	283400	357390	107220	105620	86060	219820	487100	295500		-5	8.14832	5.781	8.78404	11.3413	12.3146	15.5297	5.41424	5.33345	4.34573	11.1002	24.5969	14.9217		-5	139.22	98.7725	150.082	193.774	210.404	265.336	85.808	84.5276	68.8737	175.922	389.826	236.488
		-6	138520	197360	68200	238780	250020	355680	151140	97430	126290	296260	401370	357130		-6	6.01912	8.5759	2.9635	10.3757	10.8641	15.4554	7.63205	4.91988	6.37721	14.9601	20.2678	18.0338		-6	102.841	146.525	50.6335	177.277	185.622	264.067	120.957	77.9731	101.07	237.097	321.216	285.811
		-7	87560	91520	121730	204160	224980	226940	134090	91050	169950	344450	312030	346130		-7	3.80475	3.97683	5.28954	8.87138	9.77607	9.86124	6.77108	4.59771	8.58189	17.3935	15.7564	17.4784		-7	65.0069	67.9469	90.3757	151.574	167.031	168.486	107.312	72.8672	136.011	275.663	249.717	277.007
		-8	33810	35550	43340	171280	176810	207750	155730	142060	149080	417480	518070	575300		-8	1.46915	1.54476	1.88326	7.44264	7.68294	9.02738	7.86383	7.17354	7.52803	21.0813	26.1607	29.0507		-8	25.1015	26.3933	32.1768	127.163	131.269	154.239	124.631	113.69	119.309	334.109	414.611	460.412
		-9	25480	29540	30210	143650	54070	45340	87980	63530	75640	452920	449140	454530		-9	1.10718	1.2836	1.31272	6.24203	2.34951	1.97016	4.44269	3.20805	3.81956	22.8709	22.68	22.9522		-9	18.917	21.9313	22.4287	106.65	40.143	33.6617	70.4103	50.843	60.5346	362.471	359.446	363.76
		-10	24060	35640	26550	14010	23700	41720	42590	45780	64920	214720	284190	149780		-10	1.04548	1.54867	1.15368	0.608778	1.02984	1.81286	2.15065	2.31173	3.27824	10.8426	14.3506	7.56337		-10	17.8628	26.4601	19.7114	10.4014	17.5955	30.9741	34.0847	36.6377	51.9554	171.84	227.437	119.869
		-11	31960	43780	31550	9480	20030	33630	57220	40960	66790	80410	39860	33240			1.38876	1.90238	1.37094	0.411935	0.870365	1.46133	2.88941	2.06834	3.37266	4.06043	2.01279	1.67851			23.728	32.5035	23.4236	7.03821	14.8708	24.9678	45.7931	32.7802	53.452	64.352	31.8999	26.6019
		14B
			Trafo-MEM mit PTX						Trafo-MEM mit PTX							fold over WT basal	Trafo-MEM mit PTX						Trafo-MEM mit PTX							fold over WT 1 µM a-MSH [%]	Trafo-MEM mit PTX						Trafo-MEM mit PTX
			WT			Chim 7			WT			Chim 7					WT			Chim 7			WT			Chim 7					WT			Chim 7			WT			Chim 7
		basal	40660	15910	22310	27710	27910	25820	28140	16050	16350	15860	16790	23960		basal	1.7668	0.691338	0.969438	1.20408	1.21278	1.12196	1.42097	0.697422	0.710458	0.689166	0.729577	1.04114		basal	30.1871	11.812	16.5636	20.5727	20.7211	19.1695	22.5204	11.916	12.1387	11.7749	12.4654	17.7886
		-5	202670	239740	103260	276220	296680	275740	45610	64000	51960	90420	157500	129910		-5	8.80663	10.4174	4.48696	12.0026	12.8917	11.9817	1.98189	2.781	2.25782	3.92903	6.84386	5.64499		-5	150.468	177.99	76.663	205.073	220.263	204.717	33.8621	47.5153	38.5765	67.1303	116.932	96.4487
		-6	309520	149630	85210	222250	250790	186450	77810	73020	51120	105080	112880	173840		-6	13.4496	6.50188	3.70264	9.65744	10.8976	8.10183	3.38108	3.17294	2.22132	4.56605	4.90498	7.55388		-6	229.796	111.089	63.2622	165.004	186.193	138.426	57.7683	54.212	37.9529	78.0143	83.8052	129.064
		-7	275560	152410	76300	313550	255180	221610	65150	56590	60830	131540	155460	201740		-7	11.9739	6.62268	3.31547	13.6247	11.0884	9.62963	2.83097	2.45901	2.64325	5.71582	6.75521	8.76622		-7	204.583	113.153	56.6472	232.788	189.453	164.529	48.3691	42.014	45.1618	97.6589	115.418	149.777
		-8	87340	94710	33630	351240	275570	200270	63710	57310	56160	215830	200150	220780		-8	3.79519	4.11544	1.46133	15.2625	11.9744	8.70235	2.7684	2.4903	2.44032	9.37848	8.69713	9.59357		-8	64.8436	70.3153	24.9678	260.77	204.591	148.686	47.3	42.5485	41.6947	160.238	148.597	163.913
		-9	59490	33370	37110	127330	141220	108920	48610	34790	49700	213520	240320	218310		-9	2.58502	1.45003	1.61254	5.53288	6.13644	4.73291	2.11225	1.51173	2.15962	9.2781	10.4426	9.48624		-9	44.167	24.7748	27.5515	94.5333	104.846	80.8652	36.0894	25.829	36.8986	158.523	178.42	162.079
		-10	61230	27960	92590	43970	35030	35470	37680	31750	55240	151550	209540	195090		-10	2.66063	1.21495	4.02332	1.91063	1.52216	1.54128	1.63731	1.37963	2.40035	6.58531	9.10516	8.47726		-10	45.4588	20.7583	68.7413	32.6445	26.0072	26.3339	27.9747	23.5721	41.0117	112.515	155.568	144.84
		-11	49990	21970	37450	42300	31760	35580	48870	59920	47540	56180	78850	106320			2.17222	0.954664	1.62732	1.83806	1.38007	1.54606	2.12355	2.60371	2.06576	2.44119	3.42627	4.61993			37.1139	16.3111	27.8039	31.4047	23.5795	26.4156	36.2824	44.4862	35.295	41.7096	58.5404	78.9349
		15A
			Trafo-MEM ohne PTX						Trafo-MEM ohne PTX							fold over WT basal	Trafo-MEM ohne PTX						Trafo-MEM ohne PTX							fold over WT 1 µM a-MSH [%]	Trafo-MEM ohne PTX						Trafo-MEM ohne PTX
			WT			Chim 7			WT			Chim 7					WT			Chim 7			WT			Chim 7					WT			Chim 7			WT			Chim 7
		basal	98920	106160	69670	81520	64000	51310	56730	104830	138740	48970	44670	110530		basal	1.08011	1.15916	0.760728	0.890118	0.698817	0.560255	0.566733	1.04725	1.38601	0.489211	0.446254	1.1042		basal	35.9461	38.577	25.3171	29.6232	23.2567	18.6453	8.49794	15.7031	20.7827	7.33552	6.6914	16.557
		-5	1361710	666190	712330	1266850	977690	1209050	614010	712080	487390	1046890	994800	876030		-5	14.8685	7.27414	7.77794	13.8328	10.6754	13.2016	6.13397	7.11369	4.86903	10.4584	9.93806	8.75155		-5	494.825	242.084	258.85	460.355	355.278	439.351	91.9764	106.667	73.0092	156.82	149.017	131.226
		-6	407190	146470	271910	1219790	1079410	1131270	819390	649510	533820	933790	1004180	1052390		-6	4.44611	1.59931	2.96899	13.3189	11.7861	12.3524	8.18571	6.48861	5.33287	9.32857	10.0318	10.5134		-6	147.967	53.225	98.8081	443.254	392.242	411.087	122.742	97.2942	79.9642	139.878	150.422	157.644
		-7	80510	126780	49880	670250	469540	643420	835870	793210	736100	1073090	1191570	1194620		-7	0.87909	1.38431	0.544641	7.31847	5.12692	7.02551	8.35035	7.92418	7.35365	10.7202	11.9038	11.9343		-7	29.2562	46.07	18.1257	243.559	170.624	233.809	125.21	118.82	110.265	160.745	178.493	178.95
		-8	146670	61340	137850	125220	89670	131140	814440	539870	598700	1456320	1632620	1693740		-8	1.60149	0.669773	1.50519	1.36728	0.979108	1.43192	8.13626	5.39331	5.98102	14.5487	16.3099	16.9205		-8	53.2977	22.2901	50.0927	45.5031	32.5848	47.6543	122	80.8705	89.683	218.151	244.56	253.716
		-9	88220	147320	179450	38630	42220	115030	265860	290810	187570	1493600	954290	1373810		-9	0.963276	1.60859	1.95942	0.421802	0.461001	1.25601	2.65594	2.90519	1.87383	14.9211	9.53337	13.7244		-9	32.0579	53.5339	65.2095	14.0376	15.3421	41.8002	39.8248	43.5623	28.0973	223.736	142.949	205.792
		-10	32890	95470	88340	30740	34200	53140	47680	179000	89110	518840	407810	459810		-10	0.359126	1.04244	0.964586	0.335651	0.37343	0.580237	0.476324	1.78821	0.89021	5.18322	4.07403	4.59351		-10	11.9517	34.6924	32.1015	11.1705	12.4278	19.3103	7.14229	26.8135	13.3483	77.7203	61.0884	68.8778
		-11	12820	67620	36650	11720	33060	63920	31690	76100	148010	91050	92430	111620			0.139982	0.738344	0.400182	0.127971	0.360983	0.697944	0.316583	0.76024	1.47862	0.90959	0.923377	1.11508			4.6586	24.5721	13.3181	4.25888	12.0135	23.2276	4.74704	11.3995	22.1713	13.639	13.8457	16.7203
		15B
			Trafo-MEM mit PTX						Trafo-MEM mit PTX							fold over WT basal	Trafo-MEM mit PTX						Trafo-MEM mit PTX							fold over WT 1 µM a-MSH [%]	Trafo-MEM mit PTX						Trafo-MEM mit PTX
			WT			Chim 7			WT			Chim 7					WT			Chim 7			WT			Chim 7					WT			Chim 7			WT			Chim 7
		basal	91290	343210	86420	62250	58250	57280	85000	89870	324030	54850	89450	53870		basal	0.996797	3.74752	0.943621	0.679709	0.636033	0.625441	0.849151	0.897802	3.23706	0.547952	0.893606	0.538162		basal	33.1734	124.717	31.4038	22.6207	21.1672	20.8147	12.7327	13.4622	48.5385	8.21633	13.3993	8.06953
		-5	607340	439480	526400	552450	622120	603100	546140	469080	446120	297900	319910	384700		-5	6.63156	4.79869	5.74777	6.03221	6.79294	6.58526	5.45594	4.68611	4.45674	2.97602	3.1959	3.84316		-5	220.698	159.701	191.286	200.752	226.069	219.158	81.8097	70.2664	66.8271	44.6243	47.9213	57.6266
		-6	347170	197190	255990	639740	522610	559940	623100	424730	423280	318430	405560	353130		-6	3.79076	2.15312	2.79516	6.98533	5.70639	6.11399	6.22478	4.24306	4.22857	3.18112	4.05155	3.52777		-6	126.156	71.6559	93.023	232.472	189.909	203.474	93.3381	63.623	63.4058	47.6996	60.7514	52.8976
		-7	95080	172270	255360	605820	606840	423030	566730	554340	524320	509510	442820	426580		-7	1.03818	1.88102	2.78828	6.61496	6.6261	4.61907	5.66164	5.53786	5.23796	5.09001	4.42378	4.26154		-7	34.5507	62.6004	92.7941	220.146	220.517	153.723	84.894	83.0381	78.5412	76.3227	66.3328	63.9001
		-8	58010	170040	141350	128900	166450	146910	490210	527890	469910	553340	469670	585270		-8	0.633412	1.85667	1.5434	1.40746	1.81747	1.60411	4.8972	5.27363	4.69441	5.52787	4.69201	5.84685		-8	21.08	61.79	51.3645	46.8404	60.4855	53.3849	73.4316	79.076	70.3908	82.8883	70.3548	87.6713
		-9	112310	81730	120830	130910	113300	57360	187240	292840	256320	514790	441190	460030		-9	1.22631	0.892411	1.31934	1.42941	1.23712	0.626315	1.87053	2.92547	2.56064	5.14276	4.40749	4.5957		-9	40.8118	29.6995	43.9078	47.5708	41.1716	20.8438	28.0479	43.8663	38.3958	77.1136	66.0886	68.9108
		-10	138420	89700	159030	90480	75880	57380	62150	153740	127440	399870	385100	246770		-10	1.51141	0.979436	1.73645	0.987953	0.828535	0.626533	0.620879	1.53586	1.27313	3.99471	3.84715	2.46523		-10	50.2998	32.5957	57.7892	32.8791	27.5737	20.851	9.30984	23.0297	19.09	59.899	57.6865	36.9652
		-11	36670	116920	93430	507040	627670	516830	56980	159800	145340	108360	160560	191260			0.4004	1.27665	1.02016	5.53638	6.85354	5.64328	0.569231	1.5964	1.45195	1.08252	1.604	1.91069			13.3253	42.487	33.9511	184.251	228.086	187.808	8.53539	23.9374	21.7714	16.2319	24.0513	28.65
		16A
			Trafo-MEM ohne PTX						Trafo-MEM ohne PTX							fold over WT basal	Trafo-MEM ohne PTX						Trafo-MEM ohne PTX							fold over WT 1 µM a-MSH [%]	Trafo-MEM ohne PTX						Trafo-MEM ohne PTX
			WT			Chim 7			WT			Chim 7					WT			Chim 7			WT			Chim 7					WT			Chim 7			WT			Chim 7
		basal	31430	30150	83720	37590	56910	30250	56570	97240	84150	83260	76250	57650		basal	0.648933	0.622505	1.72856	0.776118	1.17502	0.62457	0.713187	2.00771	1.73744	1.71906	1.57433	1.1903		basal	10.256	9.83837	27.319	12.2661	18.5705	9.871	7.83695	31.7308	27.4593	27.1689	24.8814	18.812
		-5	790400	807660	927130	1190930	1262530	1249420	442560	327820	521300	598750	886560	812110		-5	16.3193	16.6757	19.1424	24.5891	26.0674	25.7967	9.13751	6.76848	10.7632	12.3624	18.3047	16.7676		-5	257.919	263.551	302.535	388.617	411.981	407.703	144.414	106.972	170.107	195.38	289.297	265.003
		-6	352780	278000	288580	1367060	1207070	1321690	523760	667390	974360	763410	906840	1029410		-6	7.28383	5.73985	5.95829	28.2256	24.9223	27.2889	10.814	13.7796	20.1175	15.7621	18.7235	21.2542		-6	115.117	90.7153	94.1677	446.091	393.884	431.286	170.91	217.779	317.947	249.111	295.915	335.911
		-7	47170	62880	78680	713600	639430	680030	615470	625210	706790	893100	1074450	1154120		-7	0.973916	1.29828	1.6245	14.7337	13.2023	14.0405	12.7076	12.9087	14.593	18.4398	22.1841	23.829		-7	15.3922	20.5186	25.6744	232.858	208.655	221.903	200.836	204.015	230.635	291.431	350.608	376.605
		-8	35090	56670	120550	186560	110820	118090	419040	645020	681660	868660	1198270	1193530		-8	0.724501	1.17006	2.48899	3.85189	2.28809	2.4382	8.65189	13.3177	14.0742	17.9352	24.7406	24.6427		-8	11.4504	18.4922	39.3371	60.8771	36.1621	38.5344	136.739	210.479	222.435	283.456	391.012	389.465
		-9	48870	149730	97000	49910	91690	79780	89010	84880	112810	749090	987590	660640		-9	1.00902	3.09147	2.00275	1.03049	1.89312	1.64721	1.83778	1.75251	2.32918	15.4664	20.3907	13.6402		-9	15.947	48.859	31.6525	16.2863	29.9197	26.0333	29.0452	27.6975	36.8115	244.439	322.264	215.576
		-10	109470	135080	87820	45930	157910	70960	94430	137480	84580	256800	310940	215670		-10	2.26022	2.78899	1.81321	0.948314	3.26036	1.46511	1.94969	2.83854	1.74632	5.30213	6.41996	4.45292		-10	35.7216	44.0785	28.6569	14.9876	51.5282	23.1552	30.8138	44.8616	27.5996	83.7974	101.464	70.3761
		-11	36620	52050	53240	44940	51910	46560	58770	123750	97330	100750	46410	123080			0.756091	1.07467	1.09924	0.927873	1.07178	0.961321	1.21342	2.55506	2.00957	2.08018	0.958224	2.54123			11.9496	16.9846	17.373	14.6645	16.939	15.1932	19.1775	40.3814	31.7601	32.8761	15.1442	40.1627
		16B
			Trafo-MEM mit PTX						Trafo-MEM mit PTX							fold over WT basal	Trafo-MEM mit PTX						Trafo-MEM mit PTX							fold over WT 1 µM a-MSH [%]	Trafo-MEM mit PTX						Trafo-MEM mit PTX
			WT			Chim 7			WT			Chim 7					WT			Chim 7			WT			Chim 7					WT			Chim 7			WT			Chim 7
		basal	65830	53590	69690	28280	61630	55900	78930	110400	122060	45660	124490	77570		basal	1.35919	1.10647	1.43889	0.583895	1.27247	1.15416	0.995083	1.39183	1.53883	0.575643	1.56947	0.977937		basal	21.4812	17.4872	22.7408	9.22816	20.1107	18.241	10.9346	15.2943	16.9096	6.32553	17.2463	10.7462
		-5	503530	328900	485180	453620	607810	510210	286280	326330	225010	287450	254890	367650		-5	10.3964	6.79078	10.0175	9.36586	12.5494	10.5343	3.60918	4.11409	2.83674	3.62393	3.21344	4.63502		-5	164.309	107.325	158.321	148.023	198.337	166.489	39.6599	45.2083	31.1719	39.822	35.3113	50.9326
		-6	188310	152260	232600	538660	742420	584080	326730	373760	343310	409530	280480	359320		-6	3.88802	3.1437	4.80248	11.1217	15.3287	12.0595	4.11914	4.71205	4.32816	5.16301	3.53606	4.53001		-6	61.4482	49.6846	75.9006	175.772	242.262	190.593	45.2637	51.779	47.5606	56.7344	38.8564	49.7786
		-7	78140	160280	78820	410100	504590	472510	383410	424750	341370	429460	357710	409920		-7	1.61335	3.30929	1.62739	8.46731	10.4182	9.75588	4.83371	5.35489	4.30371	5.41427	4.50971	5.16793		-7	25.4982	52.3016	25.7201	133.821	164.655	154.187	53.1159	58.843	47.2919	59.4955	49.5555	56.7885
		-8	112490	44660	48730	147130	122940	132400	471940	570530	279990	711180	489840	456640		-8	2.32257	0.922092	1.00613	3.03778	2.53833	2.73365	5.94982	7.19276	3.52988	8.96596	6.17549	5.75693		-8	36.7071	14.5732	15.9013	48.0106	40.117	43.204	65.3804	79.0387	38.7886	98.5237	67.8602	63.2608
		-9	128750	46490	59980	38940	54140	274880	170710	203710	86480	515030	460510	608240		-9	2.65829	0.959876	1.2384	0.803992	1.11783	5.67543	2.15217	2.5682	1.09027	6.49307	5.80572	7.66818		-9	42.0129	15.1703	19.5723	12.7067	17.6666	89.6972	23.6494	28.2211	11.9805	71.3499	63.797	84.2628
		-10	49940	125290	91570	24770	47290	78130	191810	68190	82020	281140	295730	329760		-10	1.03111	2.58685	1.89064	0.511425	0.976394	1.61315	2.41818	0.859682	1.03404	3.54438	3.72832	4.15734		-10	16.2961	40.8839	29.8806	8.0828	15.4314	25.4949	26.5725	9.44674	11.3627	38.9479	40.9691	45.6835
		-11	108120	170380	99850	52250	48110	91680	97240	119520	67670	71690	64790	107220			2.23235	3.51783	2.0616	1.0788	0.993324	1.89291	1.22592	1.50681	0.853127	0.903807	0.816818	1.35174			35.2811	55.5974	32.5824	17.0499	15.699	29.9165	13.4712	16.5578	9.3747	9.93161	8.97571	14.8538
		17A
			Trafo-MEM ohne PTX						Trafo-MEM ohne PTX							fold over WT basal	Trafo-MEM ohne PTX						Trafo-MEM ohne PTX							fold over WT 1 µM a-MSH [%]	Trafo-MEM ohne PTX						Trafo-MEM ohne PTX
			WT			Chim 7			WT			Chim 7					WT			Chim 7			WT			Chim 7					WT			Chim 7			WT			Chim 7
		basal	288950	1134160	630170	174260	224190	270060	569910	657770	448360	231920	246180	324790		basal	0.422178	1.65709	0.920727	0.254607	0.327559	0.394578	1.0201	1.17736	0.802535	0.415121	0.440646	0.581352		basal	10.7538	42.21	23.453	6.48543	8.34367	10.0508	33.4617	38.6203	26.325	13.6169	14.4542	19.0697
		-5	1391900	2421680	3152860	3065720	2379220	4068880	2569960	1610480	2771170	2593660	4032220	3014320		-5	2.03367	3.53826	4.60657	4.47925	3.47622	5.94495	4.60006	2.88265	4.96021	4.64248	7.21741	5.39543		-5	51.8023	90.1276	117.34	114.097	88.5473	151.431	150.892	94.5576	162.706	152.284	236.747	176.983
		-6	1689150	4458620	1913070	2968950	2838890	3812450	2143010	836700	2129810	1688530	4351070	2243510		-6	2.46798	6.51439	2.79514	4.33786	4.14784	5.57028	3.83585	1.49764	3.81222	3.02236	7.78813	4.01573		-6	62.865	165.936	71.1987	110.495	105.655	141.888	125.825	49.1259	125.05	99.1402	255.468	131.725
		-7	17620	721260	478880	2645870	2565830	4411840	2419970	1607610	2200950	3419130	2238820	3788830		-7	0.0257442	1.05382	0.699681	3.86582	3.74887	6.44604	4.33159	2.87751	3.93955	6.12002	4.00734	6.78175		-7	0.655763	26.8431	17.8225	98.4713	95.4924	164.195	142.086	94.3891	129.226	200.751	131.45	222.457
		-8	39150	416180	268670	1944890	2536230	2280090	1965800	2085650	1517250	2868340	4300530	4126520		-8	0.0572012	0.608071	0.392548	2.84163	3.70563	3.33139	3.51865	3.73317	2.71578	5.13414	7.69766	7.3862		-8	1.45704	15.489	9.99908	72.3829	94.3908	84.858	115.42	122.457	89.0837	168.412	252.501	242.284
		-9	348540	263990	273440	212090	611290	685510	508150	522540	788690	2282800	1550300	2056100		-9	0.509244	0.38571	0.399517	0.30988	0.893142	1.00158	0.909555	0.935312	1.4117	4.08606	2.77493	3.68028		-9	12.9716	9.82491	10.1766	7.89335	22.7504	25.5126	29.8355	30.6804	46.3071	134.032	91.0242	120.722
		-10	265030	655530	405110	195100	335300	371560	258770	236310	348210	1571730	1566910	1481170		-10	0.387229	0.95778	0.591897	0.285056	0.489899	0.542878	0.463181	0.422979	0.623273	2.81329	2.80466	2.6512		-10	9.86361	24.3968	15.077	7.26103	12.4788	13.8283	15.1934	13.8747	20.4448	92.2824	91.9994	86.9653
		-11	412030	185680	180870	150080	118120	303730	195290	273690	497920	361420	502180	277070			0.602008	0.271293	0.264265	0.219278	0.172582	0.443773	0.349556	0.489887	0.891244	0.646918	0.898869	0.495937			15.3345	6.91045	6.73143	5.58552	4.39607	11.3039	11.4662	16.0694	29.2348	21.2204	29.485	16.2679
		17B
			Trafo-MEM mit PTX						Trafo-MEM mit PTX							fold over WT basal	Trafo-MEM mit PTX						Trafo-MEM mit PTX							fold over WT 1 µM a-MSH [%]	Trafo-MEM mit PTX						Trafo-MEM mit PTX
			WT			Chim 7			WT			Chim 7					WT			Chim 7			WT			Chim 7					WT			Chim 7			WT			Chim 7
		basal	64360	431610	558570	166890	235310	125080	268350	337130	370860	235570	128680	147500		basal	0.0940349	0.630615	0.816114	0.243839	0.343806	0.182752	0.480329	0.60344	0.663815	0.421655	0.230329	0.264015		basal	2.39528	16.0632	20.7883	6.21114	8.75752	4.6551	15.7559	19.7942	21.7746	13.8312	7.55531	8.6603
		-5	1775090	1433220	657730	546110	798850	250940	562800	676180	563780	550670	687760	727300		-5	2.59354	2.09404	0.960994	0.797909	1.16718	0.366643	1.00737	1.21032	1.00913	0.985663	1.23104	1.30182		-5	66.0635	53.3401	24.4787	20.3246	29.7308	9.33923	33.0442	39.7012	33.1017	32.332	40.3811	42.7026
		-6	851450	725090	676590	716880	559240	369270	473900	867000	361500	609730	841000	1225410		-6	1.24403	1.05941	0.98855	1.04742	0.817093	0.539532	0.848249	1.55187	0.647061	1.09138	1.50533	2.1934		-6	31.6884	26.9856	25.1806	26.6801	20.8132	13.7431	27.8245	50.905	21.2251	35.7996	49.3784	71.9486
		-7	559000	467770	565110	554960	690860	614880	901360	478830	519650	842530	725060	681790		-7	0.816742	0.683448	0.825669	0.810839	1.0094	0.898387	1.61337	0.857074	0.930139	1.50807	1.29781	1.22036		-7	20.8043	17.409	21.0317	20.6539	25.7117	22.884	52.9224	28.114	30.5107	49.4682	42.5711	40.0306
		-8	155650	178700	187780	620640	691750	1079560	466580	597170	700180	557840	817380	755060		-8	0.227417	0.261094	0.274361	0.906803	1.0107	1.57732	0.835147	1.06889	1.25328	0.998496	1.46306	1.35151		-8	5.79282	6.65067	6.9886	23.0983	25.7448	40.1779	27.3947	35.0622	41.1103	32.753	47.9916	44.3325
		-9	261420	178170	352070	212640	303170	338390	192560	287260	197550	735440	637940	751060		-9	0.381955	0.26032	0.514401	0.310683	0.442955	0.494414	0.34467	0.514176	0.353601	1.31639	1.14187	1.34435		-9	9.72926	6.63095	13.103	7.91382	11.2831	12.5938	11.306	16.8662	11.5989	43.1806	37.456	44.0977
		-10	465720	309260	462050	96120	268030	233370	174890	189600	271720	644750	609240	536530		-10	0.680453	0.451853	0.675091	0.140439	0.391612	0.340972	0.313041	0.339371	0.486361	1.15406	1.0905	0.960353		-10	17.3327	11.5097	17.1961	3.57729	9.97526	8.68532	10.2685	11.1322	15.9537	37.8558	35.7709	31.5018
		-11	58620	153110	183480	170010	211190	139290	333310	414740	174700	287810	270530	335330			0.0856483	0.223705	0.268078	0.248398	0.308565	0.203513	0.596603	0.742357	0.312701	0.515161	0.484231	0.600218			2.18166	5.69829	6.82857	6.32726	7.85985	5.18395	19.5699	24.351	10.2573	16.8985	15.8839	19.6885
		18A
			Trafo-MEM ohne PTX						Trafo-MEM ohne PTX							fold over WT basal	Trafo-MEM ohne PTX						Trafo-MEM ohne PTX							fold over WT 1 µM a-MSH [%]	Trafo-MEM ohne PTX						Trafo-MEM ohne PTX
			WT			Chim 7			WT			Chim 7					WT			Chim 7			WT			Chim 7					WT			Chim 7			WT			Chim 7
		basal	218850	696290	668290	323900	221400	375480	478390	1089300	427340	278040	555400	316260		basal	0.414638	1.31921	1.26616	0.613668	0.419469	0.711392	0.719373	1.63802	0.642607	0.418099	0.835175	0.475572		basal	10.7153	34.0917	32.7208	15.8588	10.8402	18.3842	27.7596	63.209	24.7973	16.1339	32.2283	18.3517
		-5	1887400	2705930	1693030	4290740	5847970	4116180	1486600	2874480	1884830	3420600	2765870	3016120		-5	3.57591	5.12671	3.20765	8.12933	11.0797	7.7986	2.23546	4.32246	2.83429	5.14368	4.15914	4.53545		-5	92.4107	132.488	82.894	210.083	286.328	201.536	86.2632	166.798	109.371	198.488	160.496	175.017
		-6	2507700	2021090	1598420	3233370	5303630	4891490	1772590	1765300	1632100	3339390	3558310	2982900		-6	4.75114	3.8292	3.0284	6.12601	10.0484	9.26752	2.66551	2.65455	2.45425	5.02156	5.35076	4.4855		-6	122.782	98.9565	78.2617	158.312	259.676	239.497	102.858	102.435	94.7062	193.775	206.479	173.089
		-7	1568710	503100	780650	4273700	3167200	4612240	2232760	2939470	2868170	3584640	4319120	4758770		-7	2.97211	0.953184	1.47904	8.09704	6.00064	8.73845	3.35748	4.42019	4.31297	5.39036	6.49482	7.15594		-7	76.8071	24.6327	38.2221	209.249	155.072	225.824	129.561	170.569	166.432	208.007	250.626	276.138
		-8	476300	575810	643830	3932080	3885720	4618240	2307620	2822060	1941280	4755720	4175710	4182280		-8	0.902408	1.09094	1.21981	7.4498	7.36197	8.74982	3.47005	4.24364	2.91917	7.15135	6.27917	6.28905		-8	23.3206	28.1928	31.5232	192.522	190.252	226.118	133.905	163.756	112.647	275.961	242.305	242.686
		-9	328980	336350	173400	1097650	754040	337430	493740	699590	468480	2528860	2629150	1933340		-9	0.623292	0.637256	0.328527	2.07963	1.42862	0.639302	0.742455	1.052	0.704471	3.80274	3.95355	2.90723		-9	16.1075	16.4683	8.49	53.7431	36.9193	16.5212	28.6503	40.5952	27.1846	146.743	152.562	112.186
		-10	965660	986310	670090	456820	287120	185410	650210	739630	467970	2270660	1963440	1270820		-10	1.82956	1.86868	1.26957	0.865501	0.543984	0.351282	0.977745	1.11221	0.703704	3.41447	2.9525	1.91098		-10	47.2806	48.2916	32.8089	22.3668	14.0579	9.07803	37.7299	42.9187	27.155	131.76	113.933	73.7421
			28410	217970	234750	315690	250280	171420	396700	683130	579360	448300	358960	386530			0.0538262	0.412971	0.444762	0.598113	0.474186	0.324776	0.596532	1.02725	0.871205	0.674125	0.539781	0.581239			1.39101	10.6722	11.4938	15.4568	12.2542	8.39305	23.0194	39.6401	33.6186	26.0136	20.8294	22.4293
		18B
			Trafo-MEM mit PTX						Trafo-MEM mit PTX							fold over WT basal	Trafo-MEM mit PTX						Trafo-MEM mit PTX							fold over WT 1 µM a-MSH [%]	Trafo-MEM mit PTX						Trafo-MEM mit PTX
			WT			Chim 7			WT			Chim 7					WT			Chim 7			WT			Chim 7					WT			Chim 7			WT			Chim 7
		basal	115720	345630	235980	222480	142730	205910	502440	434930	381290	215260	161020	207880		basal	0.219246	0.654838	0.447093	0.421515	0.270419	0.390121	0.755538	0.65402	0.57336	0.323694	0.242132	0.312597		basal	5.66587	16.9227	11.554	10.893	6.98834	10.0818	29.1552	25.2378	22.1252	12.4909	9.34354	12.0627
		-5	1326950	1203920	1174810	1019450	785070	1273290	628510	905230	1505940	851850	614450	755550		-5	2.51407	2.28097	2.22582	1.93147	1.48741	2.4124	0.945114	1.36123	2.26454	1.28096	0.923971	1.13615		-5	64.97	58.9462	57.521	49.9142	38.4385	62.3427	36.4707	52.528	87.3855	49.4305	35.6548	43.8424
		-6	1230320	1568890	819090	1447660	1137850	1206830	691400	820180	1004470	905240	769720	1243700		-6	2.33099	2.97245	1.55187	2.74277	2.15579	2.28649	1.03968	1.23333	1.51046	1.36124	1.15746	1.8702		-6	60.2388	76.8159	40.1042	70.8802	55.7113	59.0887	40.12	47.5927	58.2866	52.5285	44.6647	72.1684
		-7	607450	812410	564540	1629150	1252220	1591250	1284990	1019520	1122640	1168540	1441720	1261600		-7	1.15089	1.53921	1.06959	3.08662	2.37248	3.01482	1.93229	1.53309	1.68816	1.75718	2.16797	1.89711		-7	29.7419	39.7772	27.641	79.7663	61.3111	77.9107	74.5644	59.1599	65.1436	67.8071	83.659	73.2071
		-8	182290	539110	384290	1293560	1628530	1158770	948750	502280	1885640	1489580	1057590	1243140		-8	0.34537	1.02141	0.728084	2.45081	3.08545	2.19543	1.42667	0.755297	2.83551	2.23994	1.59034	1.86936		-8	8.92527	26.3959	18.8156	63.3352	79.736	56.7356	55.0533	29.1459	109.418	86.4361	61.369	72.1359
		-9	499470	336490	113970	321740	386160	233800	279690	164560	341220	1168240	873960	856910		-9	0.946306	0.637521	0.21593	0.609575	0.731627	0.442962	0.42058	0.247455	0.513105	1.75673	1.31421	1.28857		-9	24.455	16.4752	5.58019	15.753	18.9071	11.4473	16.2296	9.54895	19.8	67.7897	50.7134	49.7241
		-10	372900	456380	229110	319490	199750	145990	276410	406530	420890	1524070	1163570	1046240		-10	0.706504	0.864667	0.434077	0.605313	0.378451	0.276596	0.415648	0.611314	0.632908	2.2918	1.7497	1.57327		-10	18.2579	22.3452	11.2177	15.6428	9.78014	7.14795	16.0393	23.5898	24.4231	88.4375	67.5187	60.7104
		-11	84470	141100	85030	88310	200190	124320	627210	332510	393730	465440	458220	334040			0.160039	0.267331	0.1611	0.167314	0.379284	0.235539	0.943159	0.500008	0.592066	0.699899	0.689042	0.502308			4.13581	6.90853	4.16323	4.32383	9.80169	6.08695	36.3952	19.2946	22.847	27.0082	26.5892	19.3834
		19A
			Trafo-MEM ohne PTX						Trafo-MEM ohne PTX							fold over WT basal	Trafo-MEM ohne PTX						Trafo-MEM ohne PTX							fold over WT 1 µM a-MSH [%]	Trafo-MEM ohne PTX						Trafo-MEM ohne PTX
			WT			Chim 7			WT			Chim 7					WT			Chim 7			WT			Chim 7					WT			Chim 7			WT			Chim 7
		basal	264490	418750	230360	209880	96170	115430	227890	218050	423550	140510	142720	134490		basal	0.868509	1.37505	0.756436	0.689186	0.315795	0.379039	0.786289	0.752338	1.46137	0.484801	0.492427	0.464031		basal	7.36502	11.6606	6.41463	5.84435	2.67796	3.21428	5.75361	5.50518	10.6935	3.5475	3.6033	3.39551
		-5	2291660	5774100	4048630	1845740	3336350	1629100	2843560	3093110	3195870	2556440	2358500	2488540		-5	7.52515	18.9605	13.2945	6.06088	10.9556	5.3495	9.81113	10.6722	11.0267	8.82048	8.13753	8.58621		-5	63.8139	160.786	112.739	51.3967	92.9044	45.3641	71.7923	78.0927	80.6871	64.5433	59.5458	62.829
		-6	3516210	2490790	4766490	2033570	1147740	3313980	3920350	4327770	3634330	2594990	3485360	3575240		-6	11.5462	8.17904	15.6518	6.67766	3.76885	10.8822	13.5264	14.9321	12.5395	8.95349	12.0255	12.3356		-6	97.9128	69.3589	132.728	56.6271	31.9601	92.2815	98.9783	109.265	91.7571	65.5165	87.996	90.2652
		-7	1861420	1532360	1572920	3005560	2624430	3430180	3464650	4729110	3296750	3652880	5072700	4587370		-7	6.11237	5.03183	5.16502	9.8694	8.61787	11.2637	11.9541	16.3168	11.3748	12.6035	17.5023	15.8278		-7	51.8333	42.6703	43.7997	83.6932	73.0802	95.5172	87.4731	119.397	83.2341	92.2254	128.072	115.819
		-8	328050	227790	487830	2300930	2770700	1612580	2841800	2807810	2878220	2875800	2944410	4612430		-8	1.07722	0.747997	1.60189	7.55559	9.09818	5.29525	9.80506	9.68778	9.93072	9.92237	10.1591	15.9143		-8	9.13492	6.34307	13.5842	64.072	77.1533	44.9041	71.7478	70.8897	72.6673	72.6062	74.3385	116.451
		-9	257740	198590	232500	1155880	1053420	710640	1531030	1282330	1407120	1969070	4527470	3134680		-9	0.846344	0.652113	0.763463	3.79558	3.45913	2.33354	5.28251	4.42442	4.85498	6.79388	15.6211	10.8156		-9	7.17706	5.52996	6.47423	32.1868	29.3337	19.7886	38.6544	32.3754	35.526	49.7137	114.306	79.1423
		-10	251720	494620	404380	338680	334300	359320	268980	270280	463280	1808540	1983470	2364850		-10	0.826576	1.62419	1.32787	1.11213	1.09775	1.1799	0.928061	0.932547	1.59845	6.24	6.84356	8.15944		-10	7.00943	13.7733	11.2604	9.43093	9.30896	10.0057	6.79102	6.82385	11.6966	45.6608	50.0773	59.7061
		-11	47270	88980	112350	162280	81720	113120	260170	266350	276420	429410	372080	522120			0.155221	0.292185	0.368925	0.532881	0.268345	0.371454	0.897664	0.918987	0.953731	1.48159	1.28379	1.80147			1.31629	2.47775	3.12851	4.51887	2.27559	3.14995	6.56859	6.72462	6.97886	10.8415	9.39402	13.1821
		19B
			Trafo-MEM mit PTX						Trafo-MEM mit PTX							fold over WT basal	Trafo-MEM mit PTX						Trafo-MEM mit PTX							fold over WT 1 µM a-MSH [%]	Trafo-MEM mit PTX						Trafo-MEM mit PTX
			WT			Chim 7			WT			Chim 7					WT			Chim 7			WT			Chim 7					WT			Chim 7			WT			Chim 7
		basal	153850	131870	140060	65320	84250	141850	250530	264300	484250	79720	182430	82030		basal	0.505199	0.433023	0.459917	0.214492	0.276653	0.465795	0.864403	0.911914	1.67081	0.275058	0.629438	0.283028		basal	4.28413	3.67207	3.90013	1.81891	2.34604	3.94997	6.32521	6.67287	12.226	2.01272	4.60587	2.07104
		-5	2033900	2777570	1526890	1004680	925690	1765780	1469930	2114450	1938800	994670	1298250	781360		-5	6.67874	9.12074	5.01387	3.29908	3.0397	5.79831	5.0717	7.29548	6.68944	3.43191	4.47935	2.69593		-5	56.6362	77.3446	42.518	27.9764	25.7769	49.1701	37.1118	53.3842	48.9495	25.1128	32.7773	19.7272
		-6	2327760	3451130	2421590	941420	962470	1311440	2615910	1751780	4510900	1537640	1194760	1281000		-6	7.6437	11.3325	7.95181	3.09135	3.16048	4.30639	9.02567	6.04416	15.564	5.30532	4.12228	4.41983		-6	64.8191	96.1006	67.4319	26.2149	26.8011	36.5185	66.0447	44.2277	113.888	38.8213	30.1645	32.3418
		-7	468790	1794470	2051510	938940	1573040	1253840	2571660	2749980	2166080	1659730	1239090	1188240		-7	1.53937	5.89252	6.73657	3.08321	5.16541	4.11725	8.87299	9.48825	7.47362	5.72656	4.27523	4.09978		-7	13.054	49.969	57.1266	26.1458	43.8031	34.9146	64.9275	69.4296	54.6877	41.9037	31.2837	29.9999
		-8	275140	422340	977720	1139960	1674230	990250	2716050	2016950	2729120	1037980	1743610	1233690		-8	0.903481	1.38684	3.21055	3.7433	5.49769	3.2517	9.37118	6.95908	9.41628	3.58134	6.01597	4.2566		-8	7.66158	11.7605	27.2257	31.7435	46.6208	27.5746	68.573	50.9226	68.903	26.2062	44.0215	31.1474
		-9	341950	269620	408400	905010	1306900	1450750	1142880	1821140	1453430	1794310	1172490	812420		-9	1.12287	0.885355	1.34107	2.97179	4.29148	4.76385	3.94328	6.28348	5.01477	6.19091	4.04544	2.80309		-9	9.52198	7.50787	11.3724	25.201	36.3921	40.3978	28.8547	45.9789	36.6952	45.3015	29.6022	20.5114
		-10	352110	710240	331910	284880	373360	283940	428610	882850	353990	861180	1586770	823860		-10	1.15623	2.33222	1.0899	0.935464	1.22601	0.932377	1.47883	3.0461	1.22137	2.97133	5.47483	2.84256		-10	9.8049	19.7774	9.24241	7.93281	10.3966	7.90663	10.8213	22.2896	8.9373	21.7425	40.0617	20.8003
		-11	83690	26650	93600	94600	98460	89630	208830	398390	218230	457070	267060	378300			0.274814	0.0875109	0.307356	0.310639	0.323314	0.294319	0.720526	1.37456	0.752959	1.57703	0.921437	1.30525			2.33044	0.742099	2.6064	2.63424	2.74173	2.49585	5.2724	10.0583	5.50972	11.5398	6.74255	9.55106
		20A
			Trafo-MEM ohne PTX						Trafo-MEM ohne PTX							fold over WT basal	Trafo-MEM ohne PTX						Trafo-MEM ohne PTX							fold over WT 1 µM a-MSH [%]	Trafo-MEM ohne PTX						Trafo-MEM ohne PTX
			WT			Chim 7			WT			Chim 7					WT			Chim 7			WT			Chim 7					WT			Chim 7			WT			Chim 7
		basal	13240	201860	267880	58230	94700	92860	389530	257510	230410	98380	131170	144200		basal	0.0822394	1.25384	1.66392	0.361692	0.588223	0.576794	1.3318	0.880426	0.787771	0.336361	0.44847	0.49302		basal	8.22394	125.384	166.392	36.1692	58.8223	57.6794	133.18	88.0426	78.7771	33.6361	44.847	49.302
		-5	1794240	4817530	4477810	1582520	2839620	2427240	1999620	5342420	1802510	2685750	4451620	1203230		-5	11.1448	29.9238	27.8136	9.82972	17.6381	15.0766	6.8367	18.2657	6.16278	9.18257	15.2201	4.11384		-5	1114.48	2992.38	2781.36	982.972	1763.81	1507.66	683.67	1826.57	616.278	918.257	1522.01	411.384
		-6	3541420	3495250	3161920	1323020	2520680	718510	5847670	4898160	4065810	1025420	3183810	5638590		-6	21.9973	21.7105	19.6401	8.21786	15.657	4.46298	19.9932	16.7468	13.901	3.50591	10.8854	19.2783		-6	2199.73	2171.05	1964.01	821.786	1565.7	446.298	1999.32	1674.68	1390.1	350.591	1088.54	1927.83
		-7	3135300	4808930	3352820	1849010	1178020	4131050	1904500	3370100	5078790	2304830	6158040	3929990		-7	19.4747	29.8704	20.8258	11.485	7.3172	25.6598	6.51148	11.5224	17.3644	7.88021	21.0543	13.4366		-7	1947.47	2987.04	2082.58	1148.5	731.72	2565.98	651.148	1152.24	1736.44	788.021	2105.43	1343.66
		-8	930	512250	1889230	1432750	2466830	2117980	3857830	5597570	1317710	6335030	4045290	4343770		-8	0.00577664	3.18181	11.7348	8.89944	15.3226	13.1557	13.1899	19.1381	4.50525	21.6595	13.8308	14.8513		-8	0.577664	318.181	1173.48	889.944	1532.26	1315.57	1318.99	1913.81	450.525	2165.95	1383.08	1485.13
		-9	342850	222340	330370	1745520	2066090	2467120	2416530	4005810	1636680	3719590	4306190	3067170		-9	2.12959	1.38105	2.05207	10.8422	12.8334	15.3244	8.26211	13.6959	5.59581	12.7173	14.7229	10.4866		-9	212.959	138.105	205.207	1084.22	1283.34	1532.44	826.211	1369.59	559.581	1271.73	1472.29	1048.66
		-10	174130	270080	242160	602170	459460	1097160	604730	600150	536050	3224490	2755650	5231770		-10	1.0816	1.67758	1.50416	3.74034	2.85391	6.81494	2.06757	2.05191	1.83275	11.0245	9.42156	17.8874		-10	108.16	167.758	150.416	374.034	285.391	681.494	206.757	205.191	183.275	1102.45	942.156	1788.74
			20520	57170	81210	34720	121420	86490	106780	254940	228670	962250	1447840	712670			0.127459	0.355108	0.504431	0.215661	0.754193	0.537227	0.365081	0.871639	0.781822	3.28993	4.95016	2.43662			12.7459	35.5108	50.4431	21.5661	75.4193	53.7227	36.5081	87.1639	78.1822	328.993	495.016	243.662
		20B
			Trafo-MEM mit PTX						Trafo-MEM mit PTX							fold over WT basal	Trafo-MEM ohne PTX						Trafo-MEM ohne PTX							fold over WT 1 µM a-MSH [%]	Trafo-MEM ohne PTX						Trafo-MEM ohne PTX
			WT			Chim 7			WT			Chim 7					WT			Chim 7			WT			Chim 7					WT			Chim 7			WT			Chim 7
		basal	223230	429820	786150	130960	176200	231990	287490	449660	270880	123250	263090	97060		basal	1.38658	2.6698	4.88312	0.81345	1.09446	1.44099	0.982928	1.53739	0.926138	0.421392	0.899504	0.331848		basal	138.658	266.98	488.312	81.345	109.446	144.099	98.2928	153.739	92.6138	42.1392	89.9504	33.1848
		-5	3188640	1268920	1415100	991220	965130	1196680	1298110	1912260	2166740	495160	1129920	389420		-5	19.806	7.88182	8.7898	6.1569	5.99484	7.4331	4.43824	6.53801	7.40808	1.69295	3.86319	1.33143		-5	1980.6	788.182	878.98	615.69	599.484	743.31	443.824	653.801	740.808	169.295	386.319	133.143
		-6	2063640	1733080	907880	844610	582730	1158380	1234730	1120930	1842460	919650	1667520	971240		-6	12.8182	10.7649	5.63924	5.24624	3.61959	7.1952	4.22154	3.83246	6.29937	3.14428	5.70125	3.32067		-6	1281.82	1076.49	563.924	524.624	361.959	719.52	422.154	383.246	629.937	314.428	570.125	332.067
		-7	1354090	882340	1253190	1409000	840260	997780	1004790	1158400	1847070	970180	609260	720770		-7	8.41085	5.4806	7.78411	8.75192	5.21922	6.19765	3.43538	3.96057	6.31513	3.31704	2.08306	2.46431		-7	841.085	548.06	778.411	875.192	521.922	619.765	343.538	396.057	631.513	331.704	208.306	246.431
		-8	464590	819470	1003340	1163560	298690	673950	1369590	1581030	1717780	837530	574240	1074130		-8	2.88577	5.09009	6.23218	7.22738	1.85529	4.1862	4.68263	5.40554	5.87309	2.86351	1.96333	3.67245		-8	288.577	509.009	623.218	722.738	185.529	418.62	468.263	540.554	587.309	286.351	196.333	367.245
		-9	269260	132290	94280	1229680	204930	592930	1013760	389160	857110	931700	1392650	989690		-9	1.67249	0.821711	0.585614	7.63808	1.27291	3.68295	3.46604	1.33054	2.93046	3.18548	4.76147	3.38375		-9	167.249	82.1711	58.5614	763.808	127.291	368.295	346.604	133.054	293.046	318.548	476.147	338.375
		-10	198610	256350	109450	719100	319420	421430	302380	338180	586170	866430	1214200	1611650		-10	1.23365	1.5923	0.679842	4.46664	1.98406	2.61769	1.03384	1.15624	2.00411	2.96232	4.15135	5.51023		-10	123.365	159.23	67.9842	446.664	198.406	261.769	103.384	115.624	200.411	296.232	415.135	551.023
		-11	120490	32570	58370	178650	63300	109070	123680	538230	301210	617830	694520	1024590			0.748416	0.202307	0.362562	1.10967	0.393184	0.677481	0.422862	1.84021	1.02984	2.11236	2.37456	3.50307			74.8416	20.2307	36.2562	110.967	39.3184	67.7481	42.2862	184.021	102.984	211.236	237.456	350.307

## Sheet: basal-stim all ligands
			Assay 1 (alphaMSH)			fold over WT basal			Assay 1 (Setmelanotide)			fold over WT basal							Assay 2 (alphaMSH)									fold over WT basal									Assay 2 (Setmelanotide)									fold over WT basal
	MC4RWT	basal	220260	158560	350370	0.906184	0.65234	1.44148	437720	166780	341480	1.38815	0.528912	1.08294			MC4R	basal	78610	63870	44830	68570	42730	67470	72380	28280	35380	1.40901	1.14481	0.803533	1.22905	0.765893	1.20933	1.29734	0.506891	0.634151	24590	57740	73670	89580	75970	75090	69190	107180	173580	0.296428	0.696045	0.888078	1.07987
	Chim1	basal	115510	176080	125170	0.475226	0.72442	0.514969	176450	199830	232370	0.559578	0.633724	0.736918			H158R	basal	75470	42510	62650							1.35272	0.761949	1.12294							86190	79500	119210							1.039	0.958357	1.43705
	Chim2	basal	164390	256550	312470	0.676326	1.05549	1.28555	212580	450210	226360	0.674158	1.42776	0.717859			Chim4	basal	170800	164310	149560							3.06142	2.94509	2.68071							186810	73140	92500							2.25196	0.881689	1.11507
	H158R	basal	101270	114450	144970	0.41664	0.470865	0.596429	139170	131930	194580	0.441352	0.418392	0.617074			Chim5	basal	87960	58630	88470							1.5766	1.05088	1.58574							65580	54960	71920							0.790554	0.662532	0.866982
	Chim4	basal	206820	193250	170050	0.850889	0.79506	0.699612	194730	158920	145360	0.61755	0.503985	0.460982			Chim6	basal	42810	65980	73690							0.767327	1.18263	1.32082							45440	67060	74400							0.547771	0.808396	0.896878
	Chim5	basal	108400	129250	129420	0.445974	0.531754	0.532454	117350	106080	170930	0.372154	0.336413	0.542073			Chim7	basal	90060	53050	80450							1.61424	0.950868	1.44199							83110	46330	47550							1.00188	0.558499	0.573206
	Chim6	basal	227690	145680	107350	0.936752	0.59935	0.441654	612930	386920	518290	1.94379	1.22704	1.64366			GHSR	basal	486670	482430	388640							8.72307	8.64708	6.96598							436590	376290	666060							5.26301	4.5361	8.02923
	Chim7	basal	72460	15230	520	0.298112	0.0626586	0.00213936	482310	468130	653480	1.52956	1.48459	2.07239			pcDPs	basal	23380	25790	32520							0.419063	0.46226	0.582889							26230	45930	41380							0.316198	0.553677	0.498828
	GHSR	basal	607910	683660	528510	2.50104	2.81268	2.17437	775350	675890	780570	2.45888	2.14346	2.47543
	pcDPs	basal	46090	53280	41550	0.189621	0.219202	0.170943	26370	57140	22900	0.0836276	0.181209	0.0726231
	Mittelwert WT basal		243063						315327								Mittelwert WT basal		55791.1																		82954.4
																			Assay 3 (alphaMSH)									fold over WT basal									Assay 3 (Setmelanotide)									fold over WT basal
																	MC4R	basal	112710	24250	16880	21910	106510	81820	198500	73750	91200	1.39429	0.299988	0.208816	0.27104	1.3176	1.01216	2.45557	0.912334	1.1282	90670	106830	66280	198680	154720	153830	140330	147260	63910	0.726969	0.856536	0.531416	1.59297
			Assay 6 (alphaMSH)			fold over WT basal			Assay 6 (Setmelanotide)			fold over WT basal					H158R	basal	28610	58040	88670							0.353924	0.717991	1.0969							91280	33150	88270							0.73186	0.265788	0.707726
	MC4RWT	basal	124010	163700	161220	0.828704	1.09393	1.07736	50000	54220	91080	0.768049	0.832873	1.39908			Chim4	basal	219990	129000	162760							2.72141	1.59581	2.01344							156830	140090	148110							1.25742	1.12321	1.18751
	Chim1	basal	162160	79950	72470	1.08364	0.53427	0.484285	57520	115170	68620	0.883564	1.76912	1.05407			Chim5	basal	83330	60910	89470							1.03084	0.753495	1.1068							46840	66510	38920							0.375551	0.53326	0.312051
	Chim2	basal	92340	105950	111880	0.617067	0.708017	0.747644	91550	98410	129840	1.4063	1.51167	1.99447			Chim6	basal	77020	110120	108170							0.952785	1.36225	1.33813							125220	67980	49150							1.00398	0.545046	0.394072
	Chim3	basal	89120	83370	57210	0.595549	0.557125	0.382309	66840	81810	80770	1.02673	1.25668	1.24071			Chim7	basal	72030	54120	92080							0.891056	0.669498	1.13909							88200	30370	110550							0.707165	0.243499	0.886362
																	GHSR	basal	61760	62890	73810							0.76401	0.777989	0.913076							64350	67770	54370							0.515942	0.543363	0.435925
	Mittelwert WT basal		149643						65100								pcDPs	basal	26700	22700	22110							0.330296	0.280813	0.273514							38150	73170	36490							0.305877	0.586658	0.292568
																	Mittelwert WT basal		80836.7																		124723
			Assay 7 (alphaMSH)			fold over WT basal			Assay 7 (Setmelanotide)			fold over WT basal
	MC4RWT	basal	67960	91760	45120	0.995313	1.34388	0.660808	103440	89440	88500	1.10285	0.953586	0.943564					Assay 4 (alphaMSH)									fold over WT basal									Assay 4 (Setmelanotide)									fold over WT basal
	Chim1	basal	197410	108090	123630	2.89118	1.58304	1.81063	103850	196080	109790	1.10722	2.09055	1.17055			MC4R	basal	119950	209420	119590	70120	137990	116750	205160	146170	149340	0.847045	1.47885	0.844503	0.495163	0.974437	0.824447	1.44877	1.0322	1.05459	102260	117180	204400	157100	169550	134030	165090	410840	186420	0.558842	0.640378	1.11703	0.858538
	Chim2	basal	299570	297830	157770	4.38738	4.36189	2.31063	384210	120690	158970	4.09635	1.28677	1.6949			H158R	basal	164560	79460	98360							1.16206	0.561119	0.694584							139280	213660	178010							0.761153	1.16763	0.972809
	Chim3	basal	97910	147580	34870	1.43395	2.16139	0.510691	67330	130980	94390	0.717855	1.39647	1.00636			Chim4	basal	255210	128760	347160							1.8022	0.909258	2.45152							119870	114440	224130							0.655079	0.625405	1.22485
																	Chim5	basal	104250	114380	98810							0.736177	0.807711	0.697761							122920	129580	100300							0.671747	0.708143	0.548131
	Mittelwert WT basal		68280						93793.3								Chim6	basal	115330	131690	160540							0.81442	0.929948	1.13368							91960	125310	294650							0.502553	0.684808	1.61024
																	Chim7	basal	88200	112480	75350							0.622837	0.794294	0.532095							97590	107550	138040							0.533321	0.587751	0.754376
																	GHSR	basal	523260	879470	715910							3.69508	6.21051	5.0555							967130	868330	677080							5.28528	4.74535	3.70018
			Assay 8 (alphaMSH)			fold over WT basal			Assay 8 (Setmelanotide)			fold over WT basal					pcDPs	basal	30040	53230	66960							0.212132	0.375892	0.472848							61830	66010	51280							0.337896	0.360739	0.280241
	MC4RWT	basal	56100	127130	96450	0.601759	1.36367	1.03458	120970	90330	200990	0.88023	0.65728	1.46249
	Chim1	basal	70340	55850	140240	0.754505	0.599078	1.50429	98950	113880	139510	0.720003	0.82864	1.01513			Mittelwert WT basal		141610																		182986
	Chim2	basal	273740	115640	225000	2.93628	1.24042	2.41347	77270	84110	221450	0.56225	0.612021	1.61137
	Chim3	basal	67240	47530	188730	0.721253	0.509833	2.02442	32510	51210	23680	0.236557	0.372626	0.172306					Assay 5 (alphaMSH)									fold over WT basal									Assay 5 (Setmelanotide)									fold over WT basal
																	MC4R	basal	154650	62540	97400	57510	88100	57690	92950	63640	158350	1.67123	0.67584	1.05256	0.621483	0.952055	0.623429	1.00447	0.687727	1.71121	49970	61540	86540	143840	229740	211880	163090	122060	78490	0.392041	0.482814	0.678952	1.1285
	Mittelwert WT basal		93226.7						137430								H158R	basal	114980	115390	117290							1.24253	1.24697	1.2675							126620	123780	88380							0.993401	0.97112	0.693388
																	Chim4	basal	148390	170990	106050							1.60358	1.84781	1.14603							131800	104200	97700							1.03404	0.817504	0.766508
			Assay 9 (alphaMSH)			fold over WT basal			Assay 9 (Setmelanotide)			fold over WT basal					Chim5	basal	146660	78390	124450							1.58489	0.847124	1.34487							68500	98020	110330							0.537419	0.769019	0.865597
	MC4RWT	basal	187100	142600	147780	1.17555	0.895954	0.9285	132050	165090	124360	0.939858	1.17502	0.885125			Chim6	basal	126760	330880	112290							1.36984	3.57566	1.21346							248090	97890	75320							1.9464	0.767999	0.590925
	Chim1	basal	49350	73780	62770	0.310065	0.463559	0.394383	51260	65580	109650	0.36484	0.466762	0.780427			Chim7	basal	91340	80460	110090							0.987068	0.869493	1.18969							66460	52310	83730							0.521414	0.4104	0.656906
	Chim2	basal	151050	185270	146890	0.949045	1.16405	0.922908	115720	107560	138140	0.82363	0.765552	0.983203			GHSR	basal	287080	368940	339410							3.10234	3.98696	3.66784							334020	419450	345470							2.62056	3.29081	2.7104
	Chim3	basal	107010	139810	43800	0.672342	0.878424	0.275195	61730	71670	40500	0.439359	0.510107	0.288256			pcDPs	basal	35860	39830	48760							0.387522	0.430424	0.526926							14740	16430	19810							0.115643	0.128902	0.15542
	Mittelwert WT basal		159160														Mittelwert WT basal		92536.7																		127461
			Assay 10 (Setmelanotide)						fold over WT basal
	MC4RWT	basal	112390	303060	398240	192670	274470	248890	0.440826	1.18869	1.56201	0.755707	1.07655	0.976218
	Chim 4	basal	199840	288830	316280				0.78383	1.13287	1.24054
	Chim 7	basal	159180	234530	179500				0.62435	0.919894	0.70405
	Mittelwert WT basal		254953
			Assay 11 (Setmelanotide)						fold over WT basal
	MC4RWT	basal	102440	63030	80860	73970	77160	65430	1.32783	0.816998	1.04811	0.958802	1.00015	0.848106
	Chim 4	basal	67530	89660	110840				0.875327	1.16218	1.43671
	Chim 7	basal	59010	65220	118050				0.76489	0.845384	1.53017
	Mittelwert WT basal		77148.3
			Assay 12 (Setmelanotide)						fold over WT basal
	MC4RWT	basal	77030	72560	110130	68550	124510	94660	0.844257	0.795265	1.20704	0.751315	1.36464	1.03748
	Chim 4	basal	92770	80220	90280				1.01677	0.87922	0.989478
	Chim 7	basal	78450	87530	68820				0.85982	0.959338	0.754274
	Experimente mit PTX
	ohnePTX		Assay 13A (alphaMSH)			fold over WT basal			Assay 13A (Setmelanotide)			fold over WT basal
	MC4RWT	basal	129320	91360	161660	1.0147	0.716849	1.26845	142280	107990	137660	1.11639	0.847335	1.08014
	Chim7	basal	47500	49400	59660	0.372705	0.387613	0.468117	72000	56840	40670	0.564942	0.44599	0.319114
	pcDPs	basal	36650	54260	37150	0.287571	0.425747	0.291494
	Mittelwert WT basal		127447						127447
	mit PTX
			Assay 13B (alphaMSH)			fold over WT basal			Assay 13B (Setmelanotide)			fold over WT basal
	MC4RWT	basal	101910	128960	105070	0.910073	1.15163	0.938293	164360	115740	136910	1.46776	1.03358	1.22263
	Chim7	basal	43360	46540	67210	0.387212	0.41561	0.600196	47040	60960	49970	0.420075	0.544383	0.44624
	Mittelwert WT basal		111980						111980
			Assay 14A (alphaMSH)			fold over WT basal			Assay 14A (Setmelanotide)			fold over WT basal
	MC4RWT	basal	21930	31380	15730	0.952926	1.36356	0.683517	19480	18270	21660	0.846466	0.793888	0.941194
	Chim7	basal	13510	11010	20630	0.587051	0.478418	0.896437	18110	18130	16420	0.786935	0.787804	0.713499
	Mittelwert WT basal		23013.3						23013.3
	mit PTX		Assay 14B (alphaMSH)			fold over WT basal			Assay 14B (Setmelanotide)			fold over WT basal
	MC4RWT	basal	40660	15910	22310	1.5464	0.605096	0.848504	28140	16050	16350	1.07023	0.610421	0.621831
	Chim7	basal	27710	27910	25820	1.05388	1.06149	0.981998	15860	16790	23960	0.603195	0.638565	0.911258
	Mittelwert WT basal		26293.3						26293.3
			Assay 15A (alphaMSH)			fold over WT basal			Assay 15A (Setmelanotide)			fold over WT basal
	MC4RWT	basal	98920	106160	69670	1.08011	1.15916	0.760728	56730	104830	138740	0.619436	1.14464	1.5149
	Chim7	basal	81520	64000	51310	0.890118	0.698817	0.560255	48970	44670	110530	0.534704	0.487753	1.20688
	Mittelwert WT basal		91583.3
	mit PTX		Assay 15B (alphaMSH)			fold over WT basal			Assay 15B (Setmelanotide)			fold over WT basal
	MC4RWT	basal	91290	343210	86420	0.525743	1.97656	0.497696	85000	89870	324030	0.489519	0.517565	1.8661
	Chim7	basal	62250	58250	57280	0.3585	0.335464	0.329878	54850	89450	53870	0.315883	0.515146	0.31024
	Mittelwert WT basal		173640						173640
			Assay 16A (alphaMSH)			fold over WT basal			Assay 16A (Setmelanotide)			fold over WT basal
	MC4RWT	basal	31430	30150	83720	0.648933	0.622505	1.72856	56570	97240	84150	1.168	2.00771	1.73744
	Chim7	basal	37590	56910	30250	0.776118	1.17502	0.62457	83260	76250	57650	1.71906	1.57433	1.1903
	Mittelwert WT basal		48433.3						48433.3
	mit PTX		Assay 16B (alphaMSH)			fold over WT basal			Assay 16B (Setmelanotide)			fold over WT basal
	MC4RWT	basal	65830	53590	69690	1.04431	0.85014	1.10555	78930	110400	122060	1.25213	1.75136	1.93633
	Chim7	basal	28280	61630	55900	0.448628	0.977685	0.886785	45660	124490	77570	0.72434	1.97488	1.23055
	Mittelwert WT basal		63036.7						63036.7
			Assay 17A (alphaMSH)			fold over WT basal			Assay 17A (Setmelanotide)			fold over WT basal
	MC4RWT	basal	288950	1134160	630170	0.422178	1.65709	0.920727	569910	657770	448360	0.832682	0.961053	0.655088
	Chim7	basal	174260	224190	270060	0.254607	0.327559	0.394578	231920	246180	324790	0.338853	0.359688	0.474543
	Mittelwert WT basal		684427						684427
	mit PTX		Assay 17B (alphaMSH)			fold over WT basal			Assay 17B (Setmelanotide)			fold over WT basal
	MC4RWT	basal	64360	431610	558570	0.183094	1.22786	1.58904	268350	337130	370860	0.763413	0.959082	1.05504
	Chim7	basal	166890	235310	125080	0.474776	0.66942	0.355833	235570	128680	147500	0.67016	0.366074	0.419614
	Mittelwert WT basal		351513						351513
			Assay 18A (alphaMSH)			fold over WT basal			Assay 18A (Setmelanotide)			fold over WT basal
	MC4RWT	basal	218850	696290	668290	0.414638	1.31921	1.26616	478390	1089300	427340	0.906368	2.06381	0.809647
	Chim7	basal	323900	221400	375480	0.613668	0.419469	0.711392	278040	555400	316260	0.52678	1.05227	0.599193
	Mittelwert WT basal		527810						527810
	mit PTX		Assay 18B (alphaMSH)			fold over WT basal			Assay 18B (Setmelanotide)			fold over WT basal
	MC4RWT	basal	115720	345630	235980	0.497842	1.48694	1.01522	502440	434930	381290	2.16156	1.87112	1.64036
	Chim7	basal	222480	142730	205910	0.957137	0.614042	0.88585	215260	161020	207880	0.926075	0.692728	0.894325
	Mittelwert WT basal		232443						232443
			Assay 19A (alphaMSH)			fold over WT basal			Assay 19A (Setmelanotide)			fold over WT basal
	MC4RWT	basal	264490	418750	230360	0.868509	1.37505	0.756436	227890	218050	423550	0.748325	0.716014	1.39082
	Chim7	basal	209880	96170	115430	0.689186	0.315795	0.379039	140510	142720	134490	0.461394	0.468651	0.441627
	Mittelwert WT basal		304533						304533
	mit PTX		Assay 19B (alphaMSH)			fold over WT basal			Assay 19B (Setmelanotide)			fold over WT basal
	MC4RWT	basal	153850	131870	140060	1.08401	0.929142	0.986848	250530	264300	484250	1.76521	1.86223	3.41197
	Chim7	basal	65320	84250	141850	0.460238	0.593616	0.99946	79720	182430	82030	0.561699	1.28538	0.577975
	Mittelwert WT basal		141927						141927
			Assay 20A (alphaMSH)			fold over WT basal			Assay 20A (Setmelanotide)			fold over WT basal
	MC4RWT	basal	13240	201860	267880	0.0822394	1.25384	1.66392	389530	257510	230410	2.41954	1.59951	1.43118
	Chim7	basal	58230	94700	92860	0.361692	0.588223	0.576794	98380	131170	144200	0.611081	0.814754	0.895689
	Mittelwert WT basal		160993						160993
	mit PTX		Assay 20B (alphaMSH)			fold over WT basal			Assay 20B (Setmelanotide)			fold over WT basal
	MC4RWT	basal	223230	429820	786150	0.465321	0.895956	1.63872	287490	449660	270880	0.59927	0.937312	0.564647
	Chim7	basal	130960	176200	231990	0.272985	0.367287	0.483581	123250	263090	97060	0.256914	0.548409	0.202321
	Mittelwert WT basal		91240
			Assay 1 (alphaMSH)			fold over WT basal			fold over WT 1 µM a-MSH [%]										Assay 2 (alphaMSH)									fold over WT basal									fold over WT 1 µM a-MSH [%]
	MC4RWT	10-6M alpha-MSH	4595890	3789300	3962190	18.9082	15.5898	16.3011	111.665	92.0673	96.268						MC4R	10-6M alpha-MSH	240590	76830	142800	971650	414290	255140	482230	171780	741930	4.31234	1.3771	2.55955	17.4159	7.42573	4.57313	8.64349	3.07899	13.2984	61.9148	19.7719	36.749	250.05	106.616	65.6592	124.1	44.2069	190.933
	Chim1	10-6M alpha-MSH	86060	110990	153340	0.354064	0.45663	0.630864	2.09097	2.69669	3.72565						H158R	10-6M alpha-MSH	1515530	813740	2241240							27.1644	14.5855	40.172							390.015	209.413	576.774
	Chim2	10-6M alpha-MSH	456480	383730	691460	1.87803	1.57872	2.84477	11.0909	9.32335	16.8002						Chim4	10-6M alpha-MSH	1952640	1862600	2452580							34.9991	33.3852	43.96							502.504	479.332	631.161
	H158R	10-6M alpha-MSH	2671610	1732130	3420420	10.9914	7.12625	14.0721	64.9112	42.085	83.1048						Chim5	10-6M alpha-MSH	1452430	741690	1420340							26.0334	13.2941	25.4582							373.777	190.871	365.519
	Chim4	10-6M alpha-MSH	928310	1132520	1283240	3.81921	4.65936	5.27945	22.5548	27.5164	31.1784						Chim6	10-6M alpha-MSH	2928110	3814750	2650030							52.4835	68.3756	47.4991							753.537	981.71	681.974
	Chim5	10-6M alpha-MSH	2865610	3268570	2867010	11.7896	13.4474	11.7953	69.6247	79.4153	69.6587						Chim7	10-6M alpha-MSH	2048290	2571630	4375140							36.7136	46.0939	78.42							527.119	661.798	1125.92
	Chim6	10-6M alpha-MSH	1600290	2544710	4436320	6.58384	10.4693	18.2517	38.8817	61.8279	107.788						pcDPs	10-5M alpha-MSH	19250	20880	34090							0.345037	0.374253	0.611029							4.95391	5.37338	8.77292
	Chim7	10-6M alpha-MSH	2651420	3469110	3246660	10.9084	14.2725	13.3573	64.4206	84.2878	78.883
	pcDPs	10-5M alpha-MSH	63970	57860	47610	0.263182	0.238045	0.195875	1.55426	1.4058	1.15676						Mittelwert WT1 µM a-MSH											6.96495
	Mittelwert WT1 µM a-MSH					16.933
			Assay 1 (Setmelanotide)			fold over WT basal			fold over WT 1 µM a-MSH [%]
	MC4RWT	10-6M Setmelanotide	3242890	4584080	5182630	10.2842	14.5376	16.4357	74.7807	105.708	119.511								Assay 2 (Setmelanotide)									fold over WT basal									fold over WT 1 µM a-MSH [%]
	Chim1	10-6M Setmelanotide	152920	270080	187340	0.484957	0.856509	0.594114	3.52632	6.22802	4.32004						MC4R	10-6M Setmelanotide	412350	525210	524350	2911160	2496310	1624240	759420	1586070	1866540	4.9708	6.33131	6.32094	35.0935	30.0925	19.5799	9.15466	19.1198	22.5008	29.2087	37.2031	37.1421	206.211	176.825	115.052	53.7932	112.349	132.216
	Chim2	10-6M Setmelanotide	585580	441970	659990	1.85706	1.40163	2.09304	13.5034	10.1918	15.2193						H158R	10-6M Setmelanotide	2112370	2210950	2682950							25.4642	26.6526	32.3425							149.629	156.612	190.046
	H158R	10-6M Setmelanotide	3380880	3579040	5515050	10.7218	11.3503	17.49	77.9627	82.5323	127.176						Chim4	10-6M Setmelanotide	1273230	924580	905330							15.3485	11.1456	10.9136							90.1888	65.4923	64.1287
	Chim4	10-6M Setmelanotide	1488510	1382070	1443060	4.72053	4.38298	4.5764	34.3249	31.8704	33.2768						Chim5	10-6M Setmelanotide	1905430	896600	418220							22.9696	10.8083	5.04156							134.97	63.5103	29.6245
	Chim5	10-6M Setmelanotide	1731420	1798870	3372850	5.49088	5.70478	10.6964	39.9264	41.4818	77.7776						Chim6	10-6M Setmelanotide	1641190	2265630	2445910							19.7842	27.3117	29.485							116.253	160.485	173.255
	Chim6	10-6M Setmelanotide	1760520	1977070	1943480	5.58316	6.26991	6.16339	40.5974	45.591	44.8164						Chim7	10-6M Setmelanotide	2015450	2853720	2449510							24.2959	34.4011	29.5284							142.764	202.142	173.51
	Chim7	10-6M Setmelanotide	2056730	2445740	3128460	6.52254	7.75621	9.92133	47.428	56.3985	72.142						pcDPs	10-5M Setmelanotide	42050	30070	29760							0.506905	0.362488	0.358751							2.9786	2.13	2.10804
	pcDPs	10-6M Setmelanotide	27720	36910	34910	0.0879088	0.117053	0.110711	0.63922	0.851141	0.805021
																	Mittelwert WT1 µM a-MSH											17.0182
	Mittelwert WT1 µM a-MSH					13.7525
			Assay 6 (alphaMSH)			fold over WT basal			fold over WT 1 µM a-MSH [%]										Assay 3 (alphaMSH)									fold over WT basal									fold over WT 1 µM a-MSH [%]
	MC4RWT	10-6M alpha-MSH	1573180	1749410	1674330	10.5129	11.6905	11.1888	94.449	105.029	100.522						MC4R	10-6M alpha-MSH	1326390	190080	233600	89560	906660	1279670	321550	985330	263470	16.4083	2.35141	2.88978	1.10791	11.2159	15.8303	3.97777	12.1891	3.25929	213.31	30.5687	37.5676	14.4031	145.809	205.797	51.7118	158.461	42.3713
	Chim1	10-6M alpha-MSH	39690	49260	70310	0.265231	0.329183	0.469851	2.38287	2.95742	4.2212						H158R	10-6M alpha-MSH	539610	404110	1952060							6.67531	4.99909	24.1482							86.7802	64.9891	313.931
	Chim2	10-6M alpha-MSH	317730	493040	270540	2.12325	3.29477	1.8079	19.0756	29.6006	16.2424						Chim4	10-6M alpha-MSH	1369680	1643070	1717350							16.9438	20.3258	21.2447							220.272	264.239	276.185
	Chim3	10-6M alpha-MSH	84830	63890	96730	0.566881	0.426949	0.646404	5.09294	3.83576	5.80738						Chim5	10-6M alpha-MSH	3800890	3280900	2370290							47.0194	40.5868	29.322							611.26	527.635	381.191
	pcDPs	10-5M alpaMSH															Chim6	10-6M alpha-MSH	1186350	2262930	1767270							14.6759	27.9939	21.8622							190.789	363.925	284.213
	Mittelwert WT1 µM a-MSH					11.1307
									fold over WT 1 µM a-MSH [%]								Chim7	10-6M alpha-MSH	4146020	2447100	1194030							51.2889	30.2722	14.7709							666.764	393.543	192.024
			Assay 6 (Setmelanotide)			fold over WT basal											pcDPs	10-5M alpha-MSH	23440	11660	21280							0.289967	0.144241	0.263247							3.76963	1.87516	3.42226
	MC4RWT	10-6M Setmelanotide	1420300	1475660	1733640	21.8172	22.6676	26.6304	92.036	95.6234	112.341						Mittelwert WT1 µM a-MSH											7.69221
	Chim1	10-6M Setmelanotide	60470	101360	60290	0.928879	1.55699	0.926114	3.91848	6.56817	3.90682
	Chim2	10-6M Setmelanotide	309700	274080	330860	4.7573	4.21014	5.08233	20.0687	17.7605	21.4399								Assay 3 (Setmelanotide)									fold over WT basal									fold over WT 1 µM a-MSH [%]
	Chim3	10-6M Setmelanotide	42210	133350	82640	0.648387	2.04839	1.26943	2.73523	8.64114	5.35511						MC4R	10-6M Setmelanotide	635020	459240	1568960	1468210	1099870	323420	683710	244390	407770	5.09143	3.68207	12.5795	11.7717	8.81848	2.5931	5.48181	1.95946	3.2694	82.9418	59.9827	204.926	191.767	143.657	42.2428	89.3014	31.9205	53.26
	pcDPs	10-5M Setmelanotide															H158R	10-6M Setmelanotide	421940	541050	1918450							3.38301	4.338	15.3816							55.1108	70.6681	250.574
	Mittelwert WT1 µM a-MSH					23.7051
																	Chim4	10-6M Setmelanotide	2244370	775010	1884490							17.9948	6.21383	15.1094							293.144	101.226	246.139
			Assay 7 (alphaMSH)			fold over WT basal			fold over WT 1 µM a-MSH [%]								Chim5	10-6M Setmelanotide	647110	1078400	510040							5.18836	8.64634	4.08937							84.5209	140.853	66.6178
	MC4RWT	10-6M alpha-MSH	602880	405700	970010	8.82953	5.94171	14.2064	91.4105	61.5135	147.076						Chim6	10-6M Setmelanotide	1228330	988510	826550							9.84844	7.92562	6.62707							160.436	129.112	107.958
	Chim1	10-6M alpha-MSH	89600	83830	91790	1.31224	1.22774	1.34432	13.5854	12.7106	13.9175						Chim7	10-6M Setmelanotide	2792190	1036690	2504410							22.3871	8.31192	20.0797							364.696	135.405	327.108
	Chim2	10-6M alpha-MSH	366770	580770	713990	5.37156	8.50571	10.4568	55.6108	88.0582	108.257						pcDPs	10-5M Setmelanotide	21490	29090	14420							0.172301	0.233236	0.115616							2.80687	3.79953	1.88344
	Chim3	10-6M alpha-MSH	63170	67510	84400	0.925161	0.988723	1.23609	9.57803	10.2361	12.797
	pcDPs	10-5M alpaMSH															Mittelwert WT1 µM a-MSH											6.13856
	Mittelwert WT1 µM a-MSH					9.6592
																			Assay 4 (alphaMSH)									fold over WT basal									fold over WT 1 µM a-MSH [%]
			Assay 7 (Setmelanotide)			fold over WT basal			fold over WT 1 µM a-MSH [%]								MC4R	10-6M alpha-MSH	1099780	651200	980550	1470500	1430490	1100660	918650	1240470	708960	7.76626	4.59855	6.9243	10.3842	10.1016	7.77247	6.48718	8.75976	5.00643	103.091	61.042	91.9145	137.841	134.091	103.173	86.1121	116.279	66.4563
	MC4RWT	10-6M Setmelanotide	409980	1775360	1515130	4.3711	18.9284	16.1539	33.2374	143.93	122.833						H158R	10-6M alpha-MSH	1115990	1191530	2164340							7.88073	8.41417	15.2838							104.61	111.691	202.88
	Chim1	10-6M Setmelanotide	66510	104490	61620	0.709112	1.11405	0.656976	5.39202	8.47109	4.99558						Chim4	10-6M alpha-MSH	1154830	1036410	1571040							8.155	7.31876	11.0941							108.251	97.1507	147.266
	Chim2	10-6M Setmelanotide	346680	341200	429940	3.69621	3.63779	4.58391	28.1056	27.6614	34.8556						Chim5	10-6M alpha-MSH	2205330	1925230	2878040							15.5733	13.5953	20.3237							206.723	180.467	269.781
	Chim3	10-6M Setmelanotide	78470	109680	95780	0.836627	1.16938	1.02118	6.36162	8.89184	7.76496						Chim6	10-6M alpha-MSH	2054370	1938610	2217480							14.5072	13.6898	15.6591							192.572	181.721	207.861
	pcDPs	10-5M Setmelanotide															Chim7	10-6M alpha-MSH	2919870	3509210	3352310							20.6191	24.7808	23.6728							273.702	328.945	314.238
																	pcDPs	10-5M alpha-MSH	38050	61850	72620							0.268696	0.436763	0.512817							3.56672	5.79768	6.80723
	Mittelwert WT1 µM a-MSH					13.1511
																	Mittelwert WT1 µM a-MSH											7.53341
			Assay 8 (alphaMSH)			fold over WT basal			fold over WT 1 µM a-MSH [%]
	MC4RWT	10-6M alpha-MSH	1499230	1902590	1935740	16.0816	20.4082	20.7638	84.2649	106.936	108.799								Assay 4 (Setmelanotide)									fold over WT basal									fold over WT 1 µM a-MSH [%]
	Chim1	10-6M alpha-MSH	99080	124760	79720	1.06279	1.33824	0.85512	5.56884	7.01219	4.4807						MC4R	10-6M Setmelanotide	1101860	1848080	1206100	1666820	2044560	1954640	2465850	1872600	2178500	6.02157	10.0996	6.59123	9.10902	11.1733	10.6819	13.4757	10.2336	11.9053	60.6936	101.798	66.4355	91.8133	112.62	107.667	135.826	103.148	119.998
	Chim2	10-6M alpha-MSH	455890	637910	388680	4.89012	6.84257	4.16919	25.6235	35.854	21.8459						H158R	10-6M Setmelanotide	2088590	2796100	3664320							11.414	15.2804	20.0252							115.046	154.017	201.841
	Chim3	10-6M alpha-MSH	78110	51780	78470	0.83785	0.55542	0.841712	4.39021	2.91032	4.41044						Chim4	10-6M Setmelanotide	1532720	662970	1141940							8.37618	3.62307	6.2406							84.4267	36.5183	62.9014
																	Chim5	10-6M Setmelanotide	2268060	2255640	2164270							12.3947	12.3269	11.8275							124.931	124.247	119.214
	Mittelwert WT1 µM a-MSH					19.0845											Chim6	10-6M Setmelanotide	2258110	1853240	2035250							12.3404	10.1278	11.1225							124.383	102.082	112.107
																	Chim7	10-6M Setmelanotide	2427880	3091330	3117670							13.2682	16.8938	17.0378							133.735	170.279	171.73
			Assay 8 (Setmelanotide)			fold over WT basal			fold over WT 1 µM a-MSH [%]								pcDPs	10-5M Setmelanotide	71400	47390	35780							0.390195	0.258982	0.195535							3.93292	2.61038	1.97087
	MC4RWT	10-6M Setmelanotide	1212380	1249600	1559490	8.8218	9.09263	11.3475	90.443	93.2196	116.337						Mittelwert WT1 µM a-MSH											9.92125
	Chim1	10-6M Setmelanotide	68880	68400	87660	0.501201	0.497708	0.637852	5.13842	5.10261	6.5394
	Chim2	10-6M Setmelanotide	411910	521870	572540	2.99723	3.79735	4.16605	30.7283	38.9313	42.7112								Assay 5 (alphaMSH)									fold over WT basal									fold over WT 1 µM a-MSH [%]
	Chim3	10-6M Setmelanotide	76900	52540	55910	0.559558	0.382304	0.406825	5.73671	3.91946	4.17086						MC4R	10-6M alpha-MSH	1157570	571360	839050	813140	489130	1412800	1524890	1691720	1227450	12.5093	6.17442	9.06722	8.78722	5.2858	15.2675	16.4788	18.2816	13.2645	107.104	52.865	77.633	75.2357	45.2567	130.719	141.09	156.526	113.57
																	H158R	10-6M alpha-MSH	1580200	1453900	1869050							17.0765	15.7116	20.1979							146.208	134.522	172.934
	Mittelwert WT1 µM a-MSH					9.75398											Chim4	10-6M alpha-MSH	2300390	1816960	1580470							24.8592	19.635	17.0794							212.843	168.114	146.233
																	Chim5	10-6M alpha-MSH	3220590	2149190	3172730							34.8034	23.2253	34.2862							297.985	198.854	293.557
			Assay 9 (alphaMSH)			fold over WT basal			fold over WT 1 µM a-MSH [%]								Chim6	10-6M alpha-MSH	2904590	1768040	3058900							31.3885	19.1064	33.0561							268.747	163.588	283.024
	MC4RWT	10-6M alpha-MSH	187100	142600	147780	1.17555	0.895954	0.9285	117.555	89.5954	92.85						Chim7	10-6M alpha-MSH	1434270	3628000	3582110							15.4995	39.2061	38.7102							132.706	335.68	331.434
	Chim1	10-6M alpha-MSH	49350	73780	62770	0.310065	0.463559	0.394383	31.0065	46.3559	39.4383						pcDPs	10-5M alpha-MSH	23500	13830	24320							0.253953	0.149454	0.262815							2.17434	1.27962	2.25021
	Chim2	10-6M alpha-MSH	151050	185270	146890	0.949045	1.16405	0.922908	94.9045	116.405	92.2908						Mittelwert WT1 µM a-MSH											11.6796
	Chim3	10-6M alpha-MSH	107010	139810	43800	0.672342	0.878424	0.275195	67.2342	87.8424	27.5195
																			Assay 5 (Setmelanotide)									fold over WT basal									fold over WT 1 µM a-MSH [%]
	Mittelwert WT1 µM a-MSH					1
																	MC4R	10-6M Setmelanotide	320720	263700	634290	1596480	2039730	1708760	897590	1516770	1673700	2.51622	2.06887	4.97634	12.5252	16.0028	13.4061	7.04207	11.8999	13.1311	27.0987	22.2809	53.5932	134.892	172.343	144.379	75.8403	128.157	141.416
			Assay 9 (Setmelanotide)			fold over WT basal			fold over WT 1 µM a-MSH [%]								H158R	10-6M Setmelanotide	2650640	2315050	1705200							20.7957	18.1628	13.3782							223.961	195.606	144.078
	MC4RWT	10-6M Setmelanotide	1788350	2595470	2314000	12.7285	18.4731	16.4698	80.1014	116.253	103.646						Chim4	10-6M Setmelanotide	572250	795920	723040							4.4896	6.24441	5.67263							48.3513	67.2499	61.092
	Chim1	10-6M Setmelanotide	63500	41910	45020	0.451957	0.298292	0.320427	2.84421	1.87718	2.01648						Chim5	10-6M Setmelanotide	2298630	1720950	2683310							18.034	13.5018	21.052							194.219	145.409	226.722
	Chim2	10-6M Setmelanotide	457210	615070	597490	3.25416	4.37772	4.2526	20.4788	27.5494	26.762						Chim6	10-6M Setmelanotide	1661090	3213240	1638030							13.0321	25.2096	12.8512							140.351	271.497	138.402
	Chim3	10-6M Setmelanotide	56530	57110	57970	0.402349	0.406477	0.412598	2.53202	2.558	2.59652						Chim7	10-6M Setmelanotide	2157910	1146410	1470330							16.9299	8.99419	11.5355							182.329	96.8639	124.233
	Mittelwert WT1 µM a-MSH					15.8904											pcDPs	10-5M Setmelanotide	13270	15850	11090							0.10411	0.124352	0.0870069							1.12123	1.33922	0.93703
																	Mittelwert WT1 µM a-MSH											9.28539
		Assay 10 (Setmelanotide)							fold over WT basal						fold over WT 1 µM a-MSH [%]
	MC4RWT	10-6M Setmelanotide	2363010	2705180	1614100	3475690	3180780	3137320	9.2684	10.6105	6.33096	13.6327	12.4759	12.3055	86.0524	98.513	58.7798	126.572	115.833	114.25
	Chim4	10-6M Setmelanotide	3892280	3412280	2901350				15.2666	13.3839	11.3799				141.743	124.263	105.657
	Chim7	10-6M Setmelanotide	6706750	6950110	5816470				26.3058	27.2603	22.8139				244.236	253.098	211.815
	pcDPs	10-5M Setmelanotide	144500	82650	91680	72880	85260	3300	0.56677	0.324177	0.359595	0.285856	0.334414	0.0129435	5.26217	3.00982	3.33866	2.65403	3.10486	0.120174
	Mittelwert WT1 µM a-MSH								10.7707
		Assay 11 (Setmelanotide)							fold over WT basal						fold over WT 1 µM a-MSH [%]
	MC4RWT	10-6M Setmelanotide	638280	380620	164570	294680	230870	233490	8.27341	4.93361	2.13316	3.81965	2.99255	3.02651	197.151	117.565	50.8322	91.0204	71.3108	72.1201
	Chim4	10-6M Setmelanotide	403740	410310	456780				5.2333	5.31846	5.9208				124.707	126.736	141.09
	Chim7	10-6M Setmelanotide	880020	915830	1080960				11.4069	11.871	14.0114				271.819	282.88	333.886
	pcDPs	10-5M Setmelanotide	49640	45380	39970	35600	60160	1650	0.643436	0.588218	0.518093	0.461449	0.779796	0.0213874	15.3327	14.0169	12.3459	10.9961	18.5821	0.50965
	Mittelwert WT1 µM a-MSH								4.19648
		Assay 12 (Setmelanotide)							fold over WT basal						fold over WT 1 µM a-MSH [%]
	MC4RWT	10-6M Setmelanotide	513810	347300	363780	405560	432240	285400	5.63141	3.80644	3.98707	4.44498	4.7374	3.12801	131.292	88.7445	92.9556	103.631	110.449	72.9274
	Chim4	10-6M Setmelanotide	672000	623760	701870				7.36519	6.83648	7.69257				171.714	159.387	179.347
	Chim7	10-6M Setmelanotide	704210	975180	1360760				7.71822	10.6881	14.9141				179.945	249.185	347.711
	pcDPs	10-5M Setmelanotide	47240	58110	53550	66400	66120	2770	0.517755	0.636892	0.586914	0.727751	0.724682	0.0303595	12.0711	14.8487	13.6835	16.967	16.8954	0.707809
	Mittelwert WT1 µM a-MSH								4.28922
	Experimente mit PTX
			Assay 13 (alphaMSH)			fold over WT basal			fold over WT 1 µM a-MSH [%]						Assay 13 (Setmelanotide)			fold over WT basal			fold over WT 1 µM Set [%]
	MC4RWT	10-6M alpha-MSH	1711940	1334100	1496320	13.4326	10.4679	11.7408	113.065	88.1106	98.8244		MC4RWT	10-6M alpha-MSH	1992030	2213860	1976190	15.4051	17.1206	15.2826	96.6679	107.433	95.8993
	Chim7	10-6M alpha-MSH	2316580	2318700	2223130	18.1769	18.1935	17.4436	152.998	153.138	146.827		Chim7	10-6M alpha-MSH	1899660	2338300	2717690	14.6907	18.0829	21.0169	92.1855	113.472	131.882
	MC4RWT PTX	10-6M alpha-MSH	998400	1252860	1001880	8.91588	11.1882	8.94695	75.0468	94.1738	75.3084		MC4RWT PTX	10-6M alpha-MSH	1145400	745690	714170	8.24009	5.36455	5.13779	51.7072	33.6629	32.24
	Chim7 PTX	10-6M alpha-MSH	1023460	837460	1248560	9.13967	7.47866	11.1498	76.9305	62.9494	93.8506		Chim7 PTX	10-6M alpha-MSH	925560	804530	1002220	6.65855	5.78785	7.21004	41.7829	36.3192	45.2435
	Mittelwert WT1 µM a-MSH					11.8804							Mittelwert WT 1 µM Set					15.9361
			Assay 14 (alphaMSH)			fold over WT basal			fold over WT 1 µM a-MSH [%]						Assay 14 (Setmelanotide)			fold over WT basal			fold over WT 1 µM Set [%]
	MC4RWT	10-6M alpha-MSH	138520	197360	68200	6.01912	8.5759	2.9635	102.841	146.525	50.6335		MC4RWT	10-6M alpha-MSH	151140	97430	126290	7.63205	4.91988	6.37721	120.957	77.9731	101.07
	Chim7	10-6M alpha-MSH	238780	250020	355680	10.3757	10.8641	15.4554	177.277	185.622	264.067		Chim7	10-6M alpha-MSH	296260	401370	357130	14.9601	20.2678	18.0338	237.097	321.216	285.811
	MC4RWT PTX	10-6M alpha-MSH	309520	149630	85210	11.7718	5.6908	3.24075	201.13	97.2314	55.3705		MC4RWT PTX	10-6M alpha-MSH	77810	73020	51120	0.428815	0.402418	0.281725	6.79612	6.37775	4.46495
	Chim7 PTX	10-6M alpha-MSH	222250	250790	186450	8.45271	9.53816	7.09115	144.421	162.966	121.157		Chim7 PTX	10-6M alpha-MSH	105080	112880	173840	0.579102	0.622088	0.958042	9.17795	9.85922	15.1836
	Mittelwert WT 1 µM a-MSH					5.85284							Mittelwert WT 1 µM Set					6.30971
			Assay 15 (alphaMSH)			fold over WT basal			fold over WT 1 µM a-MSH [%]						Assay 15 (Setmelanotide)			fold over WT basal			fold over WT 1 µM Set [%]
	MC4RWT	10-6M alpha-MSH	407190	146470	271910	4.44611	1.59931	2.96899	147.967	53.225	98.8081		MC4RWT	10-6M alpha-MSH	819390	649510	533820	8.18571	6.48861	5.33287	122.742	97.2942	79.9642
	Chim7	10-6M alpha-MSH	1219790	1079410	1131270	13.3189	11.7861	12.3524	443.254	392.242	411.087		Chim7	10-6M alpha-MSH	933790	1004180	1052390	9.32857	10.0318	10.5134	139.878	150.422	157.644
	MC4RWT PTX	10-6M alpha-MSH	347170	197190	255990	1.99937	1.13563	1.47426	66.539	37.7937	49.0633		MC4RWT PTX	10-6M alpha-MSH	623100	424730	423280	3.74684	2.554	2.54528	56.1824	38.2962	38.1655
	Chim7 PTX	10-6M alpha-MSH	639740	522610	559940	3.68429	3.00973	3.22472	122.613	100.164	107.319		Chim7 PTX	10-6M alpha-MSH	318430	405560	353130	1.91479	2.43873	2.12345	28.7116	36.5677	31.8403
	Mittelwert WT 1 µM a-MSH					3.0048							Mittelwert WT 1 µM Set					6.66906
			Assay 16 (alphaMSH)			fold over WT basal			fold over WT 1 µM a-MSH [%]						Assay 16 (Setmelanotide)			fold over WT basal			fold over WT 1 µM Set [%]
	MC4RWT	10-6M alpha-MSH	352780	278000	288580	7.28383	5.73985	5.95829	115.117	90.7153	94.1677		MC4RWT	10-6M alpha-MSH	523760	667390	974360	1.7091	2.17779	3.17947	72.5594	92.4572	134.983
	Chim7	10-6M alpha-MSH	1367060	1207070	1321690	28.2256	24.9223	27.2889	446.091	393.884	431.286		Chim7	10-6M alpha-MSH	763410	906840	1029410	2.49111	2.95915	3.35911	105.759	125.63	142.61
	MC4RWT PTX	10-6M alpha-MSH	188310	152260	232600	2.98731	2.41542	3.68992	47.2128	38.1744	58.3172		MC4RWT PTX	10-6M alpha-MSH	326730	373760	343310	3.14779	3.60089	3.30752	133.638	152.874	140.42
	Chim7 PTX	10-6M alpha-MSH	538660	742420	584080	8.54519	11.7776	9.26572	135.052	186.139	146.44		Chim7 PTX	10-6M alpha-MSH	409530	280480	359320	3.9455	2.70221	3.46177	167.505	114.721	146.968
	Mittelwert WT 1 µM a-MSH					6.32732							Mittelwert WT 1 µM Set					2.35545
			Assay 17 (alphaMSH)			fold over WT basal			fold over WT 1 µM a-MSH [%]						Assay 17 (Setmelanotide)			fold over WT basal			fold over WT 1 µM Set [%]
	MC4RWT	10-6M alpha-MSH	1689150	4458620	1913070	2.46798	6.51439	2.79514	62.865	165.936	71.1987		MC4RWT	10-6M alpha-MSH	2143010	836700	2129810	3.83585	1.49764	3.81222	125.825	49.1259	125.05
	Chim7	10-6M alpha-MSH	2968950	2838890	3812450	4.33786	4.14784	5.57028	110.495	105.655	141.888		Chim7	10-6M alpha-MSH	1688530	4351070	2243510	3.02236	7.78813	4.01573	99.1402	255.468	131.725
	MC4RWT PTX	10-6M alpha-MSH	851450	725090	676590	2.42224	2.06277	1.92479	61.7	52.5434	49.0288		MC4RWT PTX	10-6M alpha-MSH	473900	867000	361500	1.45615	2.66403	1.11078	47.7652	87.3863	36.4362
	Chim7 PTX	10-6M alpha-MSH	716880	559240	369270	2.03941	1.59095	1.05051	51.9484	40.5251	26.759		Chim7 PTX	10-6M alpha-MSH	609730	841000	1225410	1.87352	2.58414	3.76532	61.4557	84.7658	123.511
																					0	0	0
	Mittelwert WT 1 µM a-MSH					3.92584							Mittelwert WT 1 µM Set					3.04857
			Assay 18 (alphaMSH)			fold over WT basal			fold over WT 1 µM a-MSH [%]						Assay 18 (Setmelanotide)			fold over WT basal			fold over WT 1 µM Set [%]
	MC4RWT	10-6M alpha-MSH	2507700	2021090	1598420	4.75114	3.8292	3.0284	122.782	98.9565	78.2617		MC4RWT	10-6M alpha-MSH	1772590	1765300	1632100	2.66551	2.65455	2.45425	102.858	102.435	94.7062
	Chim7	10-6M alpha-MSH	3233370	5303630	4891490	6.12601	10.0484	9.26752	158.312	259.676	239.497		Chim7	10-6M alpha-MSH	3339390	3558310	2982900	5.02156	5.35076	4.4855	193.775	206.479	173.089
	MC4RWT PTX	10-6M alpha-MSH	1230320	1568890	819090	5.29299	6.74956	3.52383	136.785	174.426	91.0648		MC4RWT PTX	10-6M alpha-MSH	691400	820180	1004470	1.57296	1.86594	2.28521	60.6984	72.0041	88.1831
	Chim7 PTX	10-6M alpha-MSH	1447660	1137850	1206830	6.22801	4.89517	5.19193	160.948	126.504	134.173		Chim7 PTX	10-6M alpha-MSH	905240	769720	1243700	2.05945	1.75114	2.82946	79.4716	67.5742	109.185
	Mittelwert WT 1 µM a-MSH					3.86958							Mittelwert WT 1 µM Set					2.59143
			Assay 19 (alphaMSH)			fold over WT basal			fold over WT 1 µM a-MSH [%]						Assay 19 (Setmelanotide)			fold over WT basal			fold over WT 1 µM Set [%]
	MC4RWT	10-6M alpha-MSH	3516210	2490790	4766490	11.5462	8.17904	15.6518	97.9128	69.3589	132.728		MC4RWT	10-6M alpha-MSH	3920350	4327770	3634330	13.5264	14.9321	12.5395	98.9783	109.265	91.7571
	Chim7	10-6M alpha-MSH	2033570	1147740	3313980	6.67766	3.76885	10.8822	56.6271	31.9601	92.2815		Chim7	10-6M alpha-MSH	2594990	3485360	3575240	8.95349	12.0255	12.3356	65.5165	87.996	90.2652
	MC4RWT PTX	10-6M alpha-MSH	2327760	3451130	2421590	16.4011	24.3163	17.0623	139.083	206.204	144.689		MC4RWT PTX	10-6M alpha-MSH	2615910	1751780	4510900	7.85496	5.26018	13.5452	57.4781	38.491	99.1158
	Chim7 PTX	10-6M alpha-MSH	941420	962470	1311440	6.63314	6.78146	9.24026	56.2496	57.5073	78.3581		Chim7 PTX	10-6M alpha-MSH	1537640	1194760	1281000	4.61717	3.58758	3.84654	33.7858	26.2519	28.1468
	Mittelwert WT 1 µM a-MSH					11.7923							Mittelwert WT 1 µM Set					13.666
			Assay 20 (alphaMSH)			fold over WT basal			fold over WT 1 µM a-MSH [%]						Assay 20 (Setmelanotide)			fold over WT basal			fold over WT 1 µM Set [%]
	MC4RWT	10-6M alpha-MSH	3541420	3495250	3161920	21.9973	21.7105	19.6401	104.174	102.816	93.0105		MC4RWT	10-6M alpha-MSH	5847670	4898160	4065810	19.9932	16.7468	13.901	118.441	99.209	82.3503
	Chim7	10-6M alpha-MSH	1323020	2520680	718510	8.21786	15.657	4.46298	38.9177	74.1479	21.1356		Chim7	10-6M alpha-MSH	1025420	3183810	5638590	3.50591	10.8854	19.2783	20.7692	64.486	114.206
	MC4RWT PTX	10-6M alpha-MSH	2063640	1733080	907880	4.30164	3.61259	1.89247	20.3715	17.1083	8.96226		MC4RWT PTX	10-6M alpha-MSH	1234730	1120930	1842460	3.67468	3.336	5.48335	21.769	19.7627	32.4837
	Chim7 PTX	10-6M alpha-MSH	844610	582730	1158380	1.76058	1.2147	2.41463	8.33768	5.7525	11.4351		Chim7 PTX	10-6M alpha-MSH	919650	1667520	971240	2.73697	4.96271	2.89051	16.214	29.3994	17.1235
	Mittelwert WT 1 µM a-MSH					21.116							Mittelwert WT 1 µM Set					16.8803
[truncated: 5 more columns]

[truncated: 1 more sheets: calculation]
